# Supplementary material for: Human Cerebral Organoids and Fetal Brain Tissue Share Proteomic Similarities
Source: PubMed Central journal article supplement (PMC6893972; doi:10.3389/fcell.2019.00303), 2019-11-28
Supplement: Data_Sheet_1.pdf [file Data_Sheet_1.pdf]

Human cerebral organoids and fetal brain tissue share proteomic similarities: enabling alternative models to study psychiatric disorders

**Juliana Minardi Nascimento<sup>1,2</sup>, Verônica M Saia-Cereda<sup>1</sup>, Rafaela C. Sartore<sup>2,3</sup>, Rodrigo Madeiro da Costa<sup>2</sup>, Clarissa S. Schitine<sup>4,5</sup>, Hercules Rezende Freitas<sup>5,6</sup>, Michael Murgu<sup>7</sup>, Ricardo A. de Melo Reis<sup>5</sup>, Stevens K Rehen<sup>2,4\*</sup>, Daniel Martins-de-Souza<sup>1,8,9\*</sup>**

### **Supplementary information**

**Supplementary Table 1:** Protein expression of PSC-derived, 45-day cerebral organoids.

(Excel file)

**Supplementary Table 2:** Enriched proteins of glutamatergic and dopaminergic synapse

(Excel file)

**Supplementary Figure 1, 2 and 3**

|        | Organoid correlation | Overlap % |
|--------|----------------------|-----------|
| VZ     | 16w                  | 0.35      |
|        | 18w                  | 0.32      |
|        | 20w                  | 0.36      |
| IZ     | 16w                  | 0.32      |
|        | 18w                  | 0.30      |
|        | 20w                  | 0.29      |
| SP     | 16w                  | 0.31      |
|        | 18w                  | 0.29      |
|        | 20w                  | 0.30      |
| Cortex | 16w                  | 0.28      |
|        | 18w                  | 0.31      |
|        | 20w                  | 0.34      |

**B** Common proteins to 45-day organoids

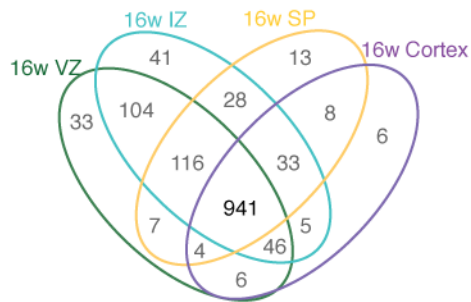

**C** Common proteins of 16 week VZ, IZ, SP and cortex to organoids

|                             | GO Terms                                        | FDR       |
|-----------------------------|-------------------------------------------------|-----------|
| <b>Biological Processes</b> | Cell-cell adhesion                              | 1.22E-40  |
|                             | mRNA splicing                                   | 5.84E-28  |
|                             | Regulation of mRNA stability                    | 9.71E-28  |
|                             | Translational initiation                        | 2.62E-23  |
| <b>Cellular Compartment</b> | Extracellular exosome                           | 1.48E-162 |
|                             | Cytosol                                         | 3.26E-110 |
|                             | Myelin sheath                                   | 7.03E-68  |
|                             | Membrane                                        | 1.59E-60  |
| <b>Molecular Function</b>   | Poly(A) RNA binding                             | 1.69E-109 |
|                             | Protein binding                                 | 1.70E-58  |
|                             | Cadherin binding involved in cell-cell adhesion | 1.17E-45  |
|                             | RNA binding                                     | 1.02E-36  |

**SUPPLEMENTARY FIGURE 1:** Comparison of cerebral organoid proteomes with developing brain sub-compartments (ventricular zone, VZ; intermediate zone, IZ; subplate, SP; cortex). **(A)** Spearman correlation of 45-day cerebral organoid proteomes to 16-20 weeks (VZ, IZ, SP, and cortex proteomes). **(B)** Venn diagram of proteins commonly found in 45-day cerebral organoids and 16-week developing human brain areas. **(C)** Gene ontology of the proteins found in common to the 16-week (VZ, IZ, SP, and cortex) proteomes and cerebral organoids proteomes.

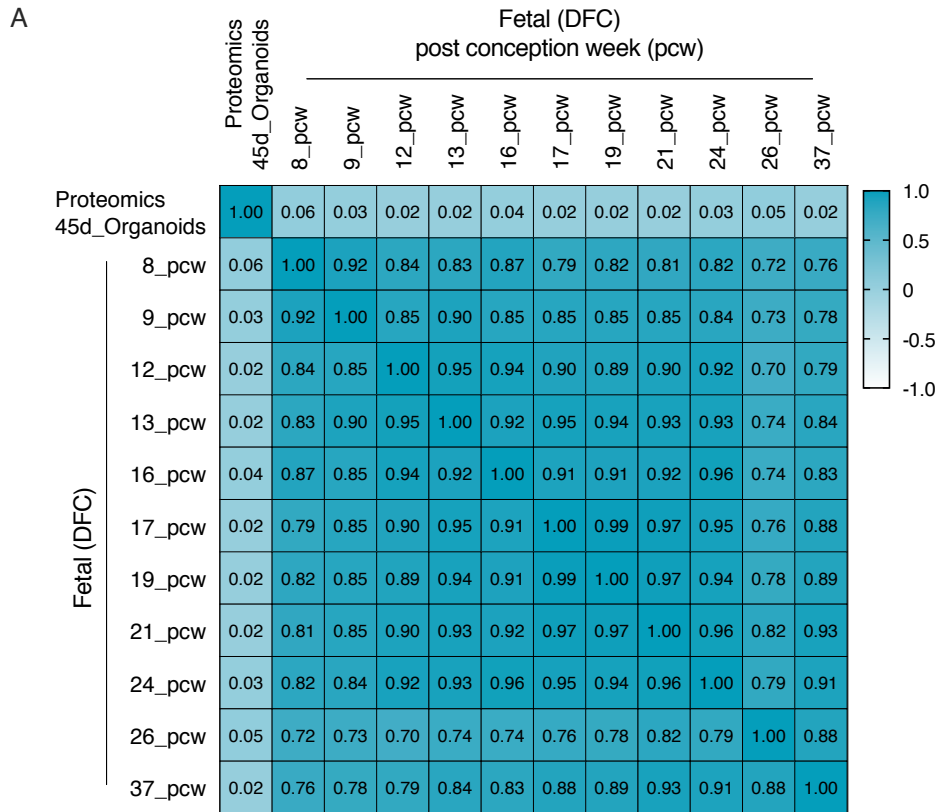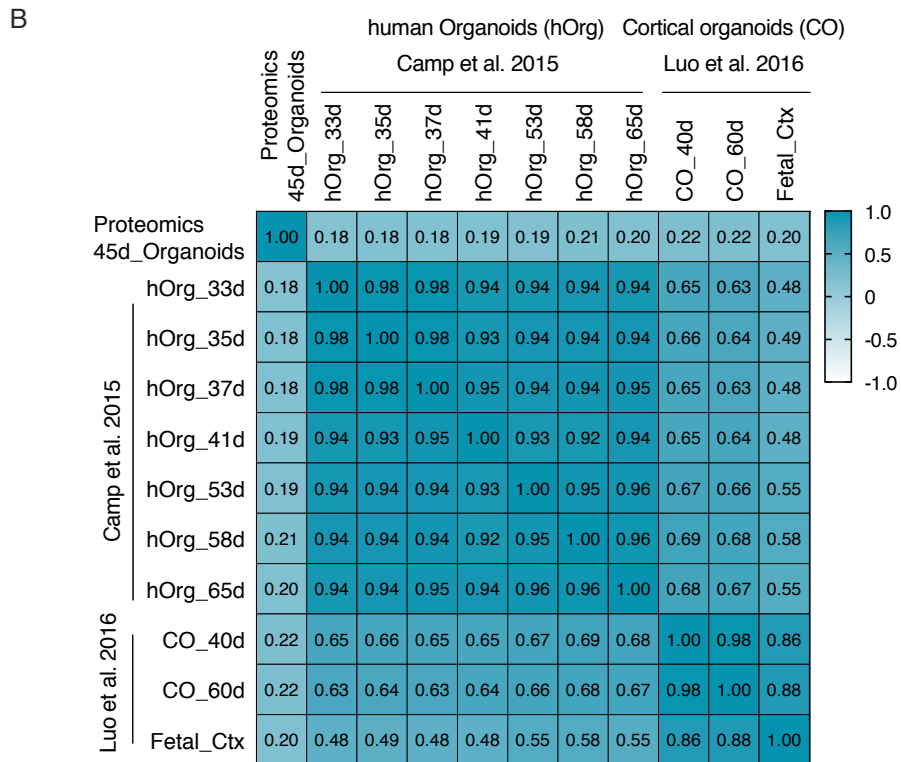

**SUPPLEMENTARY FIGURE 2:** Comparison of cerebral organoid proteomes with transcriptomics of the developing brain and cortical cerebral organoids. Spearman correlation of 45-day cerebral organoid proteome compared to **(A)** human fetal 8-37 post conceptional week, dorsolateral prefrontal cortex (DFC) and **(B)** human cortical organoids of 33 to 65 days *in vitro*.

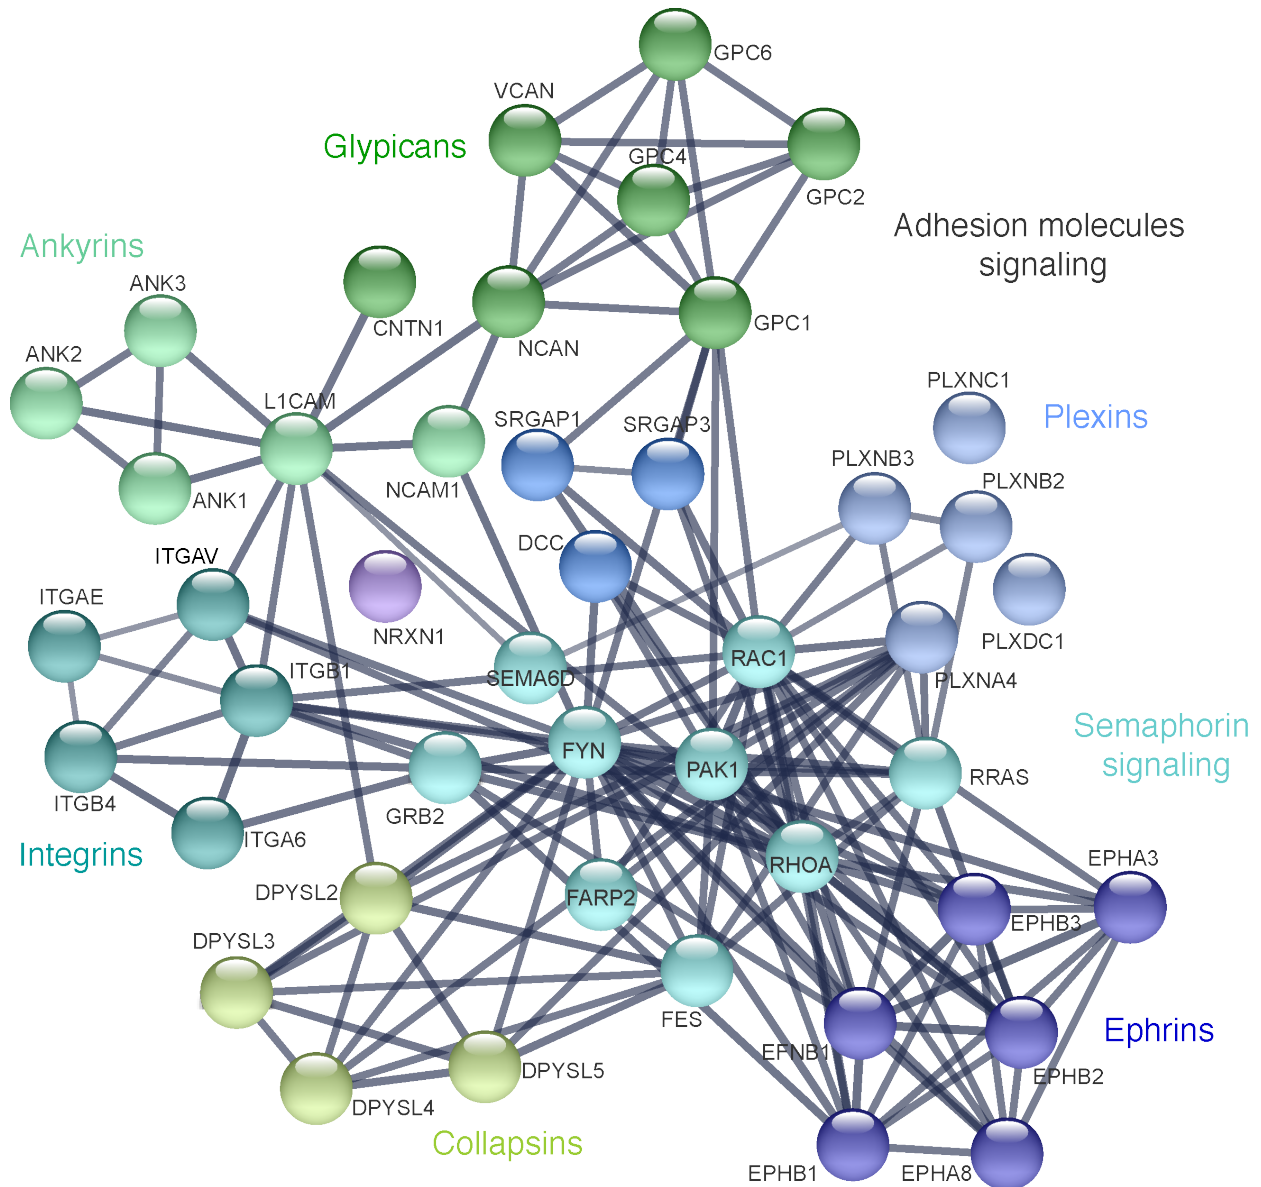

**SUPPLEMENTARY FIGURE 3:** Interactive organizational network of proteins from 45-day cerebral organoids. Molecular relationships between proteins found in cerebral organoids from the dataset are based on the STRING database (<https://string-db.org/>). Groups of proteins are separated by different colors, as indicated.
