# Supplementary material for: Human Cerebral Organoids and Fetal Brain Tissue Share Proteomic Similarities
Source: Front Cell Dev Biol. 2019 Nov 28;7:303. doi: 10.3389/fcell.2019.00303 (PMC6893972; doi:10.3389/fcell.2019.00303)
Supplement: Supplementary file 2 [file Table_1.xlsx]

## Sheet: Proteomics
Accession	Peptide count	Unique peptides	GeneName	Description	45-day organoids (Intensity)	Intensity (Log)
Q8N1G4	75	33	LRRC47	Leucine-rich repeat-containing protein 47 OS=Homo sapiens GN=LRRC47 PE=1 SV=1	51284.3	15.6462
Q70CQ2	109	29	USP34	Ubiquitin carboxyl-terminal hydrolase 34 OS=Homo sapiens GN=USP34 PE=1 SV=2	43004.6	15.3922
A0A0C4DGK3	199	38	SYNE2	Nesprin-2 OS=Homo sapiens GN=SYNE2 PE=1 SV=1	37327.6	15.188
Q13972	9	2	RASGRF1	Ras-specific guanine nucleotide-releasing factor 1 OS=Homo sapiens GN=RASGRF1 PE=1 SV=2	37154.2	15.1812
P07437	283	146	TUBB	Tubulin beta chain OS=Homo sapiens GN=TUBB PE=1 SV=2	36253.6	15.1458
P28482	56	16	MAPK1	Mitogen-activated protein kinase 1 OS=Homo sapiens GN=MAPK1 PE=1 SV=3	32478.6	14.9872
P42345	80	11	MTOR	Serine/threonine-protein kinase mTOR OS=Homo sapiens GN=MTOR PE=1 SV=1	25944.8	14.6632
P68104	163	63	EEF1A1	Elongation factor 1-alpha 1 OS=Homo sapiens GN=EEF1A1 PE=1 SV=1	25896.4	14.6605
H0Y390	451	104	MACF1	Microtubule-actin cross-linking factor 1_ isoforms 1/2/3/5 (Fragment) OS=Homo sapiens GN=MACF1 PE=1 SV=1	24989.9	14.6091
P11137	314	126	MAP2	Microtubule-associated protein 2 OS=Homo sapiens GN=MAP2 PE=1 SV=4	23966	14.5487
Q5T5P2	129	25	KIAA1217	Sickle tail protein homolog OS=Homo sapiens GN=KIAA1217 PE=1 SV=2	23799	14.5386
Q9BV73	357	89	CEP250	Centrosome-associated protein CEP250 OS=Homo sapiens GN=CEP250 PE=1 SV=2	21871.3	14.4168
P35580	459	190	MYH10	Myosin-10 OS=Homo sapiens GN=MYH10 PE=1 SV=3	21774	14.4103
Q16322	6	2	KCNA10	Potassium voltage-gated channel subfamily A member 10 OS=Homo sapiens GN=KCNA10 PE=1 SV=2	19388.8	14.2429
Q8IZT6	253	39	ASPM	Abnormal spindle-like microcephaly-associated protein OS=Homo sapiens GN=ASPM PE=1 SV=2	17732.8	14.1141
Q9UHV9	16	6	PFDN2	Prefoldin subunit 2 OS=Homo sapiens GN=PFDN2 PE=1 SV=1	17192.4	14.0695
P06733	227	95	ENO1	Alpha-enolase OS=Homo sapiens GN=ENO1 PE=1 SV=2	16268	13.9897
P38646	180	70	HSPA9	Stress-70 protein_ mitochondrial OS=Homo sapiens GN=HSPA9 PE=1 SV=2	16207.6	13.9844
P68363	261	136	TUBA1B	Tubulin alpha-1B chain OS=Homo sapiens GN=TUBA1B PE=1 SV=1	16001.1	13.9659
P15924	353	105	DSP	Desmoplakin OS=Homo sapiens GN=DSP PE=1 SV=3	15196.5	13.8915
Q9Y3I0	80	30	RTCB	tRNA-splicing ligase RtcB homolog OS=Homo sapiens GN=RTCB PE=1 SV=1	15083.2	13.8807
Q8NDI1	98	16	EHBP1	EH domain-binding protein 1 OS=Homo sapiens GN=EHBP1 PE=1 SV=3	14454.6	13.8192
P10809	294	127	HSPD1	60 kDa heat shock protein_ mitochondrial OS=Homo sapiens GN=HSPD1 PE=1 SV=2	13937.5	13.7667
Q9H6S0	64	10	YTHDC2	Probable ATP-dependent RNA helicase YTHDC2 OS=Homo sapiens GN=YTHDC2 PE=1 SV=2	13272.2	13.6961
P06748	104	51	NPM1	Nucleophosmin OS=Homo sapiens GN=NPM1 PE=1 SV=2	13023.3	13.6688
Q9NZI8	95	43	IGF2BP1	Insulin-like growth factor 2 mRNA-binding protein 1 OS=Homo sapiens GN=IGF2BP1 PE=1 SV=2	12096.1	13.5623
Q15084	86	47	PDIA6	Protein disulfide-isomerase A6 OS=Homo sapiens GN=PDIA6 PE=1 SV=1	11641.6	13.507
P55809	41	10	OXCT1	Succinyl-CoA:3-ketoacid coenzyme A transferase 1_ mitochondrial OS=Homo sapiens GN=OXCT1 PE=1 SV=1	11415	13.4786
P13645	119	54	KRT10	Keratin_ type I cytoskeletal 10 OS=Homo sapiens GN=KRT10 PE=1 SV=6	11162.3	13.4463
P62736	218	62	ACTA2	Actin_ aortic smooth muscle OS=Homo sapiens GN=ACTA2 PE=1 SV=1	11161.5	13.4462
Q8IYU2	3	2	HACE1	E3 ubiquitin-protein ligase HACE1 OS=Homo sapiens GN=HACE1 PE=1 SV=2	11083.2	13.4361
Q9Y262	73	9	EIF3L	Eukaryotic translation initiation factor 3 subunit L OS=Homo sapiens GN=EIF3L PE=1 SV=1	10530.4	13.3623
P21817	330	81	RYR1	Ryanodine receptor 1 OS=Homo sapiens GN=RYR1 PE=1 SV=3	10495.5	13.3575
P04406	151	69	GAPDH	Glyceraldehyde-3-phosphate dehydrogenase OS=Homo sapiens GN=GAPDH PE=1 SV=3	10413.9	13.3462
P62258	169	55	YWHAE	14-3-3 protein epsilon OS=Homo sapiens GN=YWHAE PE=1 SV=1	10337.6	13.3356
P49721	19	6	PSMB2	Proteasome subunit beta type-2 OS=Homo sapiens GN=PSMB2 PE=1 SV=1	10325	13.3339
P78527	325	107	PRKDC	DNA-dependent protein kinase catalytic subunit OS=Homo sapiens GN=PRKDC PE=1 SV=3	10287.1	13.3285
P11055	102	10	MYH3	Myosin-3 OS=Homo sapiens GN=MYH3 PE=1 SV=3	10187.5	13.3145
P05091	69	19	ALDH2	Aldehyde dehydrogenase_ mitochondrial OS=Homo sapiens GN=ALDH2 PE=1 SV=2	10170.5	13.3121
P31150	121	52	GDI1	Rab GDP dissociation inhibitor alpha OS=Homo sapiens GN=GDI1 PE=1 SV=2	9929.49	13.2775
Q9BPU6	146	49	DPYSL5	Dihydropyrimidinase-related protein 5 OS=Homo sapiens GN=DPYSL5 PE=1 SV=1	9900.42	13.2733
P35527	138	51	KRT9	Keratin_ type I cytoskeletal 9 OS=Homo sapiens GN=KRT9 PE=1 SV=3	9465.32	13.2084
P11021	254	133	HSPA5	78 kDa glucose-regulated protein OS=Homo sapiens GN=HSPA5 PE=1 SV=2	9086.9	13.1496
Q99943	3	2	AGPAT1	1-acyl-sn-glycerol-3-phosphate acyltransferase alpha OS=Homo sapiens GN=AGPAT1 PE=1 SV=2	8881.92	13.1167
Q9NWH9	71	9	SLTM	SAFB-like transcription modulator OS=Homo sapiens GN=SLTM PE=1 SV=2	8764.26	13.0974
P25705	189	69	ATP5A1	ATP synthase subunit alpha_ mitochondrial OS=Homo sapiens GN=ATP5A1 PE=1 SV=1	8758.06	13.0964
P04264	233	121	KRT1	Keratin_ type II cytoskeletal 1 OS=Homo sapiens GN=KRT1 PE=1 SV=6	8694.3	13.0859
P63244	65	19	RACK1	Receptor of activated protein C kinase 1 OS=Homo sapiens GN=RACK1 PE=1 SV=3	8635.76	13.0761
Q14643	122	21	ITPR1	Inositol 1_4_5-trisphosphate receptor type 1 OS=Homo sapiens GN=ITPR1 PE=1 SV=3	8556	13.0627
P07900	230	72	HSP90AA1	Heat shock protein HSP 90-alpha OS=Homo sapiens GN=HSP90AA1 PE=1 SV=5	8516.96	13.0561
Q6UWU2	16	4	GLB1L	Beta-galactosidase-1-like protein OS=Homo sapiens GN=GLB1L PE=2 SV=1	8435.48	13.0423
Q2LD37	281	70	KIAA1109	Uncharacterized protein KIAA1109 OS=Homo sapiens GN=KIAA1109 PE=1 SV=2	8319.82	13.0223
P09960	96	35	LTA4H	Leukotriene A-4 hydrolase OS=Homo sapiens GN=LTA4H PE=1 SV=2	8277.83	13.015
O43776	92	20	NARS	Asparagine--tRNA ligase_ cytoplasmic OS=Homo sapiens GN=NARS PE=1 SV=1	7974.52	12.9612
Q01518	94	34	CAP1	Adenylyl cyclase-associated protein 1 OS=Homo sapiens GN=CAP1 PE=1 SV=5	7953.85	12.9574
Q9NSI6	73	14	BRWD1	Bromodomain and WD repeat-containing protein 1 OS=Homo sapiens GN=BRWD1 PE=1 SV=4	7931.32	12.9533
O60812	69	15	HNRNPCL1	Heterogeneous nuclear ribonucleoprotein C-like 1 OS=Homo sapiens GN=HNRNPCL1 PE=1 SV=1	7824.46	12.9338
Q14195	140	58	DPYSL3	Dihydropyrimidinase-related protein 3 OS=Homo sapiens GN=DPYSL3 PE=1 SV=1	7775.41	12.9247
P00558	123	58	PGK1	Phosphoglycerate kinase 1 OS=Homo sapiens GN=PGK1 PE=1 SV=3	7769.26	12.9236
P11586	118	11	MTHFD1	C-1-tetrahydrofolate synthase_ cytoplasmic OS=Homo sapiens GN=MTHFD1 PE=1 SV=3	7630.42	12.8975
A7E2Y1	186	11	MYH7B	Myosin-7B OS=Homo sapiens GN=MYH7B PE=1 SV=3	7570.77	12.8862
P23378	39	6	GLDC	Glycine dehydrogenase (decarboxylating)_ mitochondrial OS=Homo sapiens GN=GLDC PE=1 SV=2	7518.11	12.8762
Q16555	200	67	DPYSL2	Dihydropyrimidinase-related protein 2 OS=Homo sapiens GN=DPYSL2 PE=1 SV=1	7366.78	12.8468
Q9UBT6	35	5	POLK	DNA polymerase kappa OS=Homo sapiens GN=POLK PE=1 SV=1	7172.2	12.8082
P27986	16	2	PIK3R1	Phosphatidylinositol 3-kinase regulatory subunit alpha OS=Homo sapiens GN=PIK3R1 PE=1 SV=2	7161.77	12.8061
P08238	349	140	HSP90AB1	Heat shock protein HSP 90-beta OS=Homo sapiens GN=HSP90AB1 PE=1 SV=4	7146.77	12.8031
P31942	66	33	HNRNPH3	Heterogeneous nuclear ribonucleoprotein H3 OS=Homo sapiens GN=HNRNPH3 PE=1 SV=2	7134.66	12.8006
Q13402	74	9	MYO7A	Unconventional myosin-VIIa OS=Homo sapiens GN=MYO7A PE=1 SV=2	7091.04	12.7918
P48634	60	14	PRRC2A	Protein PRRC2A OS=Homo sapiens GN=PRRC2A PE=1 SV=3	6967.65	12.7665
P06576	194	91	ATP5B	ATP synthase subunit beta_ mitochondrial OS=Homo sapiens GN=ATP5B PE=1 SV=3	6921.94	12.757
Q14240	120	35	EIF4A2	Eukaryotic initiation factor 4A-II OS=Homo sapiens GN=EIF4A2 PE=1 SV=2	6880.56	12.7483
A5YKK6	167	44	CNOT1	CCR4-NOT transcription complex subunit 1 OS=Homo sapiens GN=CNOT1 PE=1 SV=2	6857.79	12.7435
P52701	140	15	MSH6	DNA mismatch repair protein Msh6 OS=Homo sapiens GN=MSH6 PE=1 SV=2	6808.98	12.7332
Q9BXP5	78	14	SRRT	Serrate RNA effector molecule homolog OS=Homo sapiens GN=SRRT PE=1 SV=1	6537.6	12.6745
Q01082	513	69	SPTBN1	Spectrin beta chain_ non-erythrocytic 1 OS=Homo sapiens GN=SPTBN1 PE=1 SV=2	6531.64	12.6732
Q7Z5J4	10	2	RAI1	Retinoic acid-induced protein 1 OS=Homo sapiens GN=RAI1 PE=1 SV=2	6504.41	12.6672
O75874	124	56	IDH1	Isocitrate dehydrogenase [NADP] cytoplasmic OS=Homo sapiens GN=IDH1 PE=1 SV=2	6488.46	12.6637
P41250	97	33	GARS	Glycine--tRNA ligase OS=Homo sapiens GN=GARS PE=1 SV=3	6428.92	12.6504
Q8IVF4	507	21	DNAH10	Dynein heavy chain 10_ axonemal OS=Homo sapiens GN=DNAH10 PE=1 SV=4	6403.64	12.6447
P00441	15	7	SOD1	Superoxide dismutase [Cu-Zn] OS=Homo sapiens GN=SOD1 PE=1 SV=2	6365.58	12.6361
Q8TD57	279	52	DNAH3	Dynein heavy chain 3_ axonemal OS=Homo sapiens GN=DNAH3 PE=2 SV=1	6271.08	12.6145
P55072	208	110	VCP	Transitional endoplasmic reticulum ATPase OS=Homo sapiens GN=VCP PE=1 SV=4	6252.31	12.6102
P61978	149	50	HNRNPK	Heterogeneous nuclear ribonucleoprotein K OS=Homo sapiens GN=HNRNPK PE=1 SV=1	6236.41	12.6065
P48735	89	27	IDH2	Isocitrate dehydrogenase [NADP]_ mitochondrial OS=Homo sapiens GN=IDH2 PE=1 SV=2	6234.02	12.6059
Q9UQ35	229	51	SRRM2	Serine/arginine repetitive matrix protein 2 OS=Homo sapiens GN=SRRM2 PE=1 SV=2	6209.02	12.6001
Q13200	124	46	PSMD2	26S proteasome non-ATPase regulatory subunit 2 OS=Homo sapiens GN=PSMD2 PE=1 SV=3	6155.17	12.5876
Q14789	448	96	GOLGB1	Golgin subfamily B member 1 OS=Homo sapiens GN=GOLGB1 PE=1 SV=2	6154.49	12.5874
P55209	46	11	NAP1L1	Nucleosome assembly protein 1-like 1 OS=Homo sapiens GN=NAP1L1 PE=1 SV=1	6096.92	12.5739
Q9P2M7	174	33	CGN	Cingulin OS=Homo sapiens GN=CGN PE=1 SV=2	6085.62	12.5712
Q96T58	212	41	SPEN	Msx2-interacting protein OS=Homo sapiens GN=SPEN PE=1 SV=1	6060.92	12.5653
P50990	170	59	CCT8	T-complex protein 1 subunit theta OS=Homo sapiens GN=CCT8 PE=1 SV=4	6025.51	12.5569
Q5VW36	15	3	FOCAD	Focadhesin OS=Homo sapiens GN=FOCAD PE=1 SV=1	6025.35	12.5568
P13010	169	74	XRCC5	X-ray repair cross-complementing protein 5 OS=Homo sapiens GN=XRCC5 PE=1 SV=3	5924.74	12.5325
Q9HAV4	31	11	XPO5	Exportin-5 OS=Homo sapiens GN=XPO5 PE=1 SV=1	5841.47	12.5121
Q8IWJ2	271	45	GCC2	GRIP and coiled-coil domain-containing protein 2 OS=Homo sapiens GN=GCC2 PE=1 SV=4	5754.86	12.4906
P07954	58	29	FH	Fumarate hydratase_ mitochondrial OS=Homo sapiens GN=FH PE=1 SV=3	5749.03	12.4891
Q16650	35	8	TBR1	T-box brain protein 1 OS=Homo sapiens GN=TBR1 PE=1 SV=1	5748.93	12.4891
O60749	70	25	SNX2	Sorting nexin-2 OS=Homo sapiens GN=SNX2 PE=1 SV=2	5641.19	12.4618
Q68DD2	4	2	PLA2G4F	Cytosolic phospholipase A2 zeta OS=Homo sapiens GN=PLA2G4F PE=2 SV=3	5548.04	12.4378
O95831	61	14	AIFM1	Apoptosis-inducing factor 1_ mitochondrial OS=Homo sapiens GN=AIFM1 PE=1 SV=1	5464.82	12.416
P80723	69	24	BASP1	Brain acid soluble protein 1 OS=Homo sapiens GN=BASP1 PE=1 SV=2	5435.95	12.4083
P11940	94	8	PABPC1	Polyadenylate-binding protein 1 OS=Homo sapiens GN=PABPC1 PE=1 SV=2	5431.87	12.4072
Q99832	101	40	CCT7	T-complex protein 1 subunit eta OS=Homo sapiens GN=CCT7 PE=1 SV=2	5412.69	12.4021
P50991	115	49	CCT4	T-complex protein 1 subunit delta OS=Homo sapiens GN=CCT4 PE=1 SV=4	5411.69	12.4019
Q15149	743	244	PLEC	Plectin OS=Homo sapiens GN=PLEC PE=1 SV=3	5391.47	12.3965
P40925	95	21	MDH1	Malate dehydrogenase_ cytoplasmic OS=Homo sapiens GN=MDH1 PE=1 SV=4	5377.69	12.3928
Q5VT06	336	81	CEP350	Centrosome-associated protein 350 OS=Homo sapiens GN=CEP350 PE=1 SV=1	5341.16	12.3829
P14618	200	57	PKM	Pyruvate kinase PKM OS=Homo sapiens GN=PKM PE=1 SV=4	5314.57	12.3757
A0A1C7CYX9	92	15	DPYSL2	Dihydropyrimidinase-related protein 2 OS=Homo sapiens GN=DPYSL2 PE=1 SV=1	5286.41	12.3681
P69905	17	6	HBA1	Hemoglobin subunit alpha OS=Homo sapiens GN=HBA1 PE=1 SV=2	5260.68	12.361
Q9UKX3	143	23	MYH13	Myosin-13 OS=Homo sapiens GN=MYH13 PE=2 SV=2	5255.31	12.3596
P04114	345	91	APOB	Apolipoprotein B-100 OS=Homo sapiens GN=APOB PE=1 SV=2	5230.37	12.3527
Q03252	159	58	LMNB2	Lamin-B2 OS=Homo sapiens GN=LMNB2 PE=1 SV=4	5123.2	12.3228
P00505	90	54	GOT2	Aspartate aminotransferase_ mitochondrial OS=Homo sapiens GN=GOT2 PE=1 SV=3	5091.25	12.3138
Q9BWD1	70	36	ACAT2	Acetyl-CoA acetyltransferase_ cytosolic OS=Homo sapiens GN=ACAT2 PE=1 SV=2	5085.64	12.3122
O43707	200	42	ACTN4	Alpha-actinin-4 OS=Homo sapiens GN=ACTN4 PE=1 SV=2	5004.59	12.289
Q5T4S7	184	45	UBR4	E3 ubiquitin-protein ligase UBR4 OS=Homo sapiens GN=UBR4 PE=1 SV=1	4996.12	12.2866
Q13283	57	23	G3BP1	Ras GTPase-activating protein-binding protein 1 OS=Homo sapiens GN=G3BP1 PE=1 SV=1	4992.08	12.2854
P04843	101	21	RPN1	Dolichyl-diphosphooligosaccharide--protein glycosyltransferase subunit 1 OS=Homo sapiens GN=RPN1 PE=1 SV=1	4965.57	12.2777
Q9Y2H0	44	7	DLGAP4	Disks large-associated protein 4 OS=Homo sapiens GN=DLGAP4 PE=1 SV=3	4959.11	12.2759
P08195	84	14	SLC3A2	4F2 cell-surface antigen heavy chain OS=Homo sapiens GN=SLC3A2 PE=1 SV=3	4950.69	12.2734
P51812	39	5	RPS6KA3	Ribosomal protein S6 kinase alpha-3 OS=Homo sapiens GN=RPS6KA3 PE=1 SV=1	4899	12.2583
P45880	50	20	VDAC2	Voltage-dependent anion-selective channel protein 2 OS=Homo sapiens GN=VDAC2 PE=1 SV=2	4895.53	12.2573
Q8TDW7	103	3	FAT3	Protocadherin Fat 3 OS=Homo sapiens GN=FAT3 PE=2 SV=2	4874.37	12.251
O43175	112	55	PHGDH	D-3-phosphoglycerate dehydrogenase OS=Homo sapiens GN=PHGDH PE=1 SV=4	4864.93	12.2482
C9K0S6	7	3	TUBA8	Tubulin alpha-8 chain (Fragment) OS=Homo sapiens GN=TUBA8 PE=1 SV=1	4811.62	12.2323
O95996	121	23	APC2	Adenomatous polyposis coli protein 2 OS=Homo sapiens GN=APC2 PE=1 SV=1	4790.65	12.226
P68133	68	2	ACTA1	Actin_ alpha skeletal muscle OS=Homo sapiens GN=ACTA1 PE=1 SV=1	4720.9	12.2048
Q9Y6V0	218	51	PCLO	Protein piccolo OS=Homo sapiens GN=PCLO PE=1 SV=4	4708.29	12.201
Q9BVK6	11	6	TMED9	Transmembrane emp24 domain-containing protein 9 OS=Homo sapiens GN=TMED9 PE=1 SV=2	4667.42	12.1884
Q5T7N2	153	79	L1TD1	LINE-1 type transposase domain-containing protein 1 OS=Homo sapiens GN=L1TD1 PE=1 SV=1	4660.89	12.1864
P35908	167	65	KRT2	Keratin_ type II cytoskeletal 2 epidermal OS=Homo sapiens GN=KRT2 PE=1 SV=2	4642.28	12.1806
Q8NG97	2	2	OR2Z1	Olfactory receptor 2Z1 OS=Homo sapiens GN=OR2Z1 PE=2 SV=1	4605.2	12.169
Q9NSD9	68	29	FARSB	Phenylalanine--tRNA ligase beta subunit OS=Homo sapiens GN=FARSB PE=1 SV=3	4600	12.1674
H0Y786	479	132	NEB	Nebulin (Fragment) OS=Homo sapiens GN=NEB PE=1 SV=1	4541.17	12.1488
P07814	164	37	EPRS	Bifunctional glutamate/proline--tRNA ligase OS=Homo sapiens GN=EPRS PE=1 SV=5	4492.93	12.1334
Q14204	681	278	DYNC1H1	Cytoplasmic dynein 1 heavy chain 1 OS=Homo sapiens GN=DYNC1H1 PE=1 SV=5	4483.36	12.1304
P14625	286	104	HSP90B1	Endoplasmin OS=Homo sapiens GN=HSP90B1 PE=1 SV=1	4411.45	12.107
Q9P2J5	144	45	LARS	Leucine--tRNA ligase_ cytoplasmic OS=Homo sapiens GN=LARS PE=1 SV=2	4349.89	12.0868
Q5T5U3	139	10	ARHGAP21	Rho GTPase-activating protein 21 OS=Homo sapiens GN=ARHGAP21 PE=1 SV=1	4253.16	12.0543
P61160	52	15	ACTR2	Actin-related protein 2 OS=Homo sapiens GN=ACTR2 PE=1 SV=1	4248.91	12.0529
H7BZJ3	19	8	PDIA3	Protein disulfide-isomerase A3 (Fragment) OS=Homo sapiens GN=PDIA3 PE=1 SV=1	4235.81	12.0484
P23526	96	43	AHCY	Adenosylhomocysteinase OS=Homo sapiens GN=AHCY PE=1 SV=4	4235.28	12.0482
Q9BUF5	118	48	TUBB6	Tubulin beta-6 chain OS=Homo sapiens GN=TUBB6 PE=1 SV=1	4205.29	12.038
Q9BVA1	102	19	TUBB2B	Tubulin beta-2B chain OS=Homo sapiens GN=TUBB2B PE=1 SV=1	4199.96	12.0362
Q9NYB0	31	11	TERF2IP	Telomeric repeat-binding factor 2-interacting protein 1 OS=Homo sapiens GN=TERF2IP PE=1 SV=1	4189.39	12.0325
Q96N67	151	32	DOCK7	Dedicator of cytokinesis protein 7 OS=Homo sapiens GN=DOCK7 PE=1 SV=4	4160.03	12.0224
P09104	128	31	ENO2	Gamma-enolase OS=Homo sapiens GN=ENO2 PE=1 SV=3	4148.83	12.0185
P0DME0	60	22	SETSIP	Protein SETSIP OS=Homo sapiens GN=SETSIP PE=1 SV=1	4118.06	12.0077
P60709	183	50	ACTB	Actin_ cytoplasmic 1 OS=Homo sapiens GN=ACTB PE=1 SV=1	4106.96	12.0039
P12277	194	80	CKB	Creatine kinase B-type OS=Homo sapiens GN=CKB PE=1 SV=1	4086.12	11.9965
Q96QK1	72	32	VPS35	Vacuolar protein sorting-associated protein 35 OS=Homo sapiens GN=VPS35 PE=1 SV=2	4072.64	11.9917
Q8NDA2	134	26	HMCN2	Hemicentin-2 OS=Homo sapiens GN=HMCN2 PE=2 SV=3	4060.96	11.9876
O60486	69	6	PLXNC1	Plexin-C1 OS=Homo sapiens GN=PLXNC1 PE=1 SV=1	4046.42	11.9824
P08727	121	34	KRT19	Keratin_ type I cytoskeletal 19 OS=Homo sapiens GN=KRT19 PE=1 SV=4	3995.17	11.964
O75533	153	52	SF3B1	Splicing factor 3B subunit 1 OS=Homo sapiens GN=SF3B1 PE=1 SV=3	3974.65	11.9566
Q8WUM0	36	11	NUP133	Nuclear pore complex protein Nup133 OS=Homo sapiens GN=NUP133 PE=1 SV=2	3969.22	11.9546
Q86VM9	99	6	ZC3H18	Zinc finger CCCH domain-containing protein 18 OS=Homo sapiens GN=ZC3H18 PE=1 SV=2	3944.83	11.9457
P49792	303	60	RANBP2	E3 SUMO-protein ligase RanBP2 OS=Homo sapiens GN=RANBP2 PE=1 SV=2	3921.98	11.9374
P23246	151	42	SFPQ	Splicing factor_ proline- and glutamine-rich OS=Homo sapiens GN=SFPQ PE=1 SV=2	3861.14	11.9148
Q15413	325	10	RYR3	Ryanodine receptor 3 OS=Homo sapiens GN=RYR3 PE=1 SV=3	3815.76	11.8978
P31946	110	46	YWHAB	14-3-3 protein beta/alpha OS=Homo sapiens GN=YWHAB PE=1 SV=3	3801.24	11.8923
P49411	94	46	TUFM	Elongation factor Tu_ mitochondrial OS=Homo sapiens GN=TUFM PE=1 SV=2	3791.22	11.8884
P40227	120	54	CCT6A	T-complex protein 1 subunit zeta OS=Homo sapiens GN=CCT6A PE=1 SV=3	3775.35	11.8824
P49006	26	8	MARCKSL1	MARCKS-related protein OS=Homo sapiens GN=MARCKSL1 PE=1 SV=2	3773.34	11.8816
Q6AHZ1	55	12	ZNF518A	Zinc finger protein 518A OS=Homo sapiens GN=ZNF518A PE=1 SV=2	3766.28	11.8789
P35579	404	149	MYH9	Myosin-9 OS=Homo sapiens GN=MYH9 PE=1 SV=4	3741.93	11.8696
P31930	54	23	UQCRC1	Cytochrome b-c1 complex subunit 1_ mitochondrial OS=Homo sapiens GN=UQCRC1 PE=1 SV=3	3739.36	11.8686
Q02790	112	49	FKBP4	Peptidyl-prolyl cis-trans isomerase FKBP4 OS=Homo sapiens GN=FKBP4 PE=1 SV=3	3714.08	11.8588
P43146	58	7	DCC	Netrin receptor DCC OS=Homo sapiens GN=DCC PE=1 SV=2	3708.2	11.8565
P49588	134	47	AARS	Alanine--tRNA ligase_ cytoplasmic OS=Homo sapiens GN=AARS PE=1 SV=2	3647.09	11.8325
O76003	22	8	GLRX3	Glutaredoxin-3 OS=Homo sapiens GN=GLRX3 PE=1 SV=2	3626.91	11.8245
Q8NCM8	263	68	DYNC2H1	Cytoplasmic dynein 2 heavy chain 1 OS=Homo sapiens GN=DYNC2H1 PE=1 SV=4	3608.32	11.8171
P15311	206	40	EZR	Ezrin OS=Homo sapiens GN=EZR PE=1 SV=4	3595.54	11.812
Q00610	286	56	CLTC	Clathrin heavy chain 1 OS=Homo sapiens GN=CLTC PE=1 SV=5	3580.68	11.806
Q14152	269	111	EIF3A	Eukaryotic translation initiation factor 3 subunit A OS=Homo sapiens GN=EIF3A PE=1 SV=1	3578.78	11.8053
P30101	162	88	PDIA3	Protein disulfide-isomerase A3 OS=Homo sapiens GN=PDIA3 PE=1 SV=4	3564.26	11.7994
Q96QZ7	33	2	MAGI1	Membrane-associated guanylate kinase_ WW and PDZ domain-containing protein 1 OS=Homo sapiens GN=MAGI1 PE=1 SV=3	3561.02	11.7981
Q8TDM6	133	20	DLG5	Disks large homolog 5 OS=Homo sapiens GN=DLG5 PE=1 SV=4	3543.84	11.7911
P54652	168	57	HSPA2	Heat shock-related 70 kDa protein 2 OS=Homo sapiens GN=HSPA2 PE=1 SV=1	3539.1	11.7892
Q8WUM4	109	40	PDCD6IP	Programmed cell death 6-interacting protein OS=Homo sapiens GN=PDCD6IP PE=1 SV=1	3520.85	11.7817
P51991	89	37	HNRNPA3	Heterogeneous nuclear ribonucleoprotein A3 OS=Homo sapiens GN=HNRNPA3 PE=1 SV=2	3507.43	11.7762
Q12955	523	150	ANK3	Ankyrin-3 OS=Homo sapiens GN=ANK3 PE=1 SV=3	3499.85	11.7731
P38159	103	19	RBMX	RNA-binding motif protein_ X chromosome OS=Homo sapiens GN=RBMX PE=1 SV=3	3487.12	11.7678
Q00005	25	2	PPP2R2B	Serine/threonine-protein phosphatase 2A 55 kDa regulatory subunit B beta isoform OS=Homo sapiens GN=PPP2R2B PE=1 SV=1	3460.51	11.7568
Q9BUJ2	50	2	HNRNPUL1	Heterogeneous nuclear ribonucleoprotein U-like protein 1 OS=Homo sapiens GN=HNRNPUL1 PE=1 SV=2	3459.87	11.7565
Q9UI36	19	2	DACH1	Dachshund homolog 1 OS=Homo sapiens GN=DACH1 PE=1 SV=3	3431.5	11.7446
Q14151	90	14	SAFB2	Scaffold attachment factor B2 OS=Homo sapiens GN=SAFB2 PE=1 SV=1	3405.45	11.7336
P08865	62	18	RPSA	40S ribosomal protein SA OS=Homo sapiens GN=RPSA PE=1 SV=4	3402.76	11.7325
P52272	246	38	HNRNPM	Heterogeneous nuclear ribonucleoprotein M OS=Homo sapiens GN=HNRNPM PE=1 SV=3	3381.3	11.7234
P09211	55	23	GSTP1	Glutathione S-transferase P OS=Homo sapiens GN=GSTP1 PE=1 SV=2	3362.53	11.7153
P21281	60	13	ATP6V1B2	V-type proton ATPase subunit B_ brain isoform OS=Homo sapiens GN=ATP6V1B2 PE=1 SV=3	3361.15	11.7147
E9PNZ4	173	6	MACF1	Microtubule-actin cross-linking factor 1_ isoforms 1/2/3/5 (Fragment) OS=Homo sapiens GN=MACF1 PE=1 SV=1	3352.87	11.7112
P11142	250	81	HSPA8	Heat shock cognate 71 kDa protein OS=Homo sapiens GN=HSPA8 PE=1 SV=1	3312.46	11.6937
Q9BTC0	74	14	DIDO1	Death-inducer obliterator 1 OS=Homo sapiens GN=DIDO1 PE=1 SV=5	3306.33	11.691
P41219	93	20	PRPH	Peripherin OS=Homo sapiens GN=PRPH PE=1 SV=2	3288.86	11.6834
Q13023	108	19	AKAP6	A-kinase anchor protein 6 OS=Homo sapiens GN=AKAP6 PE=1 SV=3	3249.13	11.6658
P48681	205	90	NES	Nestin OS=Homo sapiens GN=NES PE=1 SV=2	3224.75	11.655
Q96BY6	114	24	DOCK10	Dedicator of cytokinesis protein 10 OS=Homo sapiens GN=DOCK10 PE=1 SV=3	3193.67	11.641
P17174	65	33	GOT1	Aspartate aminotransferase_ cytoplasmic OS=Homo sapiens GN=GOT1 PE=1 SV=3	3182.93	11.6361
P50993	150	15	ATP1A2	Sodium/potassium-transporting ATPase subunit alpha-2 OS=Homo sapiens GN=ATP1A2 PE=1 SV=1	3175.38	11.6327
P08133	186	55	ANXA6	Annexin A6 OS=Homo sapiens GN=ANXA6 PE=1 SV=3	3173.12	11.6317
Q14694	44	11	USP10	Ubiquitin carboxyl-terminal hydrolase 10 OS=Homo sapiens GN=USP10 PE=1 SV=2	3171.12	11.6308
Q07021	33	13	C1QBP	Complement component 1 Q subcomponent-binding protein_ mitochondrial OS=Homo sapiens GN=C1QBP PE=1 SV=1	3162.01	11.6266
P07237	124	31	P4HB	Protein disulfide-isomerase OS=Homo sapiens GN=P4HB PE=1 SV=3	3151.36	11.6218
Q14683	185	7	SMC1A	Structural maintenance of chromosomes protein 1A OS=Homo sapiens GN=SMC1A PE=1 SV=2	3146.63	11.6196
Q7Z7L7	6	2	ZER1	Protein zer-1 homolog OS=Homo sapiens GN=ZER1 PE=1 SV=1	3132.59	11.6131
Q8N3D4	43	9	EHBP1L1	EH domain-binding protein 1-like protein 1 OS=Homo sapiens GN=EHBP1L1 PE=1 SV=2	3112.44	11.6038
Q8WXF1	57	13	PSPC1	Paraspeckle component 1 OS=Homo sapiens GN=PSPC1 PE=1 SV=1	3098.04	11.5971
P07197	183	30	NEFM	Neurofilament medium polypeptide OS=Homo sapiens GN=NEFM PE=1 SV=3	3091.65	11.5942
Q15643	228	15	TRIP11	Thyroid receptor-interacting protein 11 OS=Homo sapiens GN=TRIP11 PE=1 SV=3	3086.94	11.592
Q02952	140	57	AKAP12	A-kinase anchor protein 12 OS=Homo sapiens GN=AKAP12 PE=1 SV=4	3079.25	11.5884
O00231	67	28	PSMD11	26S proteasome non-ATPase regulatory subunit 11 OS=Homo sapiens GN=PSMD11 PE=1 SV=3	3077.78	11.5877
O15050	96	16	TRANK1	TPR and ankyrin repeat-containing protein 1 OS=Homo sapiens GN=TRANK1 PE=2 SV=4	3060.04	11.5793
Q13085	233	68	ACACA	Acetyl-CoA carboxylase 1 OS=Homo sapiens GN=ACACA PE=1 SV=2	3053.07	11.576
P26038	148	50	MSN	Moesin OS=Homo sapiens GN=MSN PE=1 SV=3	3053.05	11.576
P55884	101	29	EIF3B	Eukaryotic translation initiation factor 3 subunit B OS=Homo sapiens GN=EIF3B PE=1 SV=3	3050.01	11.5746
Q15393	124	43	SF3B3	Splicing factor 3B subunit 3 OS=Homo sapiens GN=SF3B3 PE=1 SV=4	3048.88	11.5741
P78344	115	8	EIF4G2	Eukaryotic translation initiation factor 4 gamma 2 OS=Homo sapiens GN=EIF4G2 PE=1 SV=1	3041.75	11.5707
Q15365	25	10	PCBP1	Poly(rC)-binding protein 1 OS=Homo sapiens GN=PCBP1 PE=1 SV=2	3036.22	11.5681
O15078	551	18	CEP290	Centrosomal protein of 290 kDa OS=Homo sapiens GN=CEP290 PE=1 SV=2	3019.09	11.5599
P16870	16	2	CPE	Carboxypeptidase E OS=Homo sapiens GN=CPE PE=1 SV=1	3008.33	11.5547
Q7Z4V5	54	12	HDGFL2	Hepatoma-derived growth factor-related protein 2 OS=Homo sapiens GN=HDGFL2 PE=1 SV=1	2993.22	11.5475
Q03468	50	10	ERCC6	DNA excision repair protein ERCC-6 OS=Homo sapiens GN=ERCC6 PE=1 SV=1	2990.15	11.546
P07355	81	10	ANXA2	Annexin A2 OS=Homo sapiens GN=ANXA2 PE=1 SV=2	2978.33	11.5403
Q14315	204	51	FLNC	Filamin-C OS=Homo sapiens GN=FLNC PE=1 SV=3	2978.33	11.5403
Q96L91	57	12	EP400	E1A-binding protein p400 OS=Homo sapiens GN=EP400 PE=1 SV=4	2975.19	11.5388
Q04917	52	12	YWHAH	14-3-3 protein eta OS=Homo sapiens GN=YWHAH PE=1 SV=4	2956.64	11.5297
P13639	263	134	EEF2	Elongation factor 2 OS=Homo sapiens GN=EEF2 PE=1 SV=4	2955.21	11.529
Q16658	110	50	FSCN1	Fascin OS=Homo sapiens GN=FSCN1 PE=1 SV=3	2944.68	11.5239
P19367	144	36	HK1	Hexokinase-1 OS=Homo sapiens GN=HK1 PE=1 SV=3	2942.81	11.523
Q02880	174	24	TOP2B	DNA topoisomerase 2-beta OS=Homo sapiens GN=TOP2B PE=1 SV=3	2941.6	11.5224
P62805	51	29	HIST1H4A	Histone H4 OS=Homo sapiens GN=HIST1H4A PE=1 SV=2	2939.96	11.5216
Q9NQU5	4	2	PAK6	Serine/threonine-protein kinase PAK 6 OS=Homo sapiens GN=PAK6 PE=1 SV=1	2935.79	11.5195
P53396	125	52	ACLY	ATP-citrate synthase OS=Homo sapiens GN=ACLY PE=1 SV=3	2926.27	11.5148
Q9UDR5	121	29	AASS	Alpha-aminoadipic semialdehyde synthase_ mitochondrial OS=Homo sapiens GN=AASS PE=1 SV=1	2919.15	11.5113
P38919	136	66	EIF4A3	Eukaryotic initiation factor 4A-III OS=Homo sapiens GN=EIF4A3 PE=1 SV=4	2918.86	11.5112
P42704	208	78	LRPPRC	Leucine-rich PPR motif-containing protein_ mitochondrial OS=Homo sapiens GN=LRPPRC PE=1 SV=3	2915.05	11.5093
P25054	258	35	APC	Adenomatous polyposis coli protein OS=Homo sapiens GN=APC PE=1 SV=2	2904.52	11.5041
P04899	46	10	GNAI2	Guanine nucleotide-binding protein G(i) subunit alpha-2 OS=Homo sapiens GN=GNAI2 PE=1 SV=3	2901.52	11.5026
P19174	93	25	PLCG1	1-phosphatidylinositol 4_5-bisphosphate phosphodiesterase gamma-1 OS=Homo sapiens GN=PLCG1 PE=1 SV=1	2898.32	11.501
P13667	157	94	PDIA4	Protein disulfide-isomerase A4 OS=Homo sapiens GN=PDIA4 PE=1 SV=2	2895.13	11.4994
P36542	39	16	ATP5C1	ATP synthase subunit gamma_ mitochondrial OS=Homo sapiens GN=ATP5C1 PE=1 SV=1	2879.85	11.4918
Q13885	63	8	TUBB2A	Tubulin beta-2A chain OS=Homo sapiens GN=TUBB2A PE=1 SV=1	2869.6	11.4866
Q15233	134	33	NONO	Non-POU domain-containing octamer-binding protein OS=Homo sapiens GN=NONO PE=1 SV=4	2869.49	11.4866
O43143	99	40	DHX15	Pre-mRNA-splicing factor ATP-dependent RNA helicase DHX15 OS=Homo sapiens GN=DHX15 PE=1 SV=2	2852.93	11.4782
Q8NBS9	38	11	TXNDC5	Thioredoxin domain-containing protein 5 OS=Homo sapiens GN=TXNDC5 PE=1 SV=2	2848.05	11.4758
P29401	155	48	TKT	Transketolase OS=Homo sapiens GN=TKT PE=1 SV=3	2836.31	11.4698
Q08945	95	28	SSRP1	FACT complex subunit SSRP1 OS=Homo sapiens GN=SSRP1 PE=1 SV=1	2832.47	11.4678
P60174	83	32	TPI1	Triosephosphate isomerase OS=Homo sapiens GN=TPI1 PE=1 SV=3	2829.38	11.4663
Q9NZR2	58	6	LRP1B	Low-density lipoprotein receptor-related protein 1B OS=Homo sapiens GN=LRP1B PE=1 SV=2	2823.19	11.4631
Q9BY11	46	7	PACSIN1	Protein kinase C and casein kinase substrate in neurons protein 1 OS=Homo sapiens GN=PACSIN1 PE=1 SV=1	2813.93	11.4584
Q5S007	132	23	LRRK2	Leucine-rich repeat serine/threonine-protein kinase 2 OS=Homo sapiens GN=LRRK2 PE=1 SV=2	2795.87	11.4491
Q8WXI9	62	2	GATAD2B	Transcriptional repressor p66-beta OS=Homo sapiens GN=GATAD2B PE=1 SV=1	2789.85	11.446
Q6NUK1	15	5	SLC25A24	Calcium-binding mitochondrial carrier protein SCaMC-1 OS=Homo sapiens GN=SLC25A24 PE=1 SV=2	2786.64	11.4443
P00451	92	18	F8	Coagulation factor VIII OS=Homo sapiens GN=F8 PE=1 SV=1	2779.18	11.4404
Q07666	59	17	KHDRBS1	KH domain-containing_ RNA-binding_ signal transduction-associated protein 1 OS=Homo sapiens GN=KHDRBS1 PE=1 SV=1	2767.74	11.4345
Q9P258	48	22	RCC2	Protein RCC2 OS=Homo sapiens GN=RCC2 PE=1 SV=2	2767.51	11.4344
O14529	64	13	CUX2	Homeobox protein cut-like 2 OS=Homo sapiens GN=CUX2 PE=1 SV=4	2755.7	11.4282
Q8TE73	217	41	DNAH5	Dynein heavy chain 5_ axonemal OS=Homo sapiens GN=DNAH5 PE=1 SV=3	2739.63	11.4198
Q9NR48	146	30	ASH1L	Histone-lysine N-methyltransferase ASH1L OS=Homo sapiens GN=ASH1L PE=1 SV=2	2739.51	11.4197
P49748	36	6	ACADVL	Very long-chain specific acyl-CoA dehydrogenase_ mitochondrial OS=Homo sapiens GN=ACADVL PE=1 SV=1	2732.32	11.4159
P04216	7	2	THY1	Thy-1 membrane glycoprotein OS=Homo sapiens GN=THY1 PE=1 SV=2	2729.25	11.4143
Q0VDD8	141	30	DNAH14	Dynein heavy chain 14_ axonemal OS=Homo sapiens GN=DNAH14 PE=2 SV=3	2729.02	11.4142
Q8WUD1	37	12	RAB2B	Ras-related protein Rab-2B OS=Homo sapiens GN=RAB2B PE=1 SV=1	2710.53	11.4044
O75400	80	25	PRPF40A	Pre-mRNA-processing factor 40 homolog A OS=Homo sapiens GN=PRPF40A PE=1 SV=2	2695.3	11.3962
P11532	414	10	DMD	Dystrophin OS=Homo sapiens GN=DMD PE=1 SV=3	2690.1	11.3934
Q08211	189	82	DHX9	ATP-dependent RNA helicase A OS=Homo sapiens GN=DHX9 PE=1 SV=4	2679.46	11.3877
P34932	199	61	HSPA4	Heat shock 70 kDa protein 4 OS=Homo sapiens GN=HSPA4 PE=1 SV=4	2670.44	11.3829
P07205	83	27	PGK2	Phosphoglycerate kinase 2 OS=Homo sapiens GN=PGK2 PE=1 SV=3	2668.41	11.3818
Q14103	76	20	HNRNPD	Heterogeneous nuclear ribonucleoprotein D0 OS=Homo sapiens GN=HNRNPD PE=1 SV=1	2663.76	11.3792
P11277	131	22	SPTB	Spectrin beta chain_ erythrocytic OS=Homo sapiens GN=SPTB PE=1 SV=5	2657.9	11.3761
P20700	228	58	LMNB1	Lamin-B1 OS=Homo sapiens GN=LMNB1 PE=1 SV=2	2648.24	11.3708
P12270	341	92	TPR	Nucleoprotein TPR OS=Homo sapiens GN=TPR PE=1 SV=3	2646.78	11.37
P50395	160	66	GDI2	Rab GDP dissociation inhibitor beta OS=Homo sapiens GN=GDI2 PE=1 SV=2	2638.53	11.3655
Q8IVD9	27	8	NUDCD3	NudC domain-containing protein 3 OS=Homo sapiens GN=NUDCD3 PE=1 SV=3	2637.92	11.3652
Q9P225	284	64	DNAH2	Dynein heavy chain 2_ axonemal OS=Homo sapiens GN=DNAH2 PE=2 SV=3	2634.83	11.3635
P10909	59	8	CLU	Clusterin OS=Homo sapiens GN=CLU PE=1 SV=1	2618.92	11.3548
P78371	164	36	CCT2	T-complex protein 1 subunit beta OS=Homo sapiens GN=CCT2 PE=1 SV=4	2604.5	11.3468
Q8IYW2	20	2	CFAP46	Cilia- and flagella-associated protein 46 OS=Homo sapiens GN=CFAP46 PE=2 SV=3	2601.75	11.3453
P02549	228	46	SPTA1	Spectrin alpha chain_ erythrocytic 1 OS=Homo sapiens GN=SPTA1 PE=1 SV=5	2592.43	11.3401
P26639	85	30	TARS	Threonine--tRNA ligase_ cytoplasmic OS=Homo sapiens GN=TARS PE=1 SV=3	2591.32	11.3395
Q86VS8	46	9	HOOK3	Protein Hook homolog 3 OS=Homo sapiens GN=HOOK3 PE=1 SV=2	2590.37	11.3389
P46100	152	27	ATRX	Transcriptional regulator ATRX OS=Homo sapiens GN=ATRX PE=1 SV=5	2585.46	11.3362
P98164	60	14	LRP2	Low-density lipoprotein receptor-related protein 2 OS=Homo sapiens GN=LRP2 PE=1 SV=3	2583.53	11.3351
O00425	89	40	IGF2BP3	Insulin-like growth factor 2 mRNA-binding protein 3 OS=Homo sapiens GN=IGF2BP3 PE=1 SV=2	2570.45	11.3278
P30086	44	25	PEBP1	Phosphatidylethanolamine-binding protein 1 OS=Homo sapiens GN=PEBP1 PE=1 SV=3	2566.72	11.3257
Q14980	382	21	NUMA1	Nuclear mitotic apparatus protein 1 OS=Homo sapiens GN=NUMA1 PE=1 SV=2	2560.86	11.3224
Q58FF6	47	10	HSP90AB4P	Putative heat shock protein HSP 90-beta 4 OS=Homo sapiens GN=HSP90AB4P PE=5 SV=1	2555.91	11.3196
P13611	144	19	VCAN	Versican core protein OS=Homo sapiens GN=VCAN PE=1 SV=3	2545.53	11.3138
P13693	23	5	TPT1	Translationally-controlled tumor protein OS=Homo sapiens GN=TPT1 PE=1 SV=1	2539.92	11.3106
Q99996	551	26	AKAP9	A-kinase anchor protein 9 OS=Homo sapiens GN=AKAP9 PE=1 SV=3	2532.27	11.3062
Q7LC44	14	3	ARC	Activity-regulated cytoskeleton-associated protein OS=Homo sapiens GN=ARC PE=2 SV=1	2503.72	11.2899
Q8IX30	7	2	SCUBE3	Signal peptide_ CUB and EGF-like domain-containing protein 3 OS=Homo sapiens GN=SCUBE3 PE=1 SV=1	2500.25	11.2879
P27708	160	14	CAD	CAD protein OS=Homo sapiens GN=CAD PE=1 SV=3	2500.05	11.2877
Q12906	160	51	ILF3	Interleukin enhancer-binding factor 3 OS=Homo sapiens GN=ILF3 PE=1 SV=3	2498.06	11.2866
P78559	174	6	MAP1A	Microtubule-associated protein 1A OS=Homo sapiens GN=MAP1A PE=1 SV=6	2490.6	11.2823
Q9ULM3	30	7	YEATS2	YEATS domain-containing protein 2 OS=Homo sapiens GN=YEATS2 PE=1 SV=2	2477.74	11.2748
P40145	14	2	ADCY8	Adenylate cyclase type 8 OS=Homo sapiens GN=ADCY8 PE=1 SV=1	2473.24	11.2722
P08670	242	68	VIM	Vimentin OS=Homo sapiens GN=VIM PE=1 SV=4	2462.64	11.266
O94925	24	3	GLS	Glutaminase kidney isoform_ mitochondrial OS=Homo sapiens GN=GLS PE=1 SV=1	2460.26	11.2646
Q16795	10	2	NDUFA9	NADH dehydrogenase [ubiquinone] 1 alpha subcomplex subunit 9_ mitochondrial OS=Homo sapiens GN=NDUFA9 PE=1 SV=2	2459.1	11.2639
O00592	23	8	PODXL	Podocalyxin OS=Homo sapiens GN=PODXL PE=1 SV=2	2450.67	11.259
Q9UQE7	225	80	SMC3	Structural maintenance of chromosomes protein 3 OS=Homo sapiens GN=SMC3 PE=1 SV=2	2436.59	11.2506
Q8NF50	92	17	DOCK8	Dedicator of cytokinesis protein 8 OS=Homo sapiens GN=DOCK8 PE=1 SV=3	2436.08	11.2503
Q15424	103	23	SAFB	Scaffold attachment factor B1 OS=Homo sapiens GN=SAFB PE=1 SV=4	2418.23	11.2397
P62987	54	16	UBA52	Ubiquitin-60S ribosomal protein L40 OS=Homo sapiens GN=UBA52 PE=1 SV=2	2417.3	11.2392
P29966	80	32	MARCKS	Myristoylated alanine-rich C-kinase substrate OS=Homo sapiens GN=MARCKS PE=1 SV=4	2415.51	11.2381
Q9BTE3	11	3	MCMBP	Mini-chromosome maintenance complex-binding protein OS=Homo sapiens GN=MCMBP PE=1 SV=2	2387.86	11.2215
Q9C0C2	148	54	TNKS1BP1	182 kDa tankyrase-1-binding protein OS=Homo sapiens GN=TNKS1BP1 PE=1 SV=4	2379.85	11.2167
Q16720	63	7	ATP2B3	Plasma membrane calcium-transporting ATPase 3 OS=Homo sapiens GN=ATP2B3 PE=1 SV=3	2378.67	11.2159
Q9NQX4	127	25	MYO5C	Unconventional myosin-Vc OS=Homo sapiens GN=MYO5C PE=1 SV=2	2375.26	11.2139
Q7Z406	292	55	MYH14	Myosin-14 OS=Homo sapiens GN=MYH14 PE=1 SV=2	2369.67	11.2105
Q07065	117	47	CKAP4	Cytoskeleton-associated protein 4 OS=Homo sapiens GN=CKAP4 PE=1 SV=2	2359.45	11.2042
P51151	7	2	RAB9A	Ras-related protein Rab-9A OS=Homo sapiens GN=RAB9A PE=1 SV=1	2359.06	11.204
Q7Z333	100	24	SETX	Probable helicase senataxin OS=Homo sapiens GN=SETX PE=1 SV=4	2330.63	11.1865
P62937	73	39	PPIA	Peptidyl-prolyl cis-trans isomerase A OS=Homo sapiens GN=PPIA PE=1 SV=2	2323.77	11.1823
P31948	189	73	STIP1	Stress-induced-phosphoprotein 1 OS=Homo sapiens GN=STIP1 PE=1 SV=1	2318.62	11.179
Q07954	107	23	LRP1	Prolow-density lipoprotein receptor-related protein 1 OS=Homo sapiens GN=LRP1 PE=1 SV=2	2317.4	11.1783
O15020	359	88	SPTBN2	Spectrin beta chain_ non-erythrocytic 2 OS=Homo sapiens GN=SPTBN2 PE=1 SV=3	2310.74	11.1741
Q13838	109	20	DDX39B	Spliceosome RNA helicase DDX39B OS=Homo sapiens GN=DDX39B PE=1 SV=1	2290.4	11.1614
O95155	67	13	UBE4B	Ubiquitin conjugation factor E4 B OS=Homo sapiens GN=UBE4B PE=1 SV=1	2284.74	11.1578
Q8IWZ8	34	12	SUGP1	SURP and G-patch domain-containing protein 1 OS=Homo sapiens GN=SUGP1 PE=1 SV=2	2276.81	11.1528
K7EK60	27	2	FMNL1	Formin-like protein 1 OS=Homo sapiens GN=FMNL1 PE=1 SV=1	2270.65	11.1489
Q86VH2	79	16	KIF27	Kinesin-like protein KIF27 OS=Homo sapiens GN=KIF27 PE=2 SV=1	2266.47	11.1462
P49327	322	71	FASN	Fatty acid synthase OS=Homo sapiens GN=FASN PE=1 SV=3	2265.77	11.1458
Q3V6T2	250	32	CCDC88A	Girdin OS=Homo sapiens GN=CCDC88A PE=1 SV=2	2255.66	11.1393
Q92896	81	12	GLG1	Golgi apparatus protein 1 OS=Homo sapiens GN=GLG1 PE=1 SV=2	2247.01	11.1338
Q13151	24	11	HNRNPA0	Heterogeneous nuclear ribonucleoprotein A0 OS=Homo sapiens GN=HNRNPA0 PE=1 SV=1	2242.27	11.1307
P27824	81	25	CANX	Calnexin OS=Homo sapiens GN=CANX PE=1 SV=2	2241.65	11.1303
Q96L73	69	11	NSD1	Histone-lysine N-methyltransferase_ H3 lysine-36 and H4 lysine-20 specific OS=Homo sapiens GN=NSD1 PE=1 SV=1	2222.52	11.118
P31689	39	10	DNAJA1	DnaJ homolog subfamily A member 1 OS=Homo sapiens GN=DNAJA1 PE=1 SV=2	2217.2	11.1145
P09936	47	8	UCHL1	Ubiquitin carboxyl-terminal hydrolase isozyme L1 OS=Homo sapiens GN=UCHL1 PE=1 SV=2	2212.79	11.1116
Q9Y617	78	51	PSAT1	Phosphoserine aminotransferase OS=Homo sapiens GN=PSAT1 PE=1 SV=2	2205.99	11.1072
Q9UBB4	43	7	ATXN10	Ataxin-10 OS=Homo sapiens GN=ATXN10 PE=1 SV=1	2202.47	11.1049
P05771	31	4	PRKCB	Protein kinase C beta type OS=Homo sapiens GN=PRKCB PE=1 SV=4	2194.51	11.0997
P23921	77	21	RRM1	Ribonucleoside-diphosphate reductase large subunit OS=Homo sapiens GN=RRM1 PE=1 SV=1	2187.93	11.0954
P04075	125	45	ALDOA	Fructose-bisphosphate aldolase A OS=Homo sapiens GN=ALDOA PE=1 SV=2	2181.63	11.0912
Q5TZA2	320	36	CROCC	Rootletin OS=Homo sapiens GN=CROCC PE=1 SV=1	2173.68	11.0859
O14979	41	3	HNRNPDL	Heterogeneous nuclear ribonucleoprotein D-like OS=Homo sapiens GN=HNRNPDL PE=1 SV=3	2169.07	11.0829
Q7Z460	124	10	CLASP1	CLIP-associating protein 1 OS=Homo sapiens GN=CLASP1 PE=1 SV=1	2166.75	11.0813
Q92616	71	20	GCN1	eIF-2-alpha kinase activator GCN1 OS=Homo sapiens GN=GCN1 PE=1 SV=6	2150.53	11.0705
P46939	306	67	UTRN	Utrophin OS=Homo sapiens GN=UTRN PE=1 SV=2	2138.88	11.0626
P38606	125	51	ATP6V1A	V-type proton ATPase catalytic subunit A OS=Homo sapiens GN=ATP6V1A PE=1 SV=2	2138.79	11.0626
P26640	108	7	VARS	Valine--tRNA ligase OS=Homo sapiens GN=VARS PE=1 SV=4	2129.93	11.0566
P19338	214	81	NCL	Nucleolin OS=Homo sapiens GN=NCL PE=1 SV=3	2125.95	11.0539
Q15813	14	5	TBCE	Tubulin-specific chaperone E OS=Homo sapiens GN=TBCE PE=1 SV=1	2124.91	11.0532
O14802	35	5	POLR3A	DNA-directed RNA polymerase III subunit RPC1 OS=Homo sapiens GN=POLR3A PE=1 SV=2	2124.49	11.0529
Q12789	104	20	GTF3C1	General transcription factor 3C polypeptide 1 OS=Homo sapiens GN=GTF3C1 PE=1 SV=4	2118.52	11.0488
Q86VP6	132	35	CAND1	Cullin-associated NEDD8-dissociated protein 1 OS=Homo sapiens GN=CAND1 PE=1 SV=2	2117.71	11.0483
Q6ZU52	19	3	KIAA0408	Uncharacterized protein KIAA0408 OS=Homo sapiens GN=KIAA0408 PE=1 SV=1	2117.51	11.0482
O75976	51	13	CPD	Carboxypeptidase D OS=Homo sapiens GN=CPD PE=1 SV=2	2110.52	11.0434
P22314	159	69	UBA1	Ubiquitin-like modifier-activating enzyme 1 OS=Homo sapiens GN=UBA1 PE=1 SV=3	2106.19	11.0404
Q9H6N6	98	18	MYH16	Putative uncharacterized protein MYH16 OS=Homo sapiens GN=MYH16 PE=1 SV=2	2100.71	11.0367
Q96RL7	127	31	VPS13A	Vacuolar protein sorting-associated protein 13A OS=Homo sapiens GN=VPS13A PE=1 SV=2	2085.34	11.0261
P07195	173	70	LDHB	L-lactate dehydrogenase B chain OS=Homo sapiens GN=LDHB PE=1 SV=2	2084.52	11.0255
P63104	109	26	YWHAZ	14-3-3 protein zeta/delta OS=Homo sapiens GN=YWHAZ PE=1 SV=1	2077.7	11.0208
Q9H269	19	3	VPS16	Vacuolar protein sorting-associated protein 16 homolog OS=Homo sapiens GN=VPS16 PE=1 SV=2	2074.36	11.0184
Q68DQ2	188	42	CRYBG3	Very large A-kinase anchor protein OS=Homo sapiens GN=CRYBG3 PE=1 SV=3	2072.7	11.0173
Q9UBP0	9	2	SPAST	Spastin OS=Homo sapiens GN=SPAST PE=1 SV=1	2070.17	11.0155
E7EVA0	280	37	MAP4	Microtubule-associated protein OS=Homo sapiens GN=MAP4 PE=1 SV=1	2064.54	11.0116
P09471	71	12	GNAO1	Guanine nucleotide-binding protein G(o) subunit alpha OS=Homo sapiens GN=GNAO1 PE=1 SV=4	2053.44	11.0038
P10768	23	5	ESD	S-formylglutathione hydrolase OS=Homo sapiens GN=ESD PE=1 SV=2	2051.28	11.0023
Q9P2P6	199	37	STARD9	StAR-related lipid transfer protein 9 OS=Homo sapiens GN=STARD9 PE=1 SV=3	2044.82	10.9978
P51858	44	13	HDGF	Hepatoma-derived growth factor OS=Homo sapiens GN=HDGF PE=1 SV=1	2039.73	10.9942
Q8NHW5	55	16	RPLP0P6	60S acidic ribosomal protein P0-like OS=Homo sapiens GN=RPLP0P6 PE=5 SV=1	2038.83	10.9935
O00154	45	17	ACOT7	Cytosolic acyl coenzyme A thioester hydrolase OS=Homo sapiens GN=ACOT7 PE=1 SV=3	2029.32	10.9868
O15085	28	6	ARHGEF11	Rho guanine nucleotide exchange factor 11 OS=Homo sapiens GN=ARHGEF11 PE=1 SV=1	2027.16	10.9852
Q14690	41	5	PDCD11	Protein RRP5 homolog OS=Homo sapiens GN=PDCD11 PE=1 SV=3	2017.2	10.9781
P24752	44	11	ACAT1	Acetyl-CoA acetyltransferase_ mitochondrial OS=Homo sapiens GN=ACAT1 PE=1 SV=1	2010.42	10.9733
Q9P227	61	11	ARHGAP23	Rho GTPase-activating protein 23 OS=Homo sapiens GN=ARHGAP23 PE=1 SV=2	1997.34	10.9639
O14974	118	9	PPP1R12A	Protein phosphatase 1 regulatory subunit 12A OS=Homo sapiens GN=PPP1R12A PE=1 SV=1	1992.34	10.9602
P55060	105	55	CSE1L	Exportin-2 OS=Homo sapiens GN=CSE1L PE=1 SV=3	1987.57	10.9568
Q8IZX4	57	5	TAF1L	Transcription initiation factor TFIID subunit 1-like OS=Homo sapiens GN=TAF1L PE=1 SV=1	1986.19	10.9558
P27348	86	21	YWHAQ	14-3-3 protein theta OS=Homo sapiens GN=YWHAQ PE=1 SV=1	1983.48	10.9538
Q9NRF8	29	9	CTPS2	CTP synthase 2 OS=Homo sapiens GN=CTPS2 PE=1 SV=1	1979.66	10.951
P61981	77	25	YWHAG	14-3-3 protein gamma OS=Homo sapiens GN=YWHAG PE=1 SV=2	1978.23	10.95
Q9UPS8	97	4	ANKRD26	Ankyrin repeat domain-containing protein 26 OS=Homo sapiens GN=ANKRD26 PE=1 SV=3	1970.08	10.944
Q6ZTR5	85	2	CFAP47	Cilia- and flagella-associated protein 47 OS=Homo sapiens GN=CFAP47 PE=2 SV=4	1968.56	10.9429
O75643	203	57	SNRNP200	U5 small nuclear ribonucleoprotein 200 kDa helicase OS=Homo sapiens GN=SNRNP200 PE=1 SV=2	1962.8	10.9387
P10155	45	11	TROVE2	60 kDa SS-A/Ro ribonucleoprotein OS=Homo sapiens GN=TROVE2 PE=1 SV=2	1954.28	10.9324
O60313	144	11	OPA1	Dynamin-like 120 kDa protein_ mitochondrial OS=Homo sapiens GN=OPA1 PE=1 SV=3	1953.76	10.932
Q9HC10	51	10	OTOF	Otoferlin OS=Homo sapiens GN=OTOF PE=1 SV=3	1953.61	10.9319
Q9H254	183	5	SPTBN4	Spectrin beta chain_ non-erythrocytic 4 OS=Homo sapiens GN=SPTBN4 PE=1 SV=2	1947.99	10.9278
Q92576	77	9	PHF3	PHD finger protein 3 OS=Homo sapiens GN=PHF3 PE=1 SV=3	1936.9	10.9195
P28074	32	13	PSMB5	Proteasome subunit beta type-5 OS=Homo sapiens GN=PSMB5 PE=1 SV=3	1927.62	10.9126
P04350	65	11	TUBB4A	Tubulin beta-4A chain OS=Homo sapiens GN=TUBB4A PE=1 SV=2	1927.38	10.9124
A2RRP1	79	10	NBAS	Neuroblastoma-amplified sequence OS=Homo sapiens GN=NBAS PE=1 SV=2	1921.97	10.9084
P12235	53	10	SLC25A4	ADP/ATP translocase 1 OS=Homo sapiens GN=SLC25A4 PE=1 SV=4	1918.05	10.9054
P50454	121	30	SERPINH1	Serpin H1 OS=Homo sapiens GN=SERPINH1 PE=1 SV=2	1915.69	10.9037
Q8TEK3	43	8	DOT1L	Histone-lysine N-methyltransferase_ H3 lysine-79 specific OS=Homo sapiens GN=DOT1L PE=1 SV=2	1906.37	10.8966
P40937	10	2	RFC5	Replication factor C subunit 5 OS=Homo sapiens GN=RFC5 PE=1 SV=1	1906.31	10.8966
Q9BYW2	99	14	SETD2	Histone-lysine N-methyltransferase SETD2 OS=Homo sapiens GN=SETD2 PE=1 SV=3	1900.83	10.8924
P35749	308	84	MYH11	Myosin-11 OS=Homo sapiens GN=MYH11 PE=1 SV=3	1890.34	10.8844
Q9UNA1	4	2	ARHGAP26	Rho GTPase-activating protein 26 OS=Homo sapiens GN=ARHGAP26 PE=1 SV=1	1890.22	10.8843
P21675	71	8	TAF1	Transcription initiation factor TFIID subunit 1 OS=Homo sapiens GN=TAF1 PE=1 SV=2	1887.16	10.882
P78310	30	16	CXADR	Coxsackievirus and adenovirus receptor OS=Homo sapiens GN=CXADR PE=1 SV=1	1885.47	10.8807
Q53EL6	15	5	PDCD4	Programmed cell death protein 4 OS=Homo sapiens GN=PDCD4 PE=1 SV=2	1878.39	10.8753
Q7KZF4	123	44	SND1	Staphylococcal nuclease domain-containing protein 1 OS=Homo sapiens GN=SND1 PE=1 SV=1	1864.04	10.8642
Q96DA2	17	5	RAB39B	Ras-related protein Rab-39B OS=Homo sapiens GN=RAB39B PE=1 SV=1	1862.19	10.8628
O43237	50	8	DYNC1LI2	Cytoplasmic dynein 1 light intermediate chain 2 OS=Homo sapiens GN=DYNC1LI2 PE=1 SV=1	1854.35	10.8567
Q5VTR2	140	30	RNF20	E3 ubiquitin-protein ligase BRE1A OS=Homo sapiens GN=RNF20 PE=1 SV=2	1846.37	10.8505
Q14669	57	12	TRIP12	E3 ubiquitin-protein ligase TRIP12 OS=Homo sapiens GN=TRIP12 PE=1 SV=1	1832.68	10.8397
Q8IY81	38	11	FTSJ3	pre-rRNA processing protein FTSJ3 OS=Homo sapiens GN=FTSJ3 PE=1 SV=2	1831.81	10.8391
A0A1B0GWJ6	8	2	MYO18A	Unconventional myosin-XVIIIa (Fragment) OS=Homo sapiens GN=MYO18A PE=1 SV=1	1829.48	10.8372
Q9UPA5	36	6	BSN	Protein bassoon OS=Homo sapiens GN=BSN PE=1 SV=4	1827.51	10.8357
P23284	55	21	PPIB	Peptidyl-prolyl cis-trans isomerase B OS=Homo sapiens GN=PPIB PE=1 SV=2	1827.33	10.8355
P07196	117	41	NEFL	Neurofilament light polypeptide OS=Homo sapiens GN=NEFL PE=1 SV=3	1824.56	10.8333
P46060	60	16	RANGAP1	Ran GTPase-activating protein 1 OS=Homo sapiens GN=RANGAP1 PE=1 SV=1	1823.19	10.8322
Q05BV3	70	19	EML5	Echinoderm microtubule-associated protein-like 5 OS=Homo sapiens GN=EML5 PE=2 SV=3	1815.85	10.8264
P43243	148	23	MATR3	Matrin-3 OS=Homo sapiens GN=MATR3 PE=1 SV=2	1809.79	10.8216
Q15366	37	9	PCBP2	Poly(rC)-binding protein 2 OS=Homo sapiens GN=PCBP2 PE=1 SV=1	1804.75	10.8176
Q9Y2W1	111	34	THRAP3	Thyroid hormone receptor-associated protein 3 OS=Homo sapiens GN=THRAP3 PE=1 SV=2	1799.66	10.8135
O94906	63	16	PRPF6	Pre-mRNA-processing factor 6 OS=Homo sapiens GN=PRPF6 PE=1 SV=1	1798.93	10.8129
E9PAV3	132	40	NACA	Nascent polypeptide-associated complex subunit alpha_ muscle-specific form OS=Homo sapiens GN=NACA PE=1 SV=1	1797	10.8114
P26641	85	40	EEF1G	Elongation factor 1-gamma OS=Homo sapiens GN=EEF1G PE=1 SV=3	1792.46	10.8077
A2RUR9	112	2	CCDC144A	Coiled-coil domain-containing protein 144A OS=Homo sapiens GN=CCDC144A PE=2 SV=1	1782.56	10.7997
O43852	56	18	CALU	Calumenin OS=Homo sapiens GN=CALU PE=1 SV=2	1781.93	10.7992
P08237	86	21	PFKM	ATP-dependent 6-phosphofructokinase_ muscle type OS=Homo sapiens GN=PFKM PE=1 SV=2	1778.29	10.7963
P21333	394	66	FLNA	Filamin-A OS=Homo sapiens GN=FLNA PE=1 SV=4	1774.17	10.7929
P52292	46	18	KPNA2	Importin subunit alpha-1 OS=Homo sapiens GN=KPNA2 PE=1 SV=1	1764.08	10.7847
P11216	99	23	PYGB	Glycogen phosphorylase_ brain form OS=Homo sapiens GN=PYGB PE=1 SV=5	1763.81	10.7845
Q6ZVL6	12	5	KIAA1549L	UPF0606 protein KIAA1549L OS=Homo sapiens GN=KIAA1549L PE=2 SV=2	1762.09	10.7831
Q8NFC6	191	39	BOD1L1	Biorientation of chromosomes in cell division protein 1-like 1 OS=Homo sapiens GN=BOD1L1 PE=1 SV=2	1759.78	10.7812
Q96KP4	67	21	CNDP2	Cytosolic non-specific dipeptidase OS=Homo sapiens GN=CNDP2 PE=1 SV=2	1752.79	10.7754
A0A087WZV3	17	2	CACNA1C	Voltage-dependent L-type calcium channel subunit alpha-1C OS=Homo sapiens GN=CACNA1C PE=1 SV=1	1751.35	10.7743
P17600	70	32	SYN1	Synapsin-1 OS=Homo sapiens GN=SYN1 PE=1 SV=3	1749.03	10.7723
P51587	35	9	BRCA2	Breast cancer type 2 susceptibility protein OS=Homo sapiens GN=BRCA2 PE=1 SV=3	1745.86	10.7697
Q12923	69	13	PTPN13	Tyrosine-protein phosphatase non-receptor type 13 OS=Homo sapiens GN=PTPN13 PE=1 SV=2	1745.48	10.7694
Q9NTK5	48	2	OLA1	Obg-like ATPase 1 OS=Homo sapiens GN=OLA1 PE=1 SV=2	1736.95	10.7623
P12883	77	6	MYH7	Myosin-7 OS=Homo sapiens GN=MYH7 PE=1 SV=5	1733.36	10.7594
P46597	5	2	ASMT	Acetylserotonin O-methyltransferase OS=Homo sapiens GN=ASMT PE=1 SV=1	1731.65	10.7579
Q2WGJ9	26	9	FER1L6	Fer-1-like protein 6 OS=Homo sapiens GN=FER1L6 PE=2 SV=2	1727.9	10.7548
Q8NFD5	50	5	ARID1B	AT-rich interactive domain-containing protein 1B OS=Homo sapiens GN=ARID1B PE=1 SV=2	1723.51	10.7511
P02649	56	18	APOE	Apolipoprotein E OS=Homo sapiens GN=APOE PE=1 SV=1	1722.22	10.7501
Q96T23	115	25	RSF1	Remodeling and spacing factor 1 OS=Homo sapiens GN=RSF1 PE=1 SV=2	1715.64	10.7445
P07910	82	17	HNRNPC	Heterogeneous nuclear ribonucleoproteins C1/C2 OS=Homo sapiens GN=HNRNPC PE=1 SV=4	1706.26	10.7366
Q969G3	38	5	SMARCE1	SWI/SNF-related matrix-associated actin-dependent regulator of chromatin subfamily E member 1 OS=Homo sapiens GN=SMARCE1 PE=1 SV=2	1704.33	10.735
Q92598	143	27	HSPH1	Heat shock protein 105 kDa OS=Homo sapiens GN=HSPH1 PE=1 SV=1	1700.63	10.7319
O15066	70	10	KIF3B	Kinesin-like protein KIF3B OS=Homo sapiens GN=KIF3B PE=1 SV=1	1699.79	10.7311
P51826	28	6	AFF3	AF4/FMR2 family member 3 OS=Homo sapiens GN=AFF3 PE=1 SV=2	1698.46	10.73
Q96QP1	9	2	ALPK1	Alpha-protein kinase 1 OS=Homo sapiens GN=ALPK1 PE=2 SV=3	1691.4	10.724
Q5XPI4	21	2	RNF123	E3 ubiquitin-protein ligase RNF123 OS=Homo sapiens GN=RNF123 PE=1 SV=1	1683.82	10.7175
P15121	33	8	AKR1B1	Aldose reductase OS=Homo sapiens GN=AKR1B1 PE=1 SV=3	1679.07	10.7134
Q9HDC9	50	9	APMAP	Adipocyte plasma membrane-associated protein OS=Homo sapiens GN=APMAP PE=1 SV=2	1676.8	10.7115
Q9UBC2	92	11	EPS15L1	Epidermal growth factor receptor substrate 15-like 1 OS=Homo sapiens GN=EPS15L1 PE=1 SV=1	1667.63	10.7036
Q9NQC3	117	49	RTN4	Reticulon-4 OS=Homo sapiens GN=RTN4 PE=1 SV=2	1665.02	10.7013
Q07960	31	8	ARHGAP1	Rho GTPase-activating protein 1 OS=Homo sapiens GN=ARHGAP1 PE=1 SV=1	1664.93	10.7012
P62826	53	7	RAN	GTP-binding nuclear protein Ran OS=Homo sapiens GN=RAN PE=1 SV=3	1657.63	10.6949
A7KAX9	29	4	ARHGAP32	Rho GTPase-activating protein 32 OS=Homo sapiens GN=ARHGAP32 PE=1 SV=1	1656.25	10.6937
P46821	435	171	MAP1B	Microtubule-associated protein 1B OS=Homo sapiens GN=MAP1B PE=1 SV=2	1649.74	10.688
Q6KB66	31	7	KRT80	Keratin_ type II cytoskeletal 80 OS=Homo sapiens GN=KRT80 PE=1 SV=2	1648.98	10.6874
Q96PK6	60	18	RBM14	RNA-binding protein 14 OS=Homo sapiens GN=RBM14 PE=1 SV=2	1641.23	10.6806
Q9Y4B5	134	25	MTCL1	Microtubule cross-linking factor 1 OS=Homo sapiens GN=MTCL1 PE=1 SV=5	1641.22	10.6806
O75592	117	23	MYCBP2	E3 ubiquitin-protein ligase MYCBP2 OS=Homo sapiens GN=MYCBP2 PE=1 SV=3	1633.59	10.6738
P62879	40	9	GNB2	Guanine nucleotide-binding protein G(I)/G(S)/G(T) subunit beta-2 OS=Homo sapiens GN=GNB2 PE=1 SV=3	1629.83	10.6705
Q14008	234	63	CKAP5	Cytoskeleton-associated protein 5 OS=Homo sapiens GN=CKAP5 PE=1 SV=3	1625.51	10.6667
P17677	51	18	GAP43	Neuromodulin OS=Homo sapiens GN=GAP43 PE=1 SV=1	1625.24	10.6664
Q8WXX0	128	24	DNAH7	Dynein heavy chain 7_ axonemal OS=Homo sapiens GN=DNAH7 PE=1 SV=2	1623.16	10.6646
Q9NX63	26	3	CHCHD3	MICOS complex subunit MIC19 OS=Homo sapiens GN=CHCHD3 PE=1 SV=1	1618.02	10.66
Q13561	74	12	DCTN2	Dynactin subunit 2 OS=Homo sapiens GN=DCTN2 PE=1 SV=4	1610.43	10.6532
Q14966	105	10	ZNF638	Zinc finger protein 638 OS=Homo sapiens GN=ZNF638 PE=1 SV=2	1606.26	10.6495
P61158	38	9	ACTR3	Actin-related protein 3 OS=Homo sapiens GN=ACTR3 PE=1 SV=3	1605.52	10.6488
Q9Y2G3	28	3	ATP11B	Probable phospholipid-transporting ATPase IF OS=Homo sapiens GN=ATP11B PE=1 SV=2	1603.71	10.6472
Q6P2Q9	223	51	PRPF8	Pre-mRNA-processing-splicing factor 8 OS=Homo sapiens GN=PRPF8 PE=1 SV=2	1603.71	10.6472
P40926	68	21	MDH2	Malate dehydrogenase_ mitochondrial OS=Homo sapiens GN=MDH2 PE=1 SV=3	1602.14	10.6458
Q9Y2H9	25	4	MAST1	Microtubule-associated serine/threonine-protein kinase 1 OS=Homo sapiens GN=MAST1 PE=1 SV=2	1600.01	10.6439
Q9NR99	14	2	MXRA5	Matrix-remodeling-associated protein 5 OS=Homo sapiens GN=MXRA5 PE=1 SV=3	1580.49	10.6262
Q86V48	115	21	LUZP1	Leucine zipper protein 1 OS=Homo sapiens GN=LUZP1 PE=1 SV=2	1578.18	10.624
Q5JSZ5	145	35	PRRC2B	Protein PRRC2B OS=Homo sapiens GN=PRRC2B PE=1 SV=2	1574.25	10.6204
P12268	74	13	IMPDH2	Inosine-5'-monophosphate dehydrogenase 2 OS=Homo sapiens GN=IMPDH2 PE=1 SV=2	1573.2	10.6195
Q13748	56	11	TUBA3C	Tubulin alpha-3C/D chain OS=Homo sapiens GN=TUBA3C PE=1 SV=3	1566.4	10.6132
Q96AE4	117	20	FUBP1	Far upstream element-binding protein 1 OS=Homo sapiens GN=FUBP1 PE=1 SV=3	1562.71	10.6098
Q9UHB9	34	8	SRP68	Signal recognition particle subunit SRP68 OS=Homo sapiens GN=SRP68 PE=1 SV=2	1561.79	10.609
P36957	57	17	DLST	Dihydrolipoyllysine-residue succinyltransferase component of 2-oxoglutarate dehydrogenase complex_ mitochondrial OS=Homo sapiens GN=DLST PE=1 SV=4	1560.14	10.6075
P18669	49	16	PGAM1	Phosphoglycerate mutase 1 OS=Homo sapiens GN=PGAM1 PE=1 SV=2	1557.15	10.6047
P32004	76	29	L1CAM	Neural cell adhesion molecule L1 OS=Homo sapiens GN=L1CAM PE=1 SV=2	1556.81	10.6044
Q9HAQ2	25	3	KIF9	Kinesin-like protein KIF9 OS=Homo sapiens GN=KIF9 PE=1 SV=4	1556.01	10.6036
Q7Z7A1	371	77	CNTRL	Centriolin OS=Homo sapiens GN=CNTRL PE=1 SV=2	1554.31	10.6021
P12532	43	12	CKMT1A	Creatine kinase U-type_ mitochondrial OS=Homo sapiens GN=CKMT1A PE=1 SV=1	1544.09	10.5925
P18583	102	16	SON	Protein SON OS=Homo sapiens GN=SON PE=1 SV=4	1541.29	10.5899
Q6UB99	126	25	ANKRD11	Ankyrin repeat domain-containing protein 11 OS=Homo sapiens GN=ANKRD11 PE=1 SV=3	1535.48	10.5845
Q14566	118	49	MCM6	DNA replication licensing factor MCM6 OS=Homo sapiens GN=MCM6 PE=1 SV=1	1529.22	10.5786
Q01813	80	11	PFKP	ATP-dependent 6-phosphofructokinase_ platelet type OS=Homo sapiens GN=PFKP PE=1 SV=2	1526.21	10.5757
P00338	100	38	LDHA	L-lactate dehydrogenase A chain OS=Homo sapiens GN=LDHA PE=1 SV=2	1524.32	10.574
Q9NVP1	25	7	DDX18	ATP-dependent RNA helicase DDX18 OS=Homo sapiens GN=DDX18 PE=1 SV=2	1523.95	10.5736
P11217	56	11	PYGM	Glycogen phosphorylase_ muscle form OS=Homo sapiens GN=PYGM PE=1 SV=6	1522.15	10.5719
Q5MIZ7	17	2	PPP4R3B	Serine/threonine-protein phosphatase 4 regulatory subunit 3B OS=Homo sapiens GN=PPP4R3B PE=1 SV=2	1518.92	10.5688
Q9BX26	51	5	SYCP2	Synaptonemal complex protein 2 OS=Homo sapiens GN=SYCP2 PE=2 SV=2	1514.98	10.5651
O60264	79	15	SMARCA5	SWI/SNF-related matrix-associated actin-dependent regulator of chromatin subfamily A member 5 OS=Homo sapiens GN=SMARCA5 PE=1 SV=1	1513.41	10.5636
P49736	125	19	MCM2	DNA replication licensing factor MCM2 OS=Homo sapiens GN=MCM2 PE=1 SV=4	1502.12	10.5528
Q9UHB7	58	11	AFF4	AF4/FMR2 family member 4 OS=Homo sapiens GN=AFF4 PE=1 SV=1	1499.96	10.5507
O94915	66	16	FRYL	Protein furry homolog-like OS=Homo sapiens GN=FRYL PE=1 SV=2	1498.56	10.5494
P42285	67	21	SKIV2L2	Superkiller viralicidic activity 2-like 2 OS=Homo sapiens GN=SKIV2L2 PE=1 SV=3	1498.19	10.549
Q96Q15	216	20	SMG1	Serine/threonine-protein kinase SMG1 OS=Homo sapiens GN=SMG1 PE=1 SV=3	1497.39	10.5482
P05783	112	25	KRT18	Keratin_ type I cytoskeletal 18 OS=Homo sapiens GN=KRT18 PE=1 SV=2	1494.7	10.5456
Q96JG6	23	3	VPS50	Syndetin OS=Homo sapiens GN=VPS50 PE=1 SV=3	1493.07	10.5441
Q6IE81	10	3	JADE1	Protein Jade-1 OS=Homo sapiens GN=JADE1 PE=1 SV=1	1489.23	10.5403
E7EV07	24	4	ARHGEF4	Rho guanine nucleotide exchange factor 4 OS=Homo sapiens GN=ARHGEF4 PE=1 SV=2	1488.21	10.5394
Q99798	98	11	ACO2	Aconitate hydratase_ mitochondrial OS=Homo sapiens GN=ACO2 PE=1 SV=2	1486.32	10.5375
Q8IXB1	27	4	DNAJC10	DnaJ homolog subfamily C member 10 OS=Homo sapiens GN=DNAJC10 PE=1 SV=2	1485.1	10.5363
P17844	104	14	DDX5	Probable ATP-dependent RNA helicase DDX5 OS=Homo sapiens GN=DDX5 PE=1 SV=1	1475.85	10.5273
Q4G0P3	261	55	HYDIN	Hydrocephalus-inducing protein homolog OS=Homo sapiens GN=HYDIN PE=1 SV=3	1473.58	10.5251
P55795	47	7	HNRNPH2	Heterogeneous nuclear ribonucleoprotein H2 OS=Homo sapiens GN=HNRNPH2 PE=1 SV=1	1471.13	10.5227
Q9UM54	139	9	MYO6	Unconventional myosin-VI OS=Homo sapiens GN=MYO6 PE=1 SV=4	1469.75	10.5214
P18206	258	107	VCL	Vinculin OS=Homo sapiens GN=VCL PE=1 SV=4	1468.8	10.5204
P60201	27	18	PLP1	Myelin proteolipid protein OS=Homo sapiens GN=PLP1 PE=1 SV=2	1460.97	10.5127
Q13509	89	20	TUBB3	Tubulin beta-3 chain OS=Homo sapiens GN=TUBB3 PE=1 SV=2	1458.91	10.5107
Q9C0H9	39	2	SRCIN1	SRC kinase signaling inhibitor 1 OS=Homo sapiens GN=SRCIN1 PE=1 SV=3	1455.55	10.5074
Q02878	42	15	RPL6	60S ribosomal protein L6 OS=Homo sapiens GN=RPL6 PE=1 SV=3	1455.28	10.5071
P18621	16	2	RPL17	60S ribosomal protein L17 OS=Homo sapiens GN=RPL17 PE=1 SV=3	1454.88	10.5067
Q9NVK5	5	2	FGFR1OP2	FGFR1 oncogene partner 2 OS=Homo sapiens GN=FGFR1OP2 PE=1 SV=1	1451.07	10.5029
P46109	32	16	CRKL	Crk-like protein OS=Homo sapiens GN=CRKL PE=1 SV=1	1448.99	10.5008
Q6PKG0	104	15	LARP1	La-related protein 1 OS=Homo sapiens GN=LARP1 PE=1 SV=2	1448.3	10.5001
P55287	10	2	CDH11	Cadherin-11 OS=Homo sapiens GN=CDH11 PE=2 SV=2	1447.87	10.4997
Q12860	113	51	CNTN1	Contactin-1 OS=Homo sapiens GN=CNTN1 PE=1 SV=1	1445.31	10.4972
Q8N3C0	57	9	ASCC3	Activating signal cointegrator 1 complex subunit 3 OS=Homo sapiens GN=ASCC3 PE=1 SV=3	1444.66	10.4965
P43304	77	17	GPD2	Glycerol-3-phosphate dehydrogenase_ mitochondrial OS=Homo sapiens GN=GPD2 PE=1 SV=3	1443.71	10.4956
Q15029	105	35	EFTUD2	116 kDa U5 small nuclear ribonucleoprotein component OS=Homo sapiens GN=EFTUD2 PE=1 SV=1	1442.56	10.4944
O00232	66	24	PSMD12	26S proteasome non-ATPase regulatory subunit 12 OS=Homo sapiens GN=PSMD12 PE=1 SV=3	1441.47	10.4933
P49454	370	93	CENPF	Centromere protein F OS=Homo sapiens GN=CENPF PE=1 SV=2	1433.3	10.4851
Q86UP2	226	36	KTN1	Kinectin OS=Homo sapiens GN=KTN1 PE=1 SV=1	1432.18	10.484
P49368	128	27	CCT3	T-complex protein 1 subunit gamma OS=Homo sapiens GN=CCT3 PE=1 SV=4	1429.38	10.4812
P32119	53	18	PRDX2	Peroxiredoxin-2 OS=Homo sapiens GN=PRDX2 PE=1 SV=5	1427.86	10.4796
Q92608	96	16	DOCK2	Dedicator of cytokinesis protein 2 OS=Homo sapiens GN=DOCK2 PE=1 SV=2	1425.79	10.4775
Q8N3K9	69	13	CMYA5	Cardiomyopathy-associated protein 5 OS=Homo sapiens GN=CMYA5 PE=1 SV=3	1424.12	10.4759
P54577	116	28	YARS	Tyrosine--tRNA ligase_ cytoplasmic OS=Homo sapiens GN=YARS PE=1 SV=4	1420.55	10.4722
Q00839	161	26	HNRNPU	Heterogeneous nuclear ribonucleoprotein U OS=Homo sapiens GN=HNRNPU PE=1 SV=6	1420.17	10.4719
O60229	172	9	KALRN	Kalirin OS=Homo sapiens GN=KALRN PE=1 SV=2	1418.41	10.4701
Q99459	49	16	CDC5L	Cell division cycle 5-like protein OS=Homo sapiens GN=CDC5L PE=1 SV=2	1415.89	10.4675
P04792	46	22	HSPB1	Heat shock protein beta-1 OS=Homo sapiens GN=HSPB1 PE=1 SV=2	1414.27	10.4658
Q07955	60	16	SRSF1	Serine/arginine-rich splicing factor 1 OS=Homo sapiens GN=SRSF1 PE=1 SV=2	1410.02	10.4615
Q9H267	18	2	VPS33B	Vacuolar protein sorting-associated protein 33B OS=Homo sapiens GN=VPS33B PE=1 SV=2	1407.86	10.4593
P11488	30	6	GNAT1	Guanine nucleotide-binding protein G(t) subunit alpha-1 OS=Homo sapiens GN=GNAT1 PE=1 SV=5	1404.23	10.4556
Q15772	130	31	SPEG	Striated muscle preferentially expressed protein kinase OS=Homo sapiens GN=SPEG PE=1 SV=4	1401.98	10.4533
P54136	75	28	RARS	Arginine--tRNA ligase_ cytoplasmic OS=Homo sapiens GN=RARS PE=1 SV=2	1399.01	10.4502
P30048	27	16	PRDX3	Thioredoxin-dependent peroxide reductase_ mitochondrial OS=Homo sapiens GN=PRDX3 PE=1 SV=3	1396.89	10.448
P49591	94	18	SARS	Serine--tRNA ligase_ cytoplasmic OS=Homo sapiens GN=SARS PE=1 SV=3	1396.42	10.4475
Q6Q0C0	14	3	TRAF7	E3 ubiquitin-protein ligase TRAF7 OS=Homo sapiens GN=TRAF7 PE=1 SV=1	1393.35	10.4443
Q9BXL7	46	5	CARD11	Caspase recruitment domain-containing protein 11 OS=Homo sapiens GN=CARD11 PE=1 SV=3	1391.32	10.4422
A6PVS8	16	3	LRRIQ3	Leucine-rich repeat and IQ domain-containing protein 3 OS=Homo sapiens GN=LRRIQ3 PE=1 SV=1	1384.78	10.4354
Q14146	37	8	URB2	Unhealthy ribosome biogenesis protein 2 homolog OS=Homo sapiens GN=URB2 PE=2 SV=2	1384.29	10.4349
Q92945	109	17	KHSRP	Far upstream element-binding protein 2 OS=Homo sapiens GN=KHSRP PE=1 SV=4	1382.79	10.4334
O95696	7	2	BRD1	Bromodomain-containing protein 1 OS=Homo sapiens GN=BRD1 PE=1 SV=1	1380.73	10.4312
Q02224	458	12	CENPE	Centromere-associated protein E OS=Homo sapiens GN=CENPE PE=1 SV=2	1378.55	10.4289
A0MZ66	67	21	SHTN1	Shootin-1 OS=Homo sapiens GN=SHTN1 PE=1 SV=4	1376.41	10.4267
Q8IWY7	40	4	TTBK2	Tau-tubulin kinase OS=Homo sapiens GN=TTBK2 PE=1 SV=1	1375.32	10.4256
Q01844	48	6	EWSR1	RNA-binding protein EWS OS=Homo sapiens GN=EWSR1 PE=1 SV=1	1374.18	10.4244
Q99880	34	14	HIST1H2BL	Histone H2B type 1-L OS=Homo sapiens GN=HIST1H2BL PE=1 SV=3	1371.18	10.4212
Q58FF7	68	5	HSP90AB3P	Putative heat shock protein HSP 90-beta-3 OS=Homo sapiens GN=HSP90AB3P PE=5 SV=1	1369.27	10.4192
P14550	55	17	AKR1A1	Alcohol dehydrogenase [NADP(+)] OS=Homo sapiens GN=AKR1A1 PE=1 SV=3	1365.04	10.4147
Q7LBC6	66	13	KDM3B	Lysine-specific demethylase 3B OS=Homo sapiens GN=KDM3B PE=1 SV=2	1361.44	10.4109
A6QL64	159	10	ANKRD36	Ankyrin repeat domain-containing protein 36A OS=Homo sapiens GN=ANKRD36 PE=2 SV=3	1360.68	10.4101
P30044	18	12	PRDX5	Peroxiredoxin-5_ mitochondrial OS=Homo sapiens GN=PRDX5 PE=1 SV=4	1351.29	10.4001
Q9UQ80	83	24	PA2G4	Proliferation-associated protein 2G4 OS=Homo sapiens GN=PA2G4 PE=1 SV=3	1349.92	10.3987
Q9Y3F4	46	21	STRAP	Serine-threonine kinase receptor-associated protein OS=Homo sapiens GN=STRAP PE=1 SV=1	1343.8	10.3921
Q03164	181	25	KMT2A	Histone-lysine N-methyltransferase 2A OS=Homo sapiens GN=KMT2A PE=1 SV=5	1342.09	10.3903
Q9Y5B9	128	48	SUPT16H	FACT complex subunit SPT16 OS=Homo sapiens GN=SUPT16H PE=1 SV=1	1339.1	10.387
Q15021	42	10	NCAPD2	Condensin complex subunit 1 OS=Homo sapiens GN=NCAPD2 PE=1 SV=3	1339.05	10.387
P20618	35	13	PSMB1	Proteasome subunit beta type-1 OS=Homo sapiens GN=PSMB1 PE=1 SV=2	1338.13	10.386
Q12874	86	34	SF3A3	Splicing factor 3A subunit 3 OS=Homo sapiens GN=SF3A3 PE=1 SV=1	1337.59	10.3854
O14917	32	6	PCDH17	Protocadherin-17 OS=Homo sapiens GN=PCDH17 PE=2 SV=2	1332.13	10.3795
P52907	45	19	CAPZA1	F-actin-capping protein subunit alpha-1 OS=Homo sapiens GN=CAPZA1 PE=1 SV=3	1331.32	10.3786
Q96M86	125	27	DNHD1	Dynein heavy chain domain-containing protein 1 OS=Homo sapiens GN=DNHD1 PE=2 SV=2	1324.15	10.3709
O15381	26	7	NVL	Nuclear valosin-containing protein-like OS=Homo sapiens GN=NVL PE=1 SV=1	1322.4	10.3689
A8K7Q2	65	3	HSPA8	Heat shock cognate 71 kDa protein OS=Homo sapiens GN=HSPA8 PE=1 SV=1	1320.99	10.3674
Q9BZ29	161	13	DOCK9	Dedicator of cytokinesis protein 9 OS=Homo sapiens GN=DOCK9 PE=1 SV=2	1320.32	10.3667
Q9UN86	50	17	G3BP2	Ras GTPase-activating protein-binding protein 2 OS=Homo sapiens GN=G3BP2 PE=1 SV=2	1318.98	10.3652
Q02978	19	4	SLC25A11	Mitochondrial 2-oxoglutarate/malate carrier protein OS=Homo sapiens GN=SLC25A11 PE=1 SV=3	1312.62	10.3582
Q9UBU9	23	3	NXF1	Nuclear RNA export factor 1 OS=Homo sapiens GN=NXF1 PE=1 SV=1	1308.06	10.3532
O14980	113	44	XPO1	Exportin-1 OS=Homo sapiens GN=XPO1 PE=1 SV=1	1304.75	10.3496
P54727	48	21	RAD23B	UV excision repair protein RAD23 homolog B OS=Homo sapiens GN=RAD23B PE=1 SV=1	1303.14	10.3478
Q9P2D7	250	59	DNAH1	Dynein heavy chain 1_ axonemal OS=Homo sapiens GN=DNAH1 PE=2 SV=4	1299.95	10.3442
Q96GC6	15	2	ZNF274	Neurotrophin receptor-interacting factor homolog OS=Homo sapiens GN=ZNF274 PE=1 SV=2	1296.72	10.3407
P06744	109	14	GPI	Glucose-6-phosphate isomerase OS=Homo sapiens GN=GPI PE=1 SV=4	1296.05	10.3399
Q07283	95	12	TCHH	Trichohyalin OS=Homo sapiens GN=TCHH PE=1 SV=2	1293.95	10.3376
Q13907	15	6	IDI1	Isopentenyl-diphosphate Delta-isomerase 1 OS=Homo sapiens GN=IDI1 PE=1 SV=2	1292.53	10.336
Q5SQI0	25	12	ATAT1	Alpha-tubulin N-acetyltransferase 1 OS=Homo sapiens GN=ATAT1 PE=1 SV=1	1289.89	10.333
Q03701	17	6	CEBPZ	CCAAT/enhancer-binding protein zeta OS=Homo sapiens GN=CEBPZ PE=1 SV=3	1288.19	10.3311
P25391	56	18	LAMA1	Laminin subunit alpha-1 OS=Homo sapiens GN=LAMA1 PE=1 SV=2	1284.72	10.3272
Q4AC94	88	17	C2CD3	C2 domain-containing protein 3 OS=Homo sapiens GN=C2CD3 PE=1 SV=4	1283.54	10.3259
Q9NZN3	46	11	EHD3	EH domain-containing protein 3 OS=Homo sapiens GN=EHD3 PE=1 SV=2	1283.28	10.3256
Q9H361	104	27	PABPC3	Polyadenylate-binding protein 3 OS=Homo sapiens GN=PABPC3 PE=1 SV=2	1282.79	10.3251
P49802	16	3	RGS7	Regulator of G-protein signaling 7 OS=Homo sapiens GN=RGS7 PE=1 SV=3	1278.14	10.3198
P37837	74	16	TALDO1	Transaldolase OS=Homo sapiens GN=TALDO1 PE=1 SV=2	1276.24	10.3177
P46940	195	13	IQGAP1	Ras GTPase-activating-like protein IQGAP1 OS=Homo sapiens GN=IQGAP1 PE=1 SV=1	1276.01	10.3174
O75131	32	5	CPNE3	Copine-3 OS=Homo sapiens GN=CPNE3 PE=1 SV=1	1275.37	10.3167
P78356	27	6	PIP4K2B	Phosphatidylinositol 5-phosphate 4-kinase type-2 beta OS=Homo sapiens GN=PIP4K2B PE=1 SV=1	1275	10.3163
Q9H6T3	31	5	RPAP3	RNA polymerase II-associated protein 3 OS=Homo sapiens GN=RPAP3 PE=1 SV=2	1272.31	10.3132
Q13813	689	108	SPTAN1	Spectrin alpha chain_ non-erythrocytic 1 OS=Homo sapiens GN=SPTAN1 PE=1 SV=3	1265.4	10.3054
Q9C093	83	3	SPEF2	Sperm flagellar protein 2 OS=Homo sapiens GN=SPEF2 PE=2 SV=2	1264.2	10.304
P02787	57	8	TF	Serotransferrin OS=Homo sapiens GN=TF PE=1 SV=3	1259.58	10.2987
P57740	58	17	NUP107	Nuclear pore complex protein Nup107 OS=Homo sapiens GN=NUP107 PE=1 SV=1	1251.28	10.2892
O75746	53	20	SLC25A12	Calcium-binding mitochondrial carrier protein Aralar1 OS=Homo sapiens GN=SLC25A12 PE=1 SV=2	1250.69	10.2885
Q96JQ2	31	5	CLMN	Calmin OS=Homo sapiens GN=CLMN PE=1 SV=1	1249.71	10.2874
Q9Y4G8	77	17	RAPGEF2	Rap guanine nucleotide exchange factor 2 OS=Homo sapiens GN=RAPGEF2 PE=1 SV=1	1247.43	10.2847
O95714	236	48	HERC2	E3 ubiquitin-protein ligase HERC2 OS=Homo sapiens GN=HERC2 PE=1 SV=2	1239.4	10.2754
Q6ZU35	44	2	KIAA1211	Uncharacterized protein KIAA1211 OS=Homo sapiens GN=KIAA1211 PE=1 SV=3	1238.94	10.2749
P21399	66	32	ACO1	Cytoplasmic aconitate hydratase OS=Homo sapiens GN=ACO1 PE=1 SV=3	1237.87	10.2736
P41252	146	13	IARS	Isoleucine--tRNA ligase_ cytoplasmic OS=Homo sapiens GN=IARS PE=1 SV=2	1235.34	10.2707
Q3B7T1	27	4	EDRF1	Erythroid differentiation-related factor 1 OS=Homo sapiens GN=EDRF1 PE=1 SV=1	1234.56	10.2698
Q14320	24	2	FAM50A	Protein FAM50A OS=Homo sapiens GN=FAM50A PE=1 SV=2	1233.61	10.2687
P11047	98	21	LAMC1	Laminin subunit gamma-1 OS=Homo sapiens GN=LAMC1 PE=1 SV=3	1231.9	10.2667
O00299	23	11	CLIC1	Chloride intracellular channel protein 1 OS=Homo sapiens GN=CLIC1 PE=1 SV=4	1231.55	10.2663
Q96SQ9	27	13	CYP2S1	Cytochrome P450 2S1 OS=Homo sapiens GN=CYP2S1 PE=1 SV=2	1224.42	10.2579
Q06830	83	36	PRDX1	Peroxiredoxin-1 OS=Homo sapiens GN=PRDX1 PE=1 SV=1	1218.89	10.2514
Q9Y4A5	176	6	TRRAP	Transformation/transcription domain-associated protein OS=Homo sapiens GN=TRRAP PE=1 SV=3	1217.07	10.2492
Q9H1E3	18	9	NUCKS1	Nuclear ubiquitous casein and cyclin-dependent kinase substrate 1 OS=Homo sapiens GN=NUCKS1 PE=1 SV=1	1215.55	10.2474
Q8N9W4	50	5	GOLGA6L2	Golgin subfamily A member 6-like protein 2 OS=Homo sapiens GN=GOLGA6L2 PE=1 SV=2	1210.92	10.2419
Q9H6S3	23	2	EPS8L2	Epidermal growth factor receptor kinase substrate 8-like protein 2 OS=Homo sapiens GN=EPS8L2 PE=1 SV=2	1210.92	10.2419
Q562R1	43	15	ACTBL2	Beta-actin-like protein 2 OS=Homo sapiens GN=ACTBL2 PE=1 SV=2	1210	10.2408
O60828	11	2	PQBP1	Polyglutamine-binding protein 1 OS=Homo sapiens GN=PQBP1 PE=1 SV=1	1209.69	10.2404
P05787	237	93	KRT8	Keratin_ type II cytoskeletal 8 OS=Homo sapiens GN=KRT8 PE=1 SV=7	1208.33	10.2388
Q9UHD8	105	27	SEPT9	Septin-9 OS=Homo sapiens GN=SEPT9 PE=1 SV=2	1203.81	10.2334
Q9C0C9	33	7	UBE2O	(E3-independent) E2 ubiquitin-conjugating enzyme OS=Homo sapiens GN=UBE2O PE=1 SV=3	1201.58	10.2307
O75969	29	4	AKAP3	A-kinase anchor protein 3 OS=Homo sapiens GN=AKAP3 PE=1 SV=2	1201.36	10.2305
Q13263	152	52	TRIM28	Transcription intermediary factor 1-beta OS=Homo sapiens GN=TRIM28 PE=1 SV=5	1195.11	10.2229
P12956	151	38	XRCC6	X-ray repair cross-complementing protein 6 OS=Homo sapiens GN=XRCC6 PE=1 SV=2	1191.94	10.2191
Q13535	144	23	ATR	Serine/threonine-protein kinase ATR OS=Homo sapiens GN=ATR PE=1 SV=3	1185.16	10.2109
U3KPU4	12	2	GCC2	GRIP and coiled-coil domain-containing protein 2 (Fragment) OS=Homo sapiens GN=GCC2 PE=1 SV=1	1184.4	10.2099
P27797	71	33	CALR	Calreticulin OS=Homo sapiens GN=CALR PE=1 SV=1	1181.67	10.2066
Q04637	176	18	EIF4G1	Eukaryotic translation initiation factor 4 gamma 1 OS=Homo sapiens GN=EIF4G1 PE=1 SV=4	1180.34	10.205
Q9NZJ4	251	41	SACS	Sacsin OS=Homo sapiens GN=SACS PE=1 SV=2	1178.58	10.2028
Q9Y266	76	29	NUDC	Nuclear migration protein nudC OS=Homo sapiens GN=NUDC PE=1 SV=1	1178.03	10.2022
Q86WI3	28	3	NLRC5	Protein NLRC5 OS=Homo sapiens GN=NLRC5 PE=1 SV=3	1176.52	10.2003
P53004	31	9	BLVRA	Biliverdin reductase A OS=Homo sapiens GN=BLVRA PE=1 SV=2	1175.18	10.1987
P34897	87	20	SHMT2	Serine hydroxymethyltransferase_ mitochondrial OS=Homo sapiens GN=SHMT2 PE=1 SV=3	1171.93	10.1947
Q01581	75	29	HMGCS1	Hydroxymethylglutaryl-CoA synthase_ cytoplasmic OS=Homo sapiens GN=HMGCS1 PE=1 SV=2	1166.97	10.1885
O15031	94	20	PLXNB2	Plexin-B2 OS=Homo sapiens GN=PLXNB2 PE=1 SV=3	1164.51	10.1855
K7EK43	17	6	TUBB6	Tubulin beta-6 chain (Fragment) OS=Homo sapiens GN=TUBB6 PE=1 SV=1	1161.86	10.1822
Q32P51	108	33	HNRNPA1L2	Heterogeneous nuclear ribonucleoprotein A1-like 2 OS=Homo sapiens GN=HNRNPA1L2 PE=2 SV=2	1158.93	10.1786
O15018	35	9	PDZD2	PDZ domain-containing protein 2 OS=Homo sapiens GN=PDZD2 PE=1 SV=4	1158.74	10.1783
Q08043	134	12	ACTN3	Alpha-actinin-3 OS=Homo sapiens GN=ACTN3 PE=1 SV=2	1155.44	10.1742
Q06210	64	18	GFPT1	Glutamine--fructose-6-phosphate aminotransferase [isomerizing] 1 OS=Homo sapiens GN=GFPT1 PE=1 SV=3	1153.98	10.1724
Q8N163	102	14	CCAR2	Cell cycle and apoptosis regulator protein 2 OS=Homo sapiens GN=CCAR2 PE=1 SV=2	1153.46	10.1718
Q9NZM1	36	3	MYOF	Myoferlin OS=Homo sapiens GN=MYOF PE=1 SV=1	1153.35	10.1716
Q99623	79	19	PHB2	Prohibitin-2 OS=Homo sapiens GN=PHB2 PE=1 SV=2	1151.81	10.1697
Q5TCS8	67	19	AK9	Adenylate kinase 9 OS=Homo sapiens GN=AK9 PE=1 SV=2	1148.99	10.1662
Q99460	114	9	PSMD1	26S proteasome non-ATPase regulatory subunit 1 OS=Homo sapiens GN=PSMD1 PE=1 SV=2	1148.23	10.1652
P35606	102	22	COPB2	Coatomer subunit beta' OS=Homo sapiens GN=COPB2 PE=1 SV=2	1146.08	10.1625
Q9C0D0	18	3	PHACTR1	Phosphatase and actin regulator 1 OS=Homo sapiens GN=PHACTR1 PE=1 SV=3	1142.99	10.1586
P09622	52	4	DLD	Dihydrolipoyl dehydrogenase_ mitochondrial OS=Homo sapiens GN=DLD PE=1 SV=2	1139.93	10.1547
O95292	17	4	VAPB	Vesicle-associated membrane protein-associated protein B/C OS=Homo sapiens GN=VAPB PE=1 SV=3	1138.95	10.1535
B1AJZ9	154	24	FHAD1	Forkhead-associated domain-containing protein 1 OS=Homo sapiens GN=FHAD1 PE=2 SV=2	1128.79	10.1406
Q9UH77	17	3	KLHL3	Kelch-like protein 3 OS=Homo sapiens GN=KLHL3 PE=1 SV=2	1124.16	10.1346
Q9ULG6	30	6	CCPG1	Cell cycle progression protein 1 OS=Homo sapiens GN=CCPG1 PE=1 SV=3	1117	10.1254
Q709C8	189	39	VPS13C	Vacuolar protein sorting-associated protein 13C OS=Homo sapiens GN=VPS13C PE=1 SV=1	1116.61	10.1249
P15586	34	3	GNS	N-acetylglucosamine-6-sulfatase OS=Homo sapiens GN=GNS PE=1 SV=3	1116.54	10.1248
Q9Y490	199	65	TLN1	Talin-1 OS=Homo sapiens GN=TLN1 PE=1 SV=3	1112.92	10.1201
P81605	5	5	DCD	Dermcidin OS=Homo sapiens GN=DCD PE=1 SV=2	1111.87	10.1188
P05455	96	30	SSB	Lupus La protein OS=Homo sapiens GN=SSB PE=1 SV=2	1111.79	10.1187
Q8NDH2	39	4	CCDC168	Coiled-coil domain-containing protein 168 OS=Homo sapiens GN=CCDC168 PE=2 SV=2	1111.69	10.1185
Q9UQ16	110	17	DNM3	Dynamin-3 OS=Homo sapiens GN=DNM3 PE=1 SV=4	1109.47	10.1157
Q9H3P7	22	7	ACBD3	Golgi resident protein GCP60 OS=Homo sapiens GN=ACBD3 PE=1 SV=4	1108.84	10.1148
P60880	45	8	SNAP25	Synaptosomal-associated protein 25 OS=Homo sapiens GN=SNAP25 PE=1 SV=1	1108.66	10.1146
O75487	30	10	GPC4	Glypican-4 OS=Homo sapiens GN=GPC4 PE=1 SV=4	1107.63	10.1133
Q16891	123	12	IMMT	MICOS complex subunit MIC60 OS=Homo sapiens GN=IMMT PE=1 SV=1	1107.56	10.1132
Q15691	44	16	MAPRE1	Microtubule-associated protein RP/EB family member 1 OS=Homo sapiens GN=MAPRE1 PE=1 SV=3	1097.77	10.1004
Q96SN8	133	9	CDK5RAP2	CDK5 regulatory subunit-associated protein 2 OS=Homo sapiens GN=CDK5RAP2 PE=1 SV=5	1095.04	10.0968
P14866	98	26	HNRNPL	Heterogeneous nuclear ribonucleoprotein L OS=Homo sapiens GN=HNRNPL PE=1 SV=2	1094.46	10.096
Q9HB71	36	13	CACYBP	Calcyclin-binding protein OS=Homo sapiens GN=CACYBP PE=1 SV=2	1089.07	10.0889
P05388	45	6	RPLP0	60S acidic ribosomal protein P0 OS=Homo sapiens GN=RPLP0 PE=1 SV=1	1088.76	10.0885
O75915	16	4	ARL6IP5	PRA1 family protein 3 OS=Homo sapiens GN=ARL6IP5 PE=1 SV=1	1087.72	10.0871
P19784	15	4	CSNK2A2	Casein kinase II subunit alpha' OS=Homo sapiens GN=CSNK2A2 PE=1 SV=1	1084.32	10.0826
O95613	242	42	PCNT	Pericentrin OS=Homo sapiens GN=PCNT PE=1 SV=4	1082.43	10.0801
Q9UN79	8	2	SOX13	Transcription factor SOX-13 OS=Homo sapiens GN=SOX13 PE=1 SV=3	1080.49	10.0775
P31153	46	16	MAT2A	S-adenosylmethionine synthase isoform type-2 OS=Homo sapiens GN=MAT2A PE=1 SV=1	1079.14	10.0757
O15523	103	18	DDX3Y	ATP-dependent RNA helicase DDX3Y OS=Homo sapiens GN=DDX3Y PE=1 SV=2	1077.45	10.0734
P02533	94	10	KRT14	Keratin_ type I cytoskeletal 14 OS=Homo sapiens GN=KRT14 PE=1 SV=4	1075.61	10.0709
P21796	59	21	VDAC1	Voltage-dependent anion-selective channel protein 1 OS=Homo sapiens GN=VDAC1 PE=1 SV=2	1075.4	10.0707
P62491	38	6	RAB11A	Ras-related protein Rab-11A OS=Homo sapiens GN=RAB11A PE=1 SV=3	1073.41	10.068
Q86U42	24	9	PABPN1	Polyadenylate-binding protein 2 OS=Homo sapiens GN=PABPN1 PE=1 SV=3	1072.63	10.0669
P19623	6	2	SRM	Spermidine synthase OS=Homo sapiens GN=SRM PE=1 SV=1	1071.29	10.0651
P12931	31	8	SRC	Proto-oncogene tyrosine-protein kinase Src OS=Homo sapiens GN=SRC PE=1 SV=3	1069.01	10.0621
Q14324	28	8	MYBPC2	Myosin-binding protein C_ fast-type OS=Homo sapiens GN=MYBPC2 PE=1 SV=2	1068.96	10.062
Q9NR30	50	14	DDX21	Nucleolar RNA helicase 2 OS=Homo sapiens GN=DDX21 PE=1 SV=5	1068.69	10.0616
P0DMV8	124	30	HSPA1A	Heat shock 70 kDa protein 1A OS=Homo sapiens GN=HSPA1A PE=1 SV=1	1066.75	10.059
Q16851	131	29	UGP2	UTP--glucose-1-phosphate uridylyltransferase OS=Homo sapiens GN=UGP2 PE=1 SV=5	1064.98	10.0566
O60701	52	17	UGDH	UDP-glucose 6-dehydrogenase OS=Homo sapiens GN=UGDH PE=1 SV=1	1059.32	10.0489
P28070	19	6	PSMB4	Proteasome subunit beta type-4 OS=Homo sapiens GN=PSMB4 PE=1 SV=4	1057.88	10.047
Q5SW79	180	17	CEP170	Centrosomal protein of 170 kDa OS=Homo sapiens GN=CEP170 PE=1 SV=1	1057.33	10.0462
P17661	65	15	DES	Desmin OS=Homo sapiens GN=DES PE=1 SV=3	1054.72	10.0426
Q9Y376	31	2	CAB39	Calcium-binding protein 39 OS=Homo sapiens GN=CAB39 PE=1 SV=1	1054.63	10.0425
Q8IYT4	28	6	KATNAL2	Katanin p60 ATPase-containing subunit A-like 2 OS=Homo sapiens GN=KATNAL2 PE=1 SV=3	1053.16	10.0405
P54707	52	13	ATP12A	Potassium-transporting ATPase alpha chain 2 OS=Homo sapiens GN=ATP12A PE=1 SV=3	1051.71	10.0385
P16989	30	9	YBX3	Y-box-binding protein 3 OS=Homo sapiens GN=YBX3 PE=1 SV=4	1048.56	10.0342
P36871	65	29	PGM1	Phosphoglucomutase-1 OS=Homo sapiens GN=PGM1 PE=1 SV=3	1046.17	10.0309
Q15102	29	10	PAFAH1B3	Platelet-activating factor acetylhydrolase IB subunit gamma OS=Homo sapiens GN=PAFAH1B3 PE=1 SV=1	1042.3	10.0256
P24539	31	6	ATP5F1	ATP synthase F(0) complex subunit B1_ mitochondrial OS=Homo sapiens GN=ATP5F1 PE=1 SV=2	1042.21	10.0254
O75083	80	33	WDR1	WD repeat-containing protein 1 OS=Homo sapiens GN=WDR1 PE=1 SV=4	1041.99	10.0251
Q16181	75	10	SEPT7	Septin-7 OS=Homo sapiens GN=SEPT7 PE=1 SV=2	1041.62	10.0246
Q9UJN7	17	4	ZNF391	Zinc finger protein 391 OS=Homo sapiens GN=ZNF391 PE=2 SV=2	1041.43	10.0244
P39656	34	6	DDOST	Dolichyl-diphosphooligosaccharide--protein glycosyltransferase 48 kDa subunit OS=Homo sapiens GN=DDOST PE=1 SV=4	1040	10.0224
Q9UMS4	39	9	PRPF19	Pre-mRNA-processing factor 19 OS=Homo sapiens GN=PRPF19 PE=1 SV=1	1039.38	10.0215
O43242	74	29	PSMD3	26S proteasome non-ATPase regulatory subunit 3 OS=Homo sapiens GN=PSMD3 PE=1 SV=2	1039.25	10.0213
Q8NB66	80	20	UNC13C	Protein unc-13 homolog C OS=Homo sapiens GN=UNC13C PE=2 SV=3	1036.93	10.0181
Q9UG01	102	15	IFT172	Intraflagellar transport protein 172 homolog OS=Homo sapiens GN=IFT172 PE=1 SV=2	1036.31	10.0172
P53999	20	8	SUB1	Activated RNA polymerase II transcriptional coactivator p15 OS=Homo sapiens GN=SUB1 PE=1 SV=3	1035.78	10.0165
Q9NSB2	42	8	KRT84	Keratin_ type II cuticular Hb4 OS=Homo sapiens GN=KRT84 PE=2 SV=2	1033.79	10.0137
A0A0J9YY01	50	6	MYO15B	Unconventional myosin-XVB OS=Homo sapiens GN=MYO15B PE=1 SV=1	1032.84	10.0124
Q8WXE1	15	2	ATRIP	ATR-interacting protein OS=Homo sapiens GN=ATRIP PE=1 SV=1	1030.16	10.0087
P50453	39	19	SERPINB9	Serpin B9 OS=Homo sapiens GN=SERPINB9 PE=1 SV=1	1028.97	10.007
A1L4K1	20	6	FSD2	Fibronectin type III and SPRY domain-containing protein 2 OS=Homo sapiens GN=FSD2 PE=1 SV=1	1027.89	10.0055
Q12802	135	12	AKAP13	A-kinase anchor protein 13 OS=Homo sapiens GN=AKAP13 PE=1 SV=2	1027	10.0042
O95803	8	2	NDST3	Bifunctional heparan sulfate N-deacetylase/N-sulfotransferase 3 OS=Homo sapiens GN=NDST3 PE=2 SV=1	1026.5	10.0035
Q9Y2I6	22	5	NINL	Ninein-like protein OS=Homo sapiens GN=NINL PE=1 SV=2	1025.53	10.0022
A8MUV8	6	2	ZNF727	Putative zinc finger protein 727 OS=Homo sapiens GN=ZNF727 PE=5 SV=3	1024.33	10.0005
Q9ULK5	28	12	VANGL2	Vang-like protein 2 OS=Homo sapiens GN=VANGL2 PE=1 SV=2	1022.81	9.99832
O75369	267	37	FLNB	Filamin-B OS=Homo sapiens GN=FLNB PE=1 SV=2	1020.84	9.99554
Q8NBX0	19	7	SCCPDH	Saccharopine dehydrogenase-like oxidoreductase OS=Homo sapiens GN=SCCPDH PE=1 SV=1	1016.01	9.9887
Q9H2D6	153	27	TRIOBP	TRIO and F-actin-binding protein OS=Homo sapiens GN=TRIOBP PE=1 SV=3	1014.83	9.98702
Q9UEY8	27	7	ADD3	Gamma-adducin OS=Homo sapiens GN=ADD3 PE=1 SV=1	1011.58	9.9824
Q8NI77	23	2	KIF18A	Kinesin-like protein KIF18A OS=Homo sapiens GN=KIF18A PE=1 SV=2	1010.71	9.98116
Q8WXA9	86	19	SREK1	Splicing regulatory glutamine/lysine-rich protein 1 OS=Homo sapiens GN=SREK1 PE=1 SV=1	1010.23	9.98046
Q3L8U1	142	18	CHD9	Chromodomain-helicase-DNA-binding protein 9 OS=Homo sapiens GN=CHD9 PE=1 SV=2	1007.87	9.9771
O14578	161	14	CIT	Citron Rho-interacting kinase OS=Homo sapiens GN=CIT PE=1 SV=2	1005.32	9.97344
Q96JF6	14	2	ZNF594	Zinc finger protein 594 OS=Homo sapiens GN=ZNF594 PE=2 SV=3	1004.49	9.97225
Q96AY4	102	2	TTC28	Tetratricopeptide repeat protein 28 OS=Homo sapiens GN=TTC28 PE=1 SV=4	1003.72	9.97114
Q9UDT6	127	33	CLIP2	CAP-Gly domain-containing linker protein 2 OS=Homo sapiens GN=CLIP2 PE=1 SV=1	1003.7	9.97112
Q15181	60	21	PPA1	Inorganic pyrophosphatase OS=Homo sapiens GN=PPA1 PE=1 SV=2	1000.16	9.96601
P42025	34	6	ACTR1B	Beta-centractin OS=Homo sapiens GN=ACTR1B PE=1 SV=1	998.943	9.96426
Q12840	97	3	KIF5A	Kinesin heavy chain isoform 5A OS=Homo sapiens GN=KIF5A PE=1 SV=2	993.237	9.95599
Q9NR45	14	3	NANS	Sialic acid synthase OS=Homo sapiens GN=NANS PE=1 SV=2	991.418	9.95335
A0A1B0GVW8	71	4	UNC13B	Protein unc-13 homolog B OS=Homo sapiens GN=UNC13B PE=1 SV=1	991.231	9.95308
O94876	19	2	TMCC1	Transmembrane and coiled-coil domains protein 1 OS=Homo sapiens GN=TMCC1 PE=1 SV=3	991.153	9.95296
P43034	76	18	PAFAH1B1	Platelet-activating factor acetylhydrolase IB subunit alpha OS=Homo sapiens GN=PAFAH1B1 PE=1 SV=2	987.952	9.9483
Q9P0L1	24	4	ZKSCAN7	Zinc finger protein with KRAB and SCAN domains 7 OS=Homo sapiens GN=ZKSCAN7 PE=1 SV=2	983.325	9.94153
O15498	15	5	YKT6	Synaptobrevin homolog YKT6 OS=Homo sapiens GN=YKT6 PE=1 SV=1	980.129	9.93683
Q9NV70	20	5	EXOC1	Exocyst complex component 1 OS=Homo sapiens GN=EXOC1 PE=1 SV=4	979.329	9.93565
O43423	24	7	ANP32C	Acidic leucine-rich nuclear phosphoprotein 32 family member C OS=Homo sapiens GN=ANP32C PE=2 SV=1	978.969	9.93512
O43390	91	26	HNRNPR	Heterogeneous nuclear ribonucleoprotein R OS=Homo sapiens GN=HNRNPR PE=1 SV=1	974.737	9.92887
P45974	102	34	USP5	Ubiquitin carboxyl-terminal hydrolase 5 OS=Homo sapiens GN=USP5 PE=1 SV=2	972.342	9.92532
Q9UJZ1	48	7	STOML2	Stomatin-like protein 2_ mitochondrial OS=Homo sapiens GN=STOML2 PE=1 SV=1	970.922	9.92321
Q9NXG0	12	2	CNTLN	Centlein OS=Homo sapiens GN=CNTLN PE=1 SV=5	969.689	9.92138
Q5JPF3	147	9	ANKRD36C	Ankyrin repeat domain-containing protein 36C OS=Homo sapiens GN=ANKRD36C PE=1 SV=3	968.2	9.91916
Q12765	52	15	SCRN1	Secernin-1 OS=Homo sapiens GN=SCRN1 PE=1 SV=2	965.43	9.91503
Q9NSK0	57	7	KLC4	Kinesin light chain 4 OS=Homo sapiens GN=KLC4 PE=1 SV=3	959.488	9.90612
P12036	76	15	NEFH	Neurofilament heavy polypeptide OS=Homo sapiens GN=NEFH PE=1 SV=4	959.219	9.90572
Q7Z3E2	38	7	CCDC186	Coiled-coil domain-containing protein 186 OS=Homo sapiens GN=CCDC186 PE=1 SV=2	957.991	9.90387
Q5THJ4	223	19	VPS13D	Vacuolar protein sorting-associated protein 13D OS=Homo sapiens GN=VPS13D PE=1 SV=2	957.66	9.90337
Q70CQ4	11	3	USP31	Ubiquitin carboxyl-terminal hydrolase 31 OS=Homo sapiens GN=USP31 PE=2 SV=2	957.552	9.90321
O95347	127	24	SMC2	Structural maintenance of chromosomes protein 2 OS=Homo sapiens GN=SMC2 PE=1 SV=2	955.184	9.89964
Q01484	394	24	ANK2	Ankyrin-2 OS=Homo sapiens GN=ANK2 PE=1 SV=4	954.648	9.89882
P30837	42	12	ALDH1B1	Aldehyde dehydrogenase X_ mitochondrial OS=Homo sapiens GN=ALDH1B1 PE=1 SV=3	953.329	9.89683
P42166	79	23	TMPO	Lamina-associated polypeptide 2_ isoform alpha OS=Homo sapiens GN=TMPO PE=1 SV=2	949.861	9.89157
P28066	31	15	PSMA5	Proteasome subunit alpha type-5 OS=Homo sapiens GN=PSMA5 PE=1 SV=3	949.014	9.89029
Q8TC05	10	2	MDM1	Nuclear protein MDM1 OS=Homo sapiens GN=MDM1 PE=1 SV=2	948.023	9.88878
O43166	103	11	SIPA1L1	Signal-induced proliferation-associated 1-like protein 1 OS=Homo sapiens GN=SIPA1L1 PE=1 SV=4	947.779	9.88841
Q9NRN7	29	8	AASDHPPT	L-aminoadipate-semialdehyde dehydrogenase-phosphopantetheinyl transferase OS=Homo sapiens GN=AASDHPPT PE=1 SV=2	947.296	9.88767
Q14194	129	30	CRMP1	Dihydropyrimidinase-related protein 1 OS=Homo sapiens GN=CRMP1 PE=1 SV=1	946.492	9.88645
Q92614	119	7	MYO18A	Unconventional myosin-XVIIIa OS=Homo sapiens GN=MYO18A PE=1 SV=3	943.453	9.88181
Q15717	46	14	ELAVL1	ELAV-like protein 1 OS=Homo sapiens GN=ELAVL1 PE=1 SV=2	941.649	9.87905
Q08378	125	27	GOLGA3	Golgin subfamily A member 3 OS=Homo sapiens GN=GOLGA3 PE=1 SV=2	939.182	9.87526
O43719	61	17	HTATSF1	HIV Tat-specific factor 1 OS=Homo sapiens GN=HTATSF1 PE=1 SV=1	937.914	9.87331
Q08AD1	21	4	CAMSAP2	Calmodulin-regulated spectrin-associated protein 2 OS=Homo sapiens GN=CAMSAP2 PE=1 SV=3	936.257	9.87076
Q9H3R1	9	2	NDST4	Bifunctional heparan sulfate N-deacetylase/N-sulfotransferase 4 OS=Homo sapiens GN=NDST4 PE=2 SV=1	936.125	9.87056
E9PR05	58	6	KMT2A	Histone-lysine N-methyltransferase 2A (Fragment) OS=Homo sapiens GN=KMT2A PE=1 SV=2	934.969	9.86877
Q15417	48	14	CNN3	Calponin-3 OS=Homo sapiens GN=CNN3 PE=1 SV=1	934.348	9.86782
P35612	87	21	ADD2	Beta-adducin OS=Homo sapiens GN=ADD2 PE=1 SV=3	928.747	9.85914
Q2NL82	15	4	TSR1	Pre-rRNA-processing protein TSR1 homolog OS=Homo sapiens GN=TSR1 PE=1 SV=1	928.506	9.85877
Q9Y512	28	8	SAMM50	Sorting and assembly machinery component 50 homolog OS=Homo sapiens GN=SAMM50 PE=1 SV=3	927.747	9.85759
Q15459	106	38	SF3A1	Splicing factor 3A subunit 1 OS=Homo sapiens GN=SF3A1 PE=1 SV=1	923.721	9.85131
Q6Y7W6	72	4	GIGYF2	GRB10-interacting GYF protein 2 OS=Homo sapiens GN=GIGYF2 PE=1 SV=1	922.613	9.84958
Q69YQ0	38	4	SPECC1L	Cytospin-A OS=Homo sapiens GN=SPECC1L PE=1 SV=2	916.729	9.84035
P52564	18	5	MAP2K6	Dual specificity mitogen-activated protein kinase kinase 6 OS=Homo sapiens GN=MAP2K6 PE=1 SV=1	916.692	9.84029
P22307	21	4	SCP2	Non-specific lipid-transfer protein OS=Homo sapiens GN=SCP2 PE=1 SV=2	916.517	9.84002
Q96L96	25	9	ALPK3	Alpha-protein kinase 3 OS=Homo sapiens GN=ALPK3 PE=2 SV=2	915.947	9.83912
P49756	81	11	RBM25	RNA-binding protein 25 OS=Homo sapiens GN=RBM25 PE=1 SV=3	915.314	9.83812
Q9C0G6	44	8	DNAH6	Dynein heavy chain 6_ axonemal OS=Homo sapiens GN=DNAH6 PE=2 SV=3	913.446	9.83517
Q63HN8	249	6	RNF213	E3 ubiquitin-protein ligase RNF213 OS=Homo sapiens GN=RNF213 PE=1 SV=3	912.217	9.83323
Q8TDI0	99	11	CHD5	Chromodomain-helicase-DNA-binding protein 5 OS=Homo sapiens GN=CHD5 PE=1 SV=1	911.997	9.83288
Q15075	111	21	EEA1	Early endosome antigen 1 OS=Homo sapiens GN=EEA1 PE=1 SV=2	910.697	9.83083
Q14697	147	42	GANAB	Neutral alpha-glucosidase AB OS=Homo sapiens GN=GANAB PE=1 SV=3	910.027	9.82976
P23229	61	9	ITGA6	Integrin alpha-6 OS=Homo sapiens GN=ITGA6 PE=1 SV=5	908.673	9.82762
Q14576	28	8	ELAVL3	ELAV-like protein 3 OS=Homo sapiens GN=ELAVL3 PE=2 SV=3	902.863	9.81836
P59923	37	6	ZNF445	Zinc finger protein 445 OS=Homo sapiens GN=ZNF445 PE=1 SV=1	901.773	9.81662
Q10567	80	8	AP1B1	AP-1 complex subunit beta-1 OS=Homo sapiens GN=AP1B1 PE=1 SV=2	900.476	9.81454
P78347	133	50	GTF2I	General transcription factor II-I OS=Homo sapiens GN=GTF2I PE=1 SV=2	896.067	9.80746
Q6IC98	14	3	GRAMD4	GRAM domain-containing protein 4 OS=Homo sapiens GN=GRAMD4 PE=1 SV=1	894.993	9.80573
Q9UHP3	49	6	USP25	Ubiquitin carboxyl-terminal hydrolase 25 OS=Homo sapiens GN=USP25 PE=1 SV=4	894.118	9.80432
Q16643	104	20	DBN1	Drebrin OS=Homo sapiens GN=DBN1 PE=1 SV=4	893.996	9.80412
P50502	70	13	ST13	Hsc70-interacting protein OS=Homo sapiens GN=ST13 PE=1 SV=2	893.039	9.80258
P48723	6	4	HSPA13	Heat shock 70 kDa protein 13 OS=Homo sapiens GN=HSPA13 PE=1 SV=1	891.966	9.80085
P14136	112	17	GFAP	Glial fibrillary acidic protein OS=Homo sapiens GN=GFAP PE=1 SV=1	891.179	9.79957
Q9P2D1	54	7	CHD7	Chromodomain-helicase-DNA-binding protein 7 OS=Homo sapiens GN=CHD7 PE=1 SV=3	889.64	9.79708
P42765	41	7	ACAA2	3-ketoacyl-CoA thiolase_ mitochondrial OS=Homo sapiens GN=ACAA2 PE=1 SV=2	887.749	9.79401
P12882	136	9	MYH1	Myosin-1 OS=Homo sapiens GN=MYH1 PE=1 SV=3	886.084	9.7913
O60333	75	3	KIF1B	Kinesin-like protein KIF1B OS=Homo sapiens GN=KIF1B PE=1 SV=5	885.941	9.79107
Q9H7F0	6	2	ATP13A3	Probable cation-transporting ATPase 13A3 OS=Homo sapiens GN=ATP13A3 PE=1 SV=4	885.826	9.79088
P25205	119	25	MCM3	DNA replication licensing factor MCM3 OS=Homo sapiens GN=MCM3 PE=1 SV=3	878.408	9.77875
Q15056	38	17	EIF4H	Eukaryotic translation initiation factor 4H OS=Homo sapiens GN=EIF4H PE=1 SV=5	877.663	9.77752
P55010	40	10	EIF5	Eukaryotic translation initiation factor 5 OS=Homo sapiens GN=EIF5 PE=1 SV=2	876.711	9.77596
P49448	83	17	GLUD2	Glutamate dehydrogenase 2_ mitochondrial OS=Homo sapiens GN=GLUD2 PE=1 SV=2	874.683	9.77262
O15400	19	6	STX7	Syntaxin-7 OS=Homo sapiens GN=STX7 PE=1 SV=4	874.227	9.77186
Q9Y6Y1	23	2	CAMTA1	Calmodulin-binding transcription activator 1 OS=Homo sapiens GN=CAMTA1 PE=1 SV=4	872.194	9.76851
O43809	27	10	NUDT21	Cleavage and polyadenylation specificity factor subunit 5 OS=Homo sapiens GN=NUDT21 PE=1 SV=1	870.975	9.76649
E9PG32	184	5	DNAH12	Dynein heavy chain 12_ axonemal OS=Homo sapiens GN=DNAH12 PE=1 SV=2	869.383	9.76385
Q07075	18	2	ENPEP	Glutamyl aminopeptidase OS=Homo sapiens GN=ENPEP PE=1 SV=3	869.024	9.76325
P48449	54	4	LSS	Lanosterol synthase OS=Homo sapiens GN=LSS PE=1 SV=1	867.639	9.76095
O00763	176	29	ACACB	Acetyl-CoA carboxylase 2 OS=Homo sapiens GN=ACACB PE=1 SV=3	866.858	9.75965
Q5JWF2	62	11	GNAS	Guanine nucleotide-binding protein G(s) subunit alpha isoforms XLas OS=Homo sapiens GN=GNAS PE=1 SV=2	863.536	9.75411
P26196	62	25	DDX6	Probable ATP-dependent RNA helicase DDX6 OS=Homo sapiens GN=DDX6 PE=1 SV=2	863.501	9.75405
Q6Q759	83	18	SPAG17	Sperm-associated antigen 17 OS=Homo sapiens GN=SPAG17 PE=2 SV=1	862.925	9.75309
Q9Y2Z0	47	12	SUGT1	Protein SGT1 homolog OS=Homo sapiens GN=SUGT1 PE=1 SV=3	860.532	9.74908
P02545	111	10	LMNA	Prelamin-A/C OS=Homo sapiens GN=LMNA PE=1 SV=1	859.109	9.7467
Q9Y230	99	23	RUVBL2	RuvB-like 2 OS=Homo sapiens GN=RUVBL2 PE=1 SV=3	856.805	9.74282
Q14571	79	9	ITPR2	Inositol 1_4_5-trisphosphate receptor type 2 OS=Homo sapiens GN=ITPR2 PE=1 SV=2	855.645	9.74087
Q15437	42	4	SEC23B	Protein transport protein Sec23B OS=Homo sapiens GN=SEC23B PE=1 SV=2	853.344	9.73698
A0A1B0GUS7	266	46	UNC13B	Protein unc-13 homolog B OS=Homo sapiens GN=UNC13B PE=1 SV=1	852.932	9.73629
P35241	96	14	RDX	Radixin OS=Homo sapiens GN=RDX PE=1 SV=1	852.237	9.73511
P17987	124	24	TCP1	T-complex protein 1 subunit alpha OS=Homo sapiens GN=TCP1 PE=1 SV=1	851.957	9.73464
Q5SRE5	20	5	NUP188	Nucleoporin NUP188 homolog OS=Homo sapiens GN=NUP188 PE=1 SV=1	851.282	9.73349
Q3MIS6	18	2	ZNF528	Zinc finger protein 528 OS=Homo sapiens GN=ZNF528 PE=2 SV=1	850.29	9.73181
Q8N9I0	15	4	SYT2	Synaptotagmin-2 OS=Homo sapiens GN=SYT2 PE=1 SV=2	845.935	9.7244
P49815	50	5	TSC2	Tuberin OS=Homo sapiens GN=TSC2 PE=1 SV=2	845.284	9.72329
P98172	33	12	EFNB1	Ephrin-B1 OS=Homo sapiens GN=EFNB1 PE=1 SV=1	843.862	9.72086
P54886	53	23	ALDH18A1	Delta-1-pyrroline-5-carboxylate synthase OS=Homo sapiens GN=ALDH18A1 PE=1 SV=2	842.893	9.71921
Q9C0J8	60	13	WDR33	pre-mRNA 3' end processing protein WDR33 OS=Homo sapiens GN=WDR33 PE=1 SV=2	841.399	9.71665
Q9NZZ3	16	5	CHMP5	Charged multivesicular body protein 5 OS=Homo sapiens GN=CHMP5 PE=1 SV=1	840.928	9.71584
P26599	76	21	PTBP1	Polypyrimidine tract-binding protein 1 OS=Homo sapiens GN=PTBP1 PE=1 SV=1	839.604	9.71357
P49841	20	3	GSK3B	Glycogen synthase kinase-3 beta OS=Homo sapiens GN=GSK3B PE=1 SV=2	833.624	9.70325
O14773	13	6	TPP1	Tripeptidyl-peptidase 1 OS=Homo sapiens GN=TPP1 PE=1 SV=2	832.199	9.70078
Q8IVG5	76	15	SAMD9L	Sterile alpha motif domain-containing protein 9-like OS=Homo sapiens GN=SAMD9L PE=1 SV=2	832.128	9.70066
Q6PJI9	29	7	WDR59	GATOR complex protein WDR59 OS=Homo sapiens GN=WDR59 PE=1 SV=2	830.706	9.69819
Q99962	44	11	SH3GL2	Endophilin-A1 OS=Homo sapiens GN=SH3GL2 PE=1 SV=1	828.706	9.69472
P22234	108	20	PAICS	Multifunctional protein ADE2 OS=Homo sapiens GN=PAICS PE=1 SV=3	828.399	9.69418
P12081	55	4	HARS	Histidine--tRNA ligase_ cytoplasmic OS=Homo sapiens GN=HARS PE=1 SV=2	827.362	9.69238
O60282	180	20	KIF5C	Kinesin heavy chain isoform 5C OS=Homo sapiens GN=KIF5C PE=1 SV=1	826.273	9.69047
O14594	27	10	NCAN	Neurocan core protein OS=Homo sapiens GN=NCAN PE=1 SV=3	826.144	9.69025
O60341	57	20	KDM1A	Lysine-specific histone demethylase 1A OS=Homo sapiens GN=KDM1A PE=1 SV=2	824.843	9.68798
P13647	110	21	KRT5	Keratin_ type II cytoskeletal 5 OS=Homo sapiens GN=KRT5 PE=1 SV=3	823.338	9.68534
Q15046	73	31	KARS	Lysine--tRNA ligase OS=Homo sapiens GN=KARS PE=1 SV=3	821.642	9.68237
Q8WXX5	24	9	DNAJC9	DnaJ homolog subfamily C member 9 OS=Homo sapiens GN=DNAJC9 PE=1 SV=1	820.042	9.67955
Q9NRW1	38	10	RAB6B	Ras-related protein Rab-6B OS=Homo sapiens GN=RAB6B PE=1 SV=1	819.596	9.67877
O60763	82	32	USO1	General vesicular transport factor p115 OS=Homo sapiens GN=USO1 PE=1 SV=2	819.081	9.67786
P49419	65	12	ALDH7A1	Alpha-aminoadipic semialdehyde dehydrogenase OS=Homo sapiens GN=ALDH7A1 PE=1 SV=5	818.75	9.67728
Q16352	131	65	INA	Alpha-internexin OS=Homo sapiens GN=INA PE=1 SV=2	817.633	9.67531
Q9Y5Y9	17	5	SCN10A	Sodium channel protein type 10 subunit alpha OS=Homo sapiens GN=SCN10A PE=1 SV=2	817.183	9.67452
Q8N7X1	14	2	RBMXL3	RNA-binding motif protein_ X-linked-like-3 OS=Homo sapiens GN=RBMXL3 PE=2 SV=2	815.659	9.67182
Q05682	126	16	CALD1	Caldesmon OS=Homo sapiens GN=CALD1 PE=1 SV=3	815.449	9.67145
Q86WN1	14	2	FCHSD1	F-BAR and double SH3 domains protein 1 OS=Homo sapiens GN=FCHSD1 PE=1 SV=1	811.356	9.66419
Q14123	18	2	PDE1C	Calcium/calmodulin-dependent 3'_5'-cyclic nucleotide phosphodiesterase 1C OS=Homo sapiens GN=PDE1C PE=1 SV=1	807.737	9.65774
P47755	33	8	CAPZA2	F-actin-capping protein subunit alpha-2 OS=Homo sapiens GN=CAPZA2 PE=1 SV=3	806.851	9.65616
P23528	68	25	CFL1	Cofilin-1 OS=Homo sapiens GN=CFL1 PE=1 SV=3	806.625	9.65575
Q3ZCM7	54	11	TUBB8	Tubulin beta-8 chain OS=Homo sapiens GN=TUBB8 PE=1 SV=2	804.777	9.65245
Q13442	22	8	PDAP1	28 kDa heat- and acid-stable phosphoprotein OS=Homo sapiens GN=PDAP1 PE=1 SV=1	804.125	9.65128
Q86T82	19	2	USP37	Ubiquitin carboxyl-terminal hydrolase 37 OS=Homo sapiens GN=USP37 PE=1 SV=2	803.191	9.6496
P13591	136	22	NCAM1	Neural cell adhesion molecule 1 OS=Homo sapiens GN=NCAM1 PE=1 SV=3	802.949	9.64917
P00390	29	9	GSR	Glutathione reductase_ mitochondrial OS=Homo sapiens GN=GSR PE=1 SV=2	800.699	9.64512
P60842	117	24	EIF4A1	Eukaryotic initiation factor 4A-I OS=Homo sapiens GN=EIF4A1 PE=1 SV=1	800.332	9.64446
O75037	52	9	KIF21B	Kinesin-like protein KIF21B OS=Homo sapiens GN=KIF21B PE=1 SV=2	799.05	9.64214
P48556	18	2	PSMD8	26S proteasome non-ATPase regulatory subunit 8 OS=Homo sapiens GN=PSMD8 PE=1 SV=2	798.527	9.6412
P13674	23	4	P4HA1	Prolyl 4-hydroxylase subunit alpha-1 OS=Homo sapiens GN=P4HA1 PE=1 SV=2	798.31	9.64081
Q9NTZ6	54	17	RBM12	RNA-binding protein 12 OS=Homo sapiens GN=RBM12 PE=1 SV=1	797.979	9.64021
O43290	76	19	SART1	U4/U6.U5 tri-snRNP-associated protein 1 OS=Homo sapiens GN=SART1 PE=1 SV=1	795.814	9.63629
Q6ZP82	93	11	CCDC141	Coiled-coil domain-containing protein 141 OS=Homo sapiens GN=CCDC141 PE=1 SV=2	794.335	9.6336
Q8IWV7	45	2	UBR1	E3 ubiquitin-protein ligase UBR1 OS=Homo sapiens GN=UBR1 PE=1 SV=1	792.72	9.63067
Q7Z7G8	114	20	VPS13B	Vacuolar protein sorting-associated protein 13B OS=Homo sapiens GN=VPS13B PE=1 SV=2	790.828	9.62722
Q9P219	117	18	CCDC88C	Protein Daple OS=Homo sapiens GN=CCDC88C PE=1 SV=3	790.245	9.62616
P17858	73	22	PFKL	ATP-dependent 6-phosphofructokinase_ liver type OS=Homo sapiens GN=PFKL PE=1 SV=6	787.813	9.62171
Q96T51	29	3	RUFY1	RUN and FYVE domain-containing protein 1 OS=Homo sapiens GN=RUFY1 PE=1 SV=2	785.571	9.6176
Q8IWI9	111	22	MGA	MAX gene-associated protein OS=Homo sapiens GN=MGA PE=1 SV=3	783.542	9.61387
Q9Y2I7	74	3	PIKFYVE	1-phosphatidylinositol 3-phosphate 5-kinase OS=Homo sapiens GN=PIKFYVE PE=1 SV=3	783.403	9.61361
O00178	18	3	GTPBP1	GTP-binding protein 1 OS=Homo sapiens GN=GTPBP1 PE=1 SV=3	782.966	9.61281
Q8WWL7	62	6	CCNB3	G2/mitotic-specific cyclin-B3 OS=Homo sapiens GN=CCNB3 PE=1 SV=2	781.797	9.61065
P46063	23	4	RECQL	ATP-dependent DNA helicase Q1 OS=Homo sapiens GN=RECQL PE=1 SV=3	777.872	9.60339
Q86TP1	6	2	PRUNE1	Exopolyphosphatase PRUNE1 OS=Homo sapiens GN=PRUNE1 PE=1 SV=2	775.619	9.5992
Q9P2R6	52	6	RERE	Arginine-glutamic acid dipeptide repeats protein OS=Homo sapiens GN=RERE PE=1 SV=2	775.505	9.59899
P46777	57	24	RPL5	60S ribosomal protein L5 OS=Homo sapiens GN=RPL5 PE=1 SV=3	774.143	9.59646
P05141	37	9	SLC25A5	ADP/ATP translocase 2 OS=Homo sapiens GN=SLC25A5 PE=1 SV=7	772.546	9.59348
Q9H583	68	6	HEATR1	HEAT repeat-containing protein 1 OS=Homo sapiens GN=HEATR1 PE=1 SV=3	771.514	9.59155
Q13439	390	26	GOLGA4	Golgin subfamily A member 4 OS=Homo sapiens GN=GOLGA4 PE=1 SV=1	769.66	9.58808
Q4L180	40	3	FILIP1L	Filamin A-interacting protein 1-like OS=Homo sapiens GN=FILIP1L PE=1 SV=2	768.081	9.58512
Q9NPH2	53	19	ISYNA1	Inositol-3-phosphate synthase 1 OS=Homo sapiens GN=ISYNA1 PE=1 SV=1	766.48	9.5821
Q9NTI5	41	6	PDS5B	Sister chromatid cohesion protein PDS5 homolog B OS=Homo sapiens GN=PDS5B PE=1 SV=1	765.986	9.58118
P23469	15	4	PTPRE	Receptor-type tyrosine-protein phosphatase epsilon OS=Homo sapiens GN=PTPRE PE=1 SV=1	765.868	9.58095
Q86SE5	4	2	RALYL	RNA-binding Raly-like protein OS=Homo sapiens GN=RALYL PE=1 SV=2	764.627	9.57861
O60231	30	2	DHX16	Putative pre-mRNA-splicing factor ATP-dependent RNA helicase DHX16 OS=Homo sapiens GN=DHX16 PE=1 SV=2	763.767	9.57699
A0A1B0GWD8	91	7	SPEF2	Sperm flagellar protein 2 OS=Homo sapiens GN=SPEF2 PE=1 SV=1	761.75	9.57317
Q9H0Q0	29	4	FAM49A	Protein FAM49A OS=Homo sapiens GN=FAM49A PE=2 SV=1	759.858	9.56959
P15822	145	11	HIVEP1	Zinc finger protein 40 OS=Homo sapiens GN=HIVEP1 PE=1 SV=3	756.991	9.56413
P20073	36	13	ANXA7	Annexin A7 OS=Homo sapiens GN=ANXA7 PE=1 SV=3	754.82	9.55999
P23471	32	9	PTPRZ1	Receptor-type tyrosine-protein phosphatase zeta OS=Homo sapiens GN=PTPRZ1 PE=1 SV=4	754.679	9.55972
P55786	149	25	NPEPPS	Puromycin-sensitive aminopeptidase OS=Homo sapiens GN=NPEPPS PE=1 SV=2	754.629	9.55962
O95391	38	8	SLU7	Pre-mRNA-splicing factor SLU7 OS=Homo sapiens GN=SLU7 PE=1 SV=2	752.005	9.5546
Q96DT5	128	2	DNAH11	Dynein heavy chain 11_ axonemal OS=Homo sapiens GN=DNAH11 PE=1 SV=4	750.499	9.55171
Q9NQT8	93	13	KIF13B	Kinesin-like protein KIF13B OS=Homo sapiens GN=KIF13B PE=1 SV=2	750.232	9.55119
Q8NC51	74	25	SERBP1	Plasminogen activator inhibitor 1 RNA-binding protein OS=Homo sapiens GN=SERBP1 PE=1 SV=2	746.355	9.54372
P15170	44	3	GSPT1	Eukaryotic peptide chain release factor GTP-binding subunit ERF3A OS=Homo sapiens GN=GSPT1 PE=1 SV=1	746.146	9.54331
Q9Y566	20	3	SHANK1	SH3 and multiple ankyrin repeat domains protein 1 OS=Homo sapiens GN=SHANK1 PE=1 SV=2	746.021	9.54307
Q12996	50	13	CSTF3	Cleavage stimulation factor subunit 3 OS=Homo sapiens GN=CSTF3 PE=1 SV=1	744.379	9.53989
Q6ZVH7	11	3	ESPNL	Espin-like protein OS=Homo sapiens GN=ESPNL PE=2 SV=3	742.641	9.53652
Q05193	134	15	DNM1	Dynamin-1 OS=Homo sapiens GN=DNM1 PE=1 SV=2	741.772	9.53483
P05062	22	3	ALDOB	Fructose-bisphosphate aldolase B OS=Homo sapiens GN=ALDOB PE=1 SV=2	740.235	9.53184
P49643	15	2	PRIM2	DNA primase large subunit OS=Homo sapiens GN=PRIM2 PE=1 SV=2	740.097	9.53157
A0A0D9SF30	38	13	NCAM1	Neural cell adhesion molecule 1 (Fragment) OS=Homo sapiens GN=NCAM1 PE=1 SV=1	739.932	9.53125
Q3SY69	11	3	ALDH1L2	Mitochondrial 10-formyltetrahydrofolate dehydrogenase OS=Homo sapiens GN=ALDH1L2 PE=1 SV=2	735.468	9.52252
O75449	16	5	KATNA1	Katanin p60 ATPase-containing subunit A1 OS=Homo sapiens GN=KATNA1 PE=1 SV=1	734.667	9.52095
Q9HA77	9	2	CARS2	Probable cysteine--tRNA ligase_ mitochondrial OS=Homo sapiens GN=CARS2 PE=1 SV=1	734.326	9.52028
P49903	24	10	SEPHS1	Selenide_ water dikinase 1 OS=Homo sapiens GN=SEPHS1 PE=1 SV=2	733.216	9.5181
Q15746	31	8	MYLK	Myosin light chain kinase_ smooth muscle OS=Homo sapiens GN=MYLK PE=1 SV=4	732.027	9.51575
P53814	50	4	SMTN	Smoothelin OS=Homo sapiens GN=SMTN PE=1 SV=7	727.822	9.50744
P50148	43	7	GNAQ	Guanine nucleotide-binding protein G(q) subunit alpha OS=Homo sapiens GN=GNAQ PE=1 SV=4	725.847	9.50352
Q8N8A2	11	2	ANKRD44	Serine/threonine-protein phosphatase 6 regulatory ankyrin repeat subunit B OS=Homo sapiens GN=ANKRD44 PE=1 SV=3	724.884	9.50161
P49915	67	21	GMPS	GMP synthase [glutamine-hydrolyzing] OS=Homo sapiens GN=GMPS PE=1 SV=1	724.824	9.50149
P33993	106	39	MCM7	DNA replication licensing factor MCM7 OS=Homo sapiens GN=MCM7 PE=1 SV=4	724.751	9.50134
P02786	74	5	TFRC	Transferrin receptor protein 1 OS=Homo sapiens GN=TFRC PE=1 SV=2	723.711	9.49927
O60303	32	3	KIAA0556	Protein KIAA0556 OS=Homo sapiens GN=KIAA0556 PE=1 SV=4	721.129	9.49411
Q96LZ7	6	2	RMDN2	Regulator of microtubule dynamics protein 2 OS=Homo sapiens GN=RMDN2 PE=1 SV=2	720.631	9.49312
Q9UKY1	8	2	ZHX1	Zinc fingers and homeoboxes protein 1 OS=Homo sapiens GN=ZHX1 PE=1 SV=1	719.315	9.49048
Q9NYV4	34	2	CDK12	Cyclin-dependent kinase 12 OS=Homo sapiens GN=CDK12 PE=1 SV=2	718.602	9.48905
Q6ZS30	57	10	NBEAL1	Neurobeachin-like protein 1 OS=Homo sapiens GN=NBEAL1 PE=2 SV=3	718.009	9.48786
Q9BRD0	16	6	BUD13	BUD13 homolog OS=Homo sapiens GN=BUD13 PE=1 SV=1	716.256	9.48433
Q8WYB5	43	8	KAT6B	Histone acetyltransferase KAT6B OS=Homo sapiens GN=KAT6B PE=1 SV=3	714.539	9.48087
Q05639	53	13	EEF1A2	Elongation factor 1-alpha 2 OS=Homo sapiens GN=EEF1A2 PE=1 SV=1	714.423	9.48064
Q93077	29	12	HIST1H2AC	Histone H2A type 1-C OS=Homo sapiens GN=HIST1H2AC PE=1 SV=3	713.335	9.47844
Q5JRA6	105	17	MIA3	Transport and Golgi organization protein 1 homolog OS=Homo sapiens GN=MIA3 PE=1 SV=1	713.055	9.47787
Q6AWC2	32	4	WWC2	Protein WWC2 OS=Homo sapiens GN=WWC2 PE=1 SV=2	712.083	9.4759
Q9BRL6	23	5	SRSF8	Serine/arginine-rich splicing factor 8 OS=Homo sapiens GN=SRSF8 PE=1 SV=1	711.62	9.47496
P84103	17	4	SRSF3	Serine/arginine-rich splicing factor 3 OS=Homo sapiens GN=SRSF3 PE=1 SV=1	711.204	9.47412
O00264	22	11	PGRMC1	Membrane-associated progesterone receptor component 1 OS=Homo sapiens GN=PGRMC1 PE=1 SV=3	710.466	9.47262
Q8IZC6	16	3	COL27A1	Collagen alpha-1(XXVII) chain OS=Homo sapiens GN=COL27A1 PE=1 SV=1	707.232	9.46604
P05023	121	43	ATP1A1	Sodium/potassium-transporting ATPase subunit alpha-1 OS=Homo sapiens GN=ATP1A1 PE=1 SV=1	707.016	9.4656
P35251	52	7	RFC1	Replication factor C subunit 1 OS=Homo sapiens GN=RFC1 PE=1 SV=4	701.204	9.45369
P61011	28	2	SRP54	Signal recognition particle 54 kDa protein OS=Homo sapiens GN=SRP54 PE=1 SV=1	700.755	9.45277
Q6UB98	76	19	ANKRD12	Ankyrin repeat domain-containing protein 12 OS=Homo sapiens GN=ANKRD12 PE=1 SV=3	700.565	9.45237
Q15800	5	3	MSMO1	Methylsterol monooxygenase 1 OS=Homo sapiens GN=MSMO1 PE=1 SV=1	700.382	9.452
M0QZD8	82	20	LOC400499	Uncharacterized protein OS=Homo sapiens GN=LOC400499 PE=4 SV=2	699.729	9.45065
Q07157	111	2	TJP1	Tight junction protein ZO-1 OS=Homo sapiens GN=TJP1 PE=1 SV=3	698.424	9.44796
Q8IZ21	22	2	PHACTR4	Phosphatase and actin regulator 4 OS=Homo sapiens GN=PHACTR4 PE=1 SV=1	696.801	9.4446
P46459	120	13	NSF	Vesicle-fusing ATPase OS=Homo sapiens GN=NSF PE=1 SV=3	695.896	9.44273
P61019	28	5	RAB2A	Ras-related protein Rab-2A OS=Homo sapiens GN=RAB2A PE=1 SV=1	693.01	9.43673
Q92841	144	16	DDX17	Probable ATP-dependent RNA helicase DDX17 OS=Homo sapiens GN=DDX17 PE=1 SV=2	692.335	9.43533
Q9UEE9	28	6	CFDP1	Craniofacial development protein 1 OS=Homo sapiens GN=CFDP1 PE=1 SV=1	688.856	9.42806
O15540	9	2	FABP7	Fatty acid-binding protein_ brain OS=Homo sapiens GN=FABP7 PE=1 SV=3	685.424	9.42085
O94989	4	2	ARHGEF15	Rho guanine nucleotide exchange factor 15 OS=Homo sapiens GN=ARHGEF15 PE=1 SV=4	684.171	9.41821
P11388	157	36	TOP2A	DNA topoisomerase 2-alpha OS=Homo sapiens GN=TOP2A PE=1 SV=3	682.836	9.4154
Q9BV38	17	2	WDR18	WD repeat-containing protein 18 OS=Homo sapiens GN=WDR18 PE=1 SV=2	682.276	9.41421
P26373	25	8	RPL13	60S ribosomal protein L13 OS=Homo sapiens GN=RPL13 PE=1 SV=4	681.861	9.41333
Q96K76	58	11	USP47	Ubiquitin carboxyl-terminal hydrolase 47 OS=Homo sapiens GN=USP47 PE=1 SV=3	681.362	9.41228
Q9BWW4	5	2	SSBP3	Single-stranded DNA-binding protein 3 OS=Homo sapiens GN=SSBP3 PE=1 SV=1	679.162	9.40761
P43686	64	23	PSMC4	26S proteasome regulatory subunit 6B OS=Homo sapiens GN=PSMC4 PE=1 SV=2	679.142	9.40757
O95202	47	12	LETM1	Mitochondrial proton/calcium exchanger protein OS=Homo sapiens GN=LETM1 PE=1 SV=1	678.771	9.40678
P50995	23	5	ANXA11	Annexin A11 OS=Homo sapiens GN=ANXA11 PE=1 SV=1	678.577	9.40637
Q8IX01	90	4	SUGP2	SURP and G-patch domain-containing protein 2 OS=Homo sapiens GN=SUGP2 PE=1 SV=2	672.577	9.39356
Q96ST2	55	11	IWS1	Protein IWS1 homolog OS=Homo sapiens GN=IWS1 PE=1 SV=2	672.538	9.39347
Q13595	15	3	TRA2A	Transformer-2 protein homolog alpha OS=Homo sapiens GN=TRA2A PE=1 SV=1	672.392	9.39316
Q9Y4W6	54	12	AFG3L2	AFG3-like protein 2 OS=Homo sapiens GN=AFG3L2 PE=1 SV=2	671.365	9.39095
Q66K14	26	2	TBC1D9B	TBC1 domain family member 9B OS=Homo sapiens GN=TBC1D9B PE=1 SV=3	670.503	9.3891
Q04760	15	11	GLO1	Lactoylglutathione lyase OS=Homo sapiens GN=GLO1 PE=1 SV=4	669.259	9.38642
O43865	66	10	AHCYL1	S-adenosylhomocysteine hydrolase-like protein 1 OS=Homo sapiens GN=AHCYL1 PE=1 SV=2	669.111	9.3861
Q8WZA9	43	13	IRGQ	Immunity-related GTPase family Q protein OS=Homo sapiens GN=IRGQ PE=1 SV=1	668.286	9.38432
P05556	39	11	ITGB1	Integrin beta-1 OS=Homo sapiens GN=ITGB1 PE=1 SV=2	667.459	9.38254
O95747	54	13	OXSR1	Serine/threonine-protein kinase OSR1 OS=Homo sapiens GN=OXSR1 PE=1 SV=1	667.148	9.38186
Q13177	53	20	PAK2	Serine/threonine-protein kinase PAK 2 OS=Homo sapiens GN=PAK2 PE=1 SV=3	665.283	9.37782
P31939	114	31	ATIC	Bifunctional purine biosynthesis protein PURH OS=Homo sapiens GN=ATIC PE=1 SV=3	663.996	9.37503
Q15293	50	20	RCN1	Reticulocalbin-1 OS=Homo sapiens GN=RCN1 PE=1 SV=1	663.818	9.37464
Q6DKJ4	24	4	NXN	Nucleoredoxin OS=Homo sapiens GN=NXN PE=1 SV=2	663.003	9.37287
P10586	91	10	PTPRF	Receptor-type tyrosine-protein phosphatase F OS=Homo sapiens GN=PTPRF PE=1 SV=2	662.738	9.37229
P15144	6	2	ANPEP	Aminopeptidase N OS=Homo sapiens GN=ANPEP PE=1 SV=4	659.303	9.3648
Q6PHR2	14	4	ULK3	Serine/threonine-protein kinase ULK3 OS=Homo sapiens GN=ULK3 PE=1 SV=2	659.235	9.36465
P04844	53	17	RPN2	Dolichyl-diphosphooligosaccharide--protein glycosyltransferase subunit 2 OS=Homo sapiens GN=RPN2 PE=1 SV=3	659.205	9.36458
Q9UHD9	21	5	UBQLN2	Ubiquilin-2 OS=Homo sapiens GN=UBQLN2 PE=1 SV=2	659.188	9.36455
O43149	63	10	ZZEF1	Zinc finger ZZ-type and EF-hand domain-containing protein 1 OS=Homo sapiens GN=ZZEF1 PE=1 SV=6	658.676	9.36343
Q06203	49	14	PPAT	Amidophosphoribosyltransferase OS=Homo sapiens GN=PPAT PE=1 SV=1	658.377	9.36277
Q6ZT77	5	2	ZNF826P	Putative zinc finger protein 826 OS=Homo sapiens GN=ZNF826P PE=5 SV=2	658.246	9.36248
Q13576	145	4	IQGAP2	Ras GTPase-activating-like protein IQGAP2 OS=Homo sapiens GN=IQGAP2 PE=1 SV=4	657.965	9.36187
Q8TCS8	26	2	PNPT1	Polyribonucleotide nucleotidyltransferase 1_ mitochondrial OS=Homo sapiens GN=PNPT1 PE=1 SV=2	657.696	9.36128
Q9NYL9	22	7	TMOD3	Tropomodulin-3 OS=Homo sapiens GN=TMOD3 PE=1 SV=1	656.098	9.35777
Q99471	5	2	PFDN5	Prefoldin subunit 5 OS=Homo sapiens GN=PFDN5 PE=1 SV=2	655.483	9.35642
Q8NBJ4	33	5	GOLM1	Golgi membrane protein 1 OS=Homo sapiens GN=GOLM1 PE=1 SV=1	653.638	9.35235
Q6DN14	27	3	MCTP1	Multiple C2 and transmembrane domain-containing protein 1 OS=Homo sapiens GN=MCTP1 PE=2 SV=2	653.418	9.35186
Q9HC38	40	8	GLOD4	Glyoxalase domain-containing protein 4 OS=Homo sapiens GN=GLOD4 PE=1 SV=1	653.195	9.35137
P51649	30	11	ALDH5A1	Succinate-semialdehyde dehydrogenase_ mitochondrial OS=Homo sapiens GN=ALDH5A1 PE=1 SV=2	652.826	9.35055
O75390	52	15	CS	Citrate synthase_ mitochondrial OS=Homo sapiens GN=CS PE=1 SV=2	652.424	9.34967
Q92922	89	27	SMARCC1	SWI/SNF complex subunit SMARCC1 OS=Homo sapiens GN=SMARCC1 PE=1 SV=3	650.89	9.34627
Q9NZ56	9	2	FMN2	Formin-2 OS=Homo sapiens GN=FMN2 PE=1 SV=4	650.675	9.34579
Q5HYC2	29	6	KIAA2026	Uncharacterized protein KIAA2026 OS=Homo sapiens GN=KIAA2026 PE=2 SV=2	649.135	9.34237
Q16629	33	6	SRSF7	Serine/arginine-rich splicing factor 7 OS=Homo sapiens GN=SRSF7 PE=1 SV=1	648.723	9.34146
P49321	168	46	NASP	Nuclear autoantigenic sperm protein OS=Homo sapiens GN=NASP PE=1 SV=2	648.628	9.34125
Q13496	12	4	MTM1	Myotubularin OS=Homo sapiens GN=MTM1 PE=1 SV=2	648.493	9.34095
O00443	89	12	PIK3C2A	Phosphatidylinositol 4-phosphate 3-kinase C2 domain-containing subunit alpha OS=Homo sapiens GN=PIK3C2A PE=1 SV=2	647.95	9.33974
Q13409	40	4	DYNC1I2	Cytoplasmic dynein 1 intermediate chain 2 OS=Homo sapiens GN=DYNC1I2 PE=1 SV=3	647.169	9.338
P17812	39	14	CTPS1	CTP synthase 1 OS=Homo sapiens GN=CTPS1 PE=1 SV=2	646.544	9.3366
Q8WU90	29	6	ZC3H15	Zinc finger CCCH domain-containing protein 15 OS=Homo sapiens GN=ZC3H15 PE=1 SV=1	646.398	9.33628
Q8N108	4	2	MIER1	Mesoderm induction early response protein 1 OS=Homo sapiens GN=MIER1 PE=1 SV=2	643.287	9.32932
O96028	32	5	NSD2	Histone-lysine N-methyltransferase NSD2 OS=Homo sapiens GN=NSD2 PE=1 SV=1	643.131	9.32897
P42126	17	4	ECI1	Enoyl-CoA delta isomerase 1_ mitochondrial OS=Homo sapiens GN=ECI1 PE=1 SV=1	642.094	9.32664
Q9BRS2	12	3	RIOK1	Serine/threonine-protein kinase RIO1 OS=Homo sapiens GN=RIOK1 PE=1 SV=2	641.643	9.32563
Q9HB75	12	2	PIDD1	p53-induced death domain-containing protein 1 OS=Homo sapiens GN=PIDD1 PE=1 SV=2	640.267	9.32253
P16298	47	12	PPP3CB	Serine/threonine-protein phosphatase 2B catalytic subunit beta isoform OS=Homo sapiens GN=PPP3CB PE=1 SV=2	639.687	9.32122
P62701	48	18	RPS4X	40S ribosomal protein S4_ X isoform OS=Homo sapiens GN=RPS4X PE=1 SV=2	639.513	9.32083
O75367	30	7	H2AFY	Core histone macro-H2A.1 OS=Homo sapiens GN=H2AFY PE=1 SV=4	639.425	9.32063
P98171	18	3	ARHGAP4	Rho GTPase-activating protein 4 OS=Homo sapiens GN=ARHGAP4 PE=1 SV=2	639.219	9.32017
A6NMZ7	84	16	COL6A6	Collagen alpha-6(VI) chain OS=Homo sapiens GN=COL6A6 PE=1 SV=2	637.923	9.31724
Q9NUQ9	38	8	FAM49B	Protein FAM49B OS=Homo sapiens GN=FAM49B PE=1 SV=1	635.805	9.31244
P28072	17	4	PSMB6	Proteasome subunit beta type-6 OS=Homo sapiens GN=PSMB6 PE=1 SV=4	635.002	9.31062
Q13247	39	8	SRSF6	Serine/arginine-rich splicing factor 6 OS=Homo sapiens GN=SRSF6 PE=1 SV=2	633.842	9.30798
Q9UFH2	257	9	DNAH17	Dynein heavy chain 17_ axonemal OS=Homo sapiens GN=DNAH17 PE=1 SV=2	633.693	9.30764
Q5SZK8	51	9	FREM2	FRAS1-related extracellular matrix protein 2 OS=Homo sapiens GN=FREM2 PE=1 SV=2	631.685	9.30306
Q99698	68	16	LYST	Lysosomal-trafficking regulator OS=Homo sapiens GN=LYST PE=1 SV=3	630.81	9.30106
Q9UH03	32	4	SEPT3	Neuronal-specific septin-3 OS=Homo sapiens GN=SEPT3 PE=1 SV=3	630.376	9.30007
P26368	19	9	U2AF2	Splicing factor U2AF 65 kDa subunit OS=Homo sapiens GN=U2AF2 PE=1 SV=4	628.783	9.29642
Q86W92	108	13	PPFIBP1	Liprin-beta-1 OS=Homo sapiens GN=PPFIBP1 PE=1 SV=2	627.52	9.29352
P04259	99	18	KRT6B	Keratin_ type II cytoskeletal 6B OS=Homo sapiens GN=KRT6B PE=1 SV=5	626.012	9.29005
Q92900	54	21	UPF1	Regulator of nonsense transcripts 1 OS=Homo sapiens GN=UPF1 PE=1 SV=2	623.206	9.28356
Q13618	112	22	CUL3	Cullin-3 OS=Homo sapiens GN=CUL3 PE=1 SV=2	622.755	9.28252
Q6NSJ2	16	2	PHLDB3	Pleckstrin homology-like domain family B member 3 OS=Homo sapiens GN=PHLDB3 PE=2 SV=3	622.412	9.28173
Q5T011	59	9	SZT2	KICSTOR complex protein SZT2 OS=Homo sapiens GN=SZT2 PE=1 SV=3	620.295	9.27681
Q8IUD2	152	7	ERC1	ELKS/Rab6-interacting/CAST family member 1 OS=Homo sapiens GN=ERC1 PE=1 SV=1	619.718	9.27547
Q5VWN6	31	5	FAM208B	Protein FAM208B OS=Homo sapiens GN=FAM208B PE=1 SV=1	619.691	9.2754
Q9BSJ8	42	14	ESYT1	Extended synaptotagmin-1 OS=Homo sapiens GN=ESYT1 PE=1 SV=1	619.243	9.27436
Q9NYH9	18	4	UTP6	U3 small nucleolar RNA-associated protein 6 homolog OS=Homo sapiens GN=UTP6 PE=2 SV=2	617.581	9.27048
O75145	131	13	PPFIA3	Liprin-alpha-3 OS=Homo sapiens GN=PPFIA3 PE=1 SV=3	614.733	9.26382
P09972	78	16	ALDOC	Fructose-bisphosphate aldolase C OS=Homo sapiens GN=ALDOC PE=1 SV=2	613.611	9.26118
Q99497	50	19	PARK7	Protein/nucleic acid deglycase DJ-1 OS=Homo sapiens GN=PARK7 PE=1 SV=2	613.371	9.26062
Q86WG5	45	7	SBF2	Myotubularin-related protein 13 OS=Homo sapiens GN=SBF2 PE=1 SV=1	611.017	9.25507
O60488	19	4	ACSL4	Long-chain-fatty-acid--CoA ligase 4 OS=Homo sapiens GN=ACSL4 PE=1 SV=2	610.525	9.25391
Q86YA3	91	15	ZGRF1	Protein ZGRF1 OS=Homo sapiens GN=ZGRF1 PE=1 SV=3	609.716	9.25199
Q9NVV4	5	2	MTPAP	Poly(A) RNA polymerase_ mitochondrial OS=Homo sapiens GN=MTPAP PE=1 SV=1	608.411	9.2489
Q96J66	24	5	ABCC11	ATP-binding cassette sub-family C member 11 OS=Homo sapiens GN=ABCC11 PE=1 SV=1	607.662	9.24713
Q9UBS4	23	4	DNAJB11	DnaJ homolog subfamily B member 11 OS=Homo sapiens GN=DNAJB11 PE=1 SV=1	607.578	9.24692
Q86XX4	33	4	FRAS1	Extracellular matrix protein FRAS1 OS=Homo sapiens GN=FRAS1 PE=1 SV=2	606.581	9.24456
Q9UKV0	5	2	HDAC9	Histone deacetylase 9 OS=Homo sapiens GN=HDAC9 PE=1 SV=2	606.262	9.2438
Q07866	98	6	KLC1	Kinesin light chain 1 OS=Homo sapiens GN=KLC1 PE=1 SV=2	605.803	9.24271
H7C1P9	23	5	TTN	Titin (Fragment) OS=Homo sapiens GN=TTN PE=1 SV=1	604.633	9.23992
Q9BYP7	49	2	WNK3	Serine/threonine-protein kinase WNK3 OS=Homo sapiens GN=WNK3 PE=1 SV=3	604.147	9.23876
Q9UJF2	19	5	RASAL2	Ras GTPase-activating protein nGAP OS=Homo sapiens GN=RASAL2 PE=1 SV=2	602.32	9.23439
P28838	38	11	LAP3	Cytosol aminopeptidase OS=Homo sapiens GN=LAP3 PE=1 SV=3	602.152	9.23398
P50570	97	23	DNM2	Dynamin-2 OS=Homo sapiens GN=DNM2 PE=1 SV=2	601.543	9.23252
P48643	118	14	CCT5	T-complex protein 1 subunit epsilon OS=Homo sapiens GN=CCT5 PE=1 SV=1	600.959	9.23112
Q9H9A6	33	10	LRRC40	Leucine-rich repeat-containing protein 40 OS=Homo sapiens GN=LRRC40 PE=1 SV=1	600.295	9.22953
Q8WWI1	167	9	LMO7	LIM domain only protein 7 OS=Homo sapiens GN=LMO7 PE=1 SV=3	600.027	9.22888
Q13948	47	5	CUX1	Protein CASP OS=Homo sapiens GN=CUX1 PE=1 SV=2	599.228	9.22696
Q01955	31	4	COL4A3	Collagen alpha-3(IV) chain OS=Homo sapiens GN=COL4A3 PE=1 SV=3	599.205	9.22691
Q9BR76	17	8	CORO1B	Coronin-1B OS=Homo sapiens GN=CORO1B PE=1 SV=1	598.375	9.22491
Q5UIP0	90	17	RIF1	Telomere-associated protein RIF1 OS=Homo sapiens GN=RIF1 PE=1 SV=2	596.803	9.22111
Q9Y4L1	177	22	HYOU1	Hypoxia up-regulated protein 1 OS=Homo sapiens GN=HYOU1 PE=1 SV=1	594.12	9.21461
P17066	48	7	HSPA6	Heat shock 70 kDa protein 6 OS=Homo sapiens GN=HSPA6 PE=1 SV=2	593.789	9.21381
Q99729	49	7	HNRNPAB	Heterogeneous nuclear ribonucleoprotein A/B OS=Homo sapiens GN=HNRNPAB PE=1 SV=2	593.593	9.21333
O60506	115	27	SYNCRIP	Heterogeneous nuclear ribonucleoprotein Q OS=Homo sapiens GN=SYNCRIP PE=1 SV=2	593.175	9.21231
P27338	21	5	MAOB	Amine oxidase [flavin-containing] B OS=Homo sapiens GN=MAOB PE=1 SV=3	592.496	9.21066
Q5VUA4	26	4	ZNF318	Zinc finger protein 318 OS=Homo sapiens GN=ZNF318 PE=1 SV=2	591.969	9.20938
A4D2P6	25	3	GRID2IP	Delphilin OS=Homo sapiens GN=GRID2IP PE=3 SV=2	591.641	9.20858
A0A1X7SBU6	18	2	ADGRV1	Adhesion G protein-coupled receptor V1 (Fragment) OS=Homo sapiens GN=ADGRV1 PE=1 SV=1	591.239	9.2076
Q9H074	25	4	PAIP1	Polyadenylate-binding protein-interacting protein 1 OS=Homo sapiens GN=PAIP1 PE=1 SV=1	588.226	9.20023
Q13423	98	11	NNT	NAD(P) transhydrogenase_ mitochondrial OS=Homo sapiens GN=NNT PE=1 SV=3	588.166	9.20008
P17980	83	9	PSMC3	26S proteasome regulatory subunit 6A OS=Homo sapiens GN=PSMC3 PE=1 SV=3	586.008	9.19478
Q92626	56	12	PXDN	Peroxidasin homolog OS=Homo sapiens GN=PXDN PE=1 SV=2	584.167	9.19024
Q9H7Z3	33	5	NRDE2	Protein NRDE2 homolog OS=Homo sapiens GN=NRDE2 PE=1 SV=3	583.666	9.189
Q14203	179	13	DCTN1	Dynactin subunit 1 OS=Homo sapiens GN=DCTN1 PE=1 SV=3	583.614	9.18887
Q05481	16	2	ZNF91	Zinc finger protein 91 OS=Homo sapiens GN=ZNF91 PE=2 SV=2	583.366	9.18826
Q9UGU0	58	9	TCF20	Transcription factor 20 OS=Homo sapiens GN=TCF20 PE=1 SV=3	582.805	9.18687
Q9NQZ5	4	2	STARD7	StAR-related lipid transfer protein 7_ mitochondrial OS=Homo sapiens GN=STARD7 PE=1 SV=2	581.476	9.18357
Q5VU43	245	9	PDE4DIP	Myomegalin OS=Homo sapiens GN=PDE4DIP PE=1 SV=1	580.671	9.18158
O15033	14	2	AREL1	Apoptosis-resistant E3 ubiquitin protein ligase 1 OS=Homo sapiens GN=AREL1 PE=1 SV=3	580.293	9.18064
Q8NEZ4	153	30	KMT2C	Histone-lysine N-methyltransferase 2C OS=Homo sapiens GN=KMT2C PE=1 SV=3	579.14	9.17777
Q8TD26	131	25	CHD6	Chromodomain-helicase-DNA-binding protein 6 OS=Homo sapiens GN=CHD6 PE=1 SV=4	578.575	9.17636
Q1MSJ5	67	7	CSPP1	Centrosome and spindle pole-associated protein 1 OS=Homo sapiens GN=CSPP1 PE=1 SV=4	578.459	9.17607
Q86YS3	34	8	RAB11FIP4	Rab11 family-interacting protein 4 OS=Homo sapiens GN=RAB11FIP4 PE=1 SV=1	578.369	9.17585
O43295	45	14	SRGAP3	SLIT-ROBO Rho GTPase-activating protein 3 OS=Homo sapiens GN=SRGAP3 PE=1 SV=3	575.32	9.16822
P16949	57	18	STMN1	Stathmin OS=Homo sapiens GN=STMN1 PE=1 SV=3	574.871	9.16709
O75665	87	5	OFD1	Oral-facial-digital syndrome 1 protein OS=Homo sapiens GN=OFD1 PE=1 SV=1	573.729	9.16423
Q9BQ04	26	3	RBM4B	RNA-binding protein 4B OS=Homo sapiens GN=RBM4B PE=1 SV=1	573.096	9.16263
Q9UBC5	27	4	MYO1A	Unconventional myosin-Ia OS=Homo sapiens GN=MYO1A PE=2 SV=1	573.029	9.16246
Q99661	36	5	KIF2C	Kinesin-like protein KIF2C OS=Homo sapiens GN=KIF2C PE=1 SV=2	572.776	9.16183
Q96I24	45	8	FUBP3	Far upstream element-binding protein 3 OS=Homo sapiens GN=FUBP3 PE=1 SV=2	571.072	9.15753
Q29RF7	58	8	PDS5A	Sister chromatid cohesion protein PDS5 homolog A OS=Homo sapiens GN=PDS5A PE=1 SV=1	569.709	9.15408
A6NHL2	19	7	TUBAL3	Tubulin alpha chain-like 3 OS=Homo sapiens GN=TUBAL3 PE=1 SV=2	568.396	9.15075
Q8N998	9	2	CCDC89	Coiled-coil domain-containing protein 89 OS=Homo sapiens GN=CCDC89 PE=2 SV=1	567.865	9.1494
Q14847	40	3	LASP1	LIM and SH3 domain protein 1 OS=Homo sapiens GN=LASP1 PE=1 SV=2	566.996	9.14719
Q58FF3	76	20	HSP90B2P	Putative endoplasmin-like protein OS=Homo sapiens GN=HSP90B2P PE=5 SV=1	566.473	9.14586
Q9GZU2	49	7	PEG3	Paternally-expressed gene 3 protein OS=Homo sapiens GN=PEG3 PE=1 SV=1	565.26	9.14277
O75443	8	2	TECTA	Alpha-tectorin OS=Homo sapiens GN=TECTA PE=1 SV=3	565.155	9.1425
Q99959	16	3	PKP2	Plakophilin-2 OS=Homo sapiens GN=PKP2 PE=1 SV=2	565.028	9.14218
Q8TDY2	77	11	RB1CC1	RB1-inducible coiled-coil protein 1 OS=Homo sapiens GN=RB1CC1 PE=1 SV=3	563.881	9.13925
Q5T2N8	27	3	ATAD3C	ATPase family AAA domain-containing protein 3C OS=Homo sapiens GN=ATAD3C PE=2 SV=2	563.503	9.13828
P46937	22	2	YAP1	Transcriptional coactivator YAP1 OS=Homo sapiens GN=YAP1 PE=1 SV=2	561.209	9.13239
Q8N9V7	30	4	TOPAZ1	Testis- and ovary-specific PAZ domain-containing protein 1 OS=Homo sapiens GN=TOPAZ1 PE=2 SV=3	560.752	9.13122
P28331	82	10	NDUFS1	NADH-ubiquinone oxidoreductase 75 kDa subunit_ mitochondrial OS=Homo sapiens GN=NDUFS1 PE=1 SV=3	559.617	9.1283
Q9ULB5	10	3	CDH7	Cadherin-7 OS=Homo sapiens GN=CDH7 PE=2 SV=2	558.985	9.12667
P31323	32	14	PRKAR2B	cAMP-dependent protein kinase type II-beta regulatory subunit OS=Homo sapiens GN=PRKAR2B PE=1 SV=3	557.927	9.12393
Q9NZL9	16	3	MAT2B	Methionine adenosyltransferase 2 subunit beta OS=Homo sapiens GN=MAT2B PE=1 SV=1	556.427	9.12005
O60673	126	27	REV3L	DNA polymerase zeta catalytic subunit OS=Homo sapiens GN=REV3L PE=1 SV=2	556.107	9.11922
Q7KZ85	66	19	SUPT6H	Transcription elongation factor SPT6 OS=Homo sapiens GN=SUPT6H PE=1 SV=2	555.887	9.11865
O95886	11	5	DLGAP3	Disks large-associated protein 3 OS=Homo sapiens GN=DLGAP3 PE=1 SV=3	555.747	9.11828
Q8IVV2	93	3	LOXHD1	Lipoxygenase homology domain-containing protein 1 OS=Homo sapiens GN=LOXHD1 PE=2 SV=3	554.991	9.11632
Q9NY61	8	2	AATF	Protein AATF OS=Homo sapiens GN=AATF PE=1 SV=1	551.112	9.1062
Q5VZ66	25	3	JAKMIP3	Janus kinase and microtubule-interacting protein 3 OS=Homo sapiens GN=JAKMIP3 PE=2 SV=2	551.094	9.10616
Q9BT78	64	7	COPS4	COP9 signalosome complex subunit 4 OS=Homo sapiens GN=COPS4 PE=1 SV=1	551.083	9.10613
Q96QR8	10	3	PURB	Transcriptional activator protein Pur-beta OS=Homo sapiens GN=PURB PE=1 SV=3	550.478	9.10454
Q8WXF7	33	7	ATL1	Atlastin-1 OS=Homo sapiens GN=ATL1 PE=1 SV=1	549.602	9.10224
Q12931	139	24	TRAP1	Heat shock protein 75 kDa_ mitochondrial OS=Homo sapiens GN=TRAP1 PE=1 SV=3	547.786	9.09747
P33176	159	44	KIF5B	Kinesin-1 heavy chain OS=Homo sapiens GN=KIF5B PE=1 SV=1	546.316	9.09359
O14828	16	7	SCAMP3	Secretory carrier-associated membrane protein 3 OS=Homo sapiens GN=SCAMP3 PE=1 SV=3	545.093	9.09036
A0A1B0GTZ1	11	3	SYT14	Synaptotagmin-14 OS=Homo sapiens GN=SYT14 PE=4 SV=1	544.013	9.0875
P98175	48	6	RBM10	RNA-binding protein 10 OS=Homo sapiens GN=RBM10 PE=1 SV=3	543.227	9.08541
O14776	97	10	TCERG1	Transcription elongation regulator 1 OS=Homo sapiens GN=TCERG1 PE=1 SV=2	543.188	9.08531
P02768	134	36	ALB	Serum albumin OS=Homo sapiens GN=ALB PE=1 SV=2	542.609	9.08377
A0A1B0GTS2	26	6	OBSCN	Obscurin (Fragment) OS=Homo sapiens GN=OBSCN PE=1 SV=1	542.485	9.08344
O14531	80	14	DPYSL4	Dihydropyrimidinase-related protein 4 OS=Homo sapiens GN=DPYSL4 PE=1 SV=2	542.123	9.08248
P31943	97	25	HNRNPH1	Heterogeneous nuclear ribonucleoprotein H OS=Homo sapiens GN=HNRNPH1 PE=1 SV=4	541.902	9.08189
P62195	86	14	PSMC5	26S proteasome regulatory subunit 8 OS=Homo sapiens GN=PSMC5 PE=1 SV=1	540.794	9.07893
Q7Z494	39	5	NPHP3	Nephrocystin-3 OS=Homo sapiens GN=NPHP3 PE=1 SV=1	540.497	9.07814
O95782	68	21	AP2A1	AP-2 complex subunit alpha-1 OS=Homo sapiens GN=AP2A1 PE=1 SV=3	540.233	9.07744
O15455	6	2	TLR3	Toll-like receptor 3 OS=Homo sapiens GN=TLR3 PE=1 SV=1	536.616	9.06775
Q9NYI0	37	2	PSD3	PH and SEC7 domain-containing protein 3 OS=Homo sapiens GN=PSD3 PE=1 SV=2	536.351	9.06703
Q9P0V3	19	4	SH3BP4	SH3 domain-binding protein 4 OS=Homo sapiens GN=SH3BP4 PE=1 SV=1	536.166	9.06654
Q2TAY7	24	7	SMU1	WD40 repeat-containing protein SMU1 OS=Homo sapiens GN=SMU1 PE=1 SV=2	534.879	9.06307
Q9NRY4	37	5	ARHGAP35	Rho GTPase-activating protein 35 OS=Homo sapiens GN=ARHGAP35 PE=1 SV=3	534.794	9.06284
P09874	153	53	PARP1	Poly [ADP-ribose] polymerase 1 OS=Homo sapiens GN=PARP1 PE=1 SV=4	534.436	9.06187
Q96JM3	39	7	CHAMP1	Chromosome alignment-maintaining phosphoprotein 1 OS=Homo sapiens GN=CHAMP1 PE=1 SV=2	534.373	9.0617
Q9NTJ3	131	6	SMC4	Structural maintenance of chromosomes protein 4 OS=Homo sapiens GN=SMC4 PE=1 SV=2	534.364	9.06168
P00492	12	5	HPRT1	Hypoxanthine-guanine phosphoribosyltransferase OS=Homo sapiens GN=HPRT1 PE=1 SV=2	532.678	9.05712
Q9NUA8	23	2	ZBTB40	Zinc finger and BTB domain-containing protein 40 OS=Homo sapiens GN=ZBTB40 PE=1 SV=4	531.756	9.05462
Q9Y3P9	46	8	RABGAP1	Rab GTPase-activating protein 1 OS=Homo sapiens GN=RABGAP1 PE=1 SV=3	531.36	9.05355
P33778	49	16	HIST1H2BB	Histone H2B type 1-B OS=Homo sapiens GN=HIST1H2BB PE=1 SV=2	530.146	9.05024
P20337	15	3	RAB3B	Ras-related protein Rab-3B OS=Homo sapiens GN=RAB3B PE=1 SV=2	529.373	9.04814
O00291	45	3	HIP1	Huntingtin-interacting protein 1 OS=Homo sapiens GN=HIP1 PE=1 SV=5	528.413	9.04552
O00562	21	3	PITPNM1	Membrane-associated phosphatidylinositol transfer protein 1 OS=Homo sapiens GN=PITPNM1 PE=1 SV=4	527.737	9.04368
Q96RY7	23	5	IFT140	Intraflagellar transport protein 140 homolog OS=Homo sapiens GN=IFT140 PE=1 SV=1	527.688	9.04354
Q8NFW1	49	13	COL22A1	Collagen alpha-1(XXII) chain OS=Homo sapiens GN=COL22A1 PE=2 SV=2	527.375	9.04269
Q06323	31	11	PSME1	Proteasome activator complex subunit 1 OS=Homo sapiens GN=PSME1 PE=1 SV=1	527.208	9.04223
Q9H2Y7	67	8	ZNF106	Zinc finger protein 106 OS=Homo sapiens GN=ZNF106 PE=1 SV=1	526.617	9.04061
F5GXQ8	64	5	SYNE1	Nesprin-1 OS=Homo sapiens GN=SYNE1 PE=1 SV=1	526.371	9.03994
P14868	91	19	DARS	Aspartate--tRNA ligase_ cytoplasmic OS=Homo sapiens GN=DARS PE=1 SV=2	525.762	9.03827
Q9NVA2	76	4	SEPT11	Septin-11 OS=Homo sapiens GN=SEPT11 PE=1 SV=3	525.049	9.03631
Q12905	53	22	ILF2	Interleukin enhancer-binding factor 2 OS=Homo sapiens GN=ILF2 PE=1 SV=2	524.444	9.03465
O00267	84	13	SUPT5H	Transcription elongation factor SPT5 OS=Homo sapiens GN=SUPT5H PE=1 SV=1	522.449	9.02915
Q9Y6D6	113	5	ARFGEF1	Brefeldin A-inhibited guanine nucleotide-exchange protein 1 OS=Homo sapiens GN=ARFGEF1 PE=1 SV=2	522.283	9.02869
P35611	77	6	ADD1	Alpha-adducin OS=Homo sapiens GN=ADD1 PE=1 SV=2	521.441	9.02636
O75694	59	2	NUP155	Nuclear pore complex protein Nup155 OS=Homo sapiens GN=NUP155 PE=1 SV=1	521.006	9.02516
Q92530	5	2	PSMF1	Proteasome inhibitor PI31 subunit OS=Homo sapiens GN=PSMF1 PE=1 SV=2	520.674	9.02424
P53675	127	9	CLTCL1	Clathrin heavy chain 2 OS=Homo sapiens GN=CLTCL1 PE=1 SV=2	519.458	9.02086
Q9Y265	71	19	RUVBL1	RuvB-like 1 OS=Homo sapiens GN=RUVBL1 PE=1 SV=1	519.19	9.02012
A4UGR9	288	49	XIRP2	Xin actin-binding repeat-containing protein 2 OS=Homo sapiens GN=XIRP2 PE=1 SV=2	518.961	9.01948
Q9Y263	52	5	PLAA	Phospholipase A-2-activating protein OS=Homo sapiens GN=PLAA PE=1 SV=2	518.799	9.01903
P49796	49	4	RGS3	Regulator of G-protein signaling 3 OS=Homo sapiens GN=RGS3 PE=1 SV=2	517.375	9.01507
O14647	87	11	CHD2	Chromodomain-helicase-DNA-binding protein 2 OS=Homo sapiens GN=CHD2 PE=1 SV=2	516.745	9.01331
P49750	174	12	YLPM1	YLP motif-containing protein 1 OS=Homo sapiens GN=YLPM1 PE=1 SV=3	516.621	9.01296
P00367	88	24	GLUD1	Glutamate dehydrogenase 1_ mitochondrial OS=Homo sapiens GN=GLUD1 PE=1 SV=2	515.974	9.01115
Q5VIY5	17	3	ZNF468	Zinc finger protein 468 OS=Homo sapiens GN=ZNF468 PE=2 SV=1	515.608	9.01013
P02751	108	36	FN1	Fibronectin OS=Homo sapiens GN=FN1 PE=1 SV=4	514.547	9.00716
Q14166	43	18	TTLL12	Tubulin--tyrosine ligase-like protein 12 OS=Homo sapiens GN=TTLL12 PE=1 SV=2	514.21	9.00622
Q9BQS8	55	5	FYCO1	FYVE and coiled-coil domain-containing protein 1 OS=Homo sapiens GN=FYCO1 PE=1 SV=3	513.98	9.00557
O43681	24	4	ASNA1	ATPase ASNA1 OS=Homo sapiens GN=ASNA1 PE=1 SV=2	512.924	9.0026
Q13449	22	2	LSAMP	Limbic system-associated membrane protein OS=Homo sapiens GN=LSAMP PE=1 SV=2	512.87	9.00245
P06756	16	5	ITGAV	Integrin alpha-V OS=Homo sapiens GN=ITGAV PE=1 SV=2	511.218	8.99779
P11498	65	10	PC	Pyruvate carboxylase_ mitochondrial OS=Homo sapiens GN=PC PE=1 SV=2	510.34	8.99531
P0DJD1	142	5	RGPD2	RANBP2-like and GRIP domain-containing protein 2 OS=Homo sapiens GN=RGPD2 PE=2 SV=1	510.158	8.9948
Q13510	25	4	ASAH1	Acid ceramidase OS=Homo sapiens GN=ASAH1 PE=1 SV=5	509.77	8.9937
Q6ZU15	5	2	SEPT14	Septin-14 OS=Homo sapiens GN=SEPT14 PE=1 SV=2	508.987	8.99149
Q5VZ46	19	5	KIAA1614	Uncharacterized protein KIAA1614 OS=Homo sapiens GN=KIAA1614 PE=2 SV=3	507.294	8.98668
P12004	52	24	PCNA	Proliferating cell nuclear antigen OS=Homo sapiens GN=PCNA PE=1 SV=1	507.237	8.98651
P11177	44	13	PDHB	Pyruvate dehydrogenase E1 component subunit beta_ mitochondrial OS=Homo sapiens GN=PDHB PE=1 SV=3	506.793	8.98525
Q8WYP5	28	5	AHCTF1	Protein ELYS OS=Homo sapiens GN=AHCTF1 PE=1 SV=3	505.804	8.98244
Q7L0Y3	7	2	TRMT10C	Mitochondrial ribonuclease P protein 1 OS=Homo sapiens GN=TRMT10C PE=1 SV=2	505.725	8.98221
P09493	99	14	TPM1	Tropomyosin alpha-1 chain OS=Homo sapiens GN=TPM1 PE=1 SV=2	503.935	8.97709
Q8WYL5	27	3	SSH1	Protein phosphatase Slingshot homolog 1 OS=Homo sapiens GN=SSH1 PE=1 SV=2	503.776	8.97664
Q9UKV3	162	15	ACIN1	Apoptotic chromatin condensation inducer in the nucleus OS=Homo sapiens GN=ACIN1 PE=1 SV=2	503.621	8.97619
P56747	9	4	CLDN6	Claudin-6 OS=Homo sapiens GN=CLDN6 PE=1 SV=2	502.92	8.97419
Q96RT6	37	6	CTAGE1	cTAGE family member 2 OS=Homo sapiens GN=CTAGE1 PE=1 SV=2	501.211	8.96927
Q17RW2	11	4	COL24A1	Collagen alpha-1(XXIV) chain OS=Homo sapiens GN=COL24A1 PE=1 SV=2	501.127	8.96903
P30041	62	32	PRDX6	Peroxiredoxin-6 OS=Homo sapiens GN=PRDX6 PE=1 SV=3	500.396	8.96693
Q9H694	18	4	BICC1	Protein bicaudal C homolog 1 OS=Homo sapiens GN=BICC1 PE=1 SV=2	499.418	8.9641
Q5VZL5	33	4	ZMYM4	Zinc finger MYM-type protein 4 OS=Homo sapiens GN=ZMYM4 PE=1 SV=1	499.391	8.96403
Q9NVI1	38	2	FANCI	Fanconi anemia group I protein OS=Homo sapiens GN=FANCI PE=1 SV=4	498.602	8.96174
P84157	5	2	MXRA7	Matrix-remodeling-associated protein 7 OS=Homo sapiens GN=MXRA7 PE=1 SV=1	497.895	8.9597
Q9NP08	3	2	HMX1	Homeobox protein HMX1 OS=Homo sapiens GN=HMX1 PE=2 SV=2	497.504	8.95856
Q15303	16	2	ERBB4	Receptor tyrosine-protein kinase erbB-4 OS=Homo sapiens GN=ERBB4 PE=1 SV=1	495.789	8.95358
Q92620	45	5	DHX38	Pre-mRNA-splicing factor ATP-dependent RNA helicase PRP16 OS=Homo sapiens GN=DHX38 PE=1 SV=2	495.074	8.9515
P52788	24	6	SMS	Spermine synthase OS=Homo sapiens GN=SMS PE=1 SV=2	494.519	8.94988
P47756	45	7	CAPZB	F-actin-capping protein subunit beta OS=Homo sapiens GN=CAPZB PE=1 SV=4	493.572	8.94712
Q96PE2	18	4	ARHGEF17	Rho guanine nucleotide exchange factor 17 OS=Homo sapiens GN=ARHGEF17 PE=1 SV=1	493.369	8.94652
P62166	9	3	NCS1	Neuronal calcium sensor 1 OS=Homo sapiens GN=NCS1 PE=1 SV=2	493.249	8.94617
P15880	53	12	RPS2	40S ribosomal protein S2 OS=Homo sapiens GN=RPS2 PE=1 SV=2	490.952	8.93944
P61764	144	28	STXBP1	Syntaxin-binding protein 1 OS=Homo sapiens GN=STXBP1 PE=1 SV=1	486.931	8.92757
O43347	30	8	MSI1	RNA-binding protein Musashi homolog 1 OS=Homo sapiens GN=MSI1 PE=1 SV=1	485.969	8.92472
Q6ZR08	160	6	DNAH12	Dynein heavy chain 12_ axonemal OS=Homo sapiens GN=DNAH12 PE=2 SV=2	485.712	8.92396
Q13310	65	5	PABPC4	Polyadenylate-binding protein 4 OS=Homo sapiens GN=PABPC4 PE=1 SV=1	483.665	8.91787
Q9HCE3	22	5	ZNF532	Zinc finger protein 532 OS=Homo sapiens GN=ZNF532 PE=1 SV=2	483.406	8.91709
Q9Y623	158	15	MYH4	Myosin-4 OS=Homo sapiens GN=MYH4 PE=2 SV=2	483.286	8.91673
A6H8Y1	136	6	BDP1	Transcription factor TFIIIB component B'' homolog OS=Homo sapiens GN=BDP1 PE=1 SV=3	482.98	8.91582
P30153	82	9	PPP2R1A	Serine/threonine-protein phosphatase 2A 65 kDa regulatory subunit A alpha isoform OS=Homo sapiens GN=PPP2R1A PE=1 SV=4	482.737	8.91509
Q96QB1	56	8	DLC1	Rho GTPase-activating protein 7 OS=Homo sapiens GN=DLC1 PE=1 SV=4	481.426	8.91117
Q15008	58	18	PSMD6	26S proteasome non-ATPase regulatory subunit 6 OS=Homo sapiens GN=PSMD6 PE=1 SV=1	481.255	8.91066
P22102	87	24	GART	Trifunctional purine biosynthetic protein adenosine-3 OS=Homo sapiens GN=GART PE=1 SV=1	480.178	8.90742
P00918	14	6	CA2	Carbonic anhydrase 2 OS=Homo sapiens GN=CA2 PE=1 SV=2	480.148	8.90734
Q96LI6	4	2	HSFY1	Heat shock transcription factor_ Y-linked OS=Homo sapiens GN=HSFY1 PE=1 SV=1	479.672	8.90591
Q9Y467	22	5	SALL2	Sal-like protein 2 OS=Homo sapiens GN=SALL2 PE=1 SV=4	479.343	8.90491
Q9Y2X3	31	10	NOP58	Nucleolar protein 58 OS=Homo sapiens GN=NOP58 PE=1 SV=1	478.731	8.90307
Q9Y2T3	30	8	GDA	Guanine deaminase OS=Homo sapiens GN=GDA PE=1 SV=1	478.179	8.90141
Q9UL68	20	6	MYT1L	Myelin transcription factor 1-like protein OS=Homo sapiens GN=MYT1L PE=2 SV=3	476.941	8.89767
Q58EX7	22	6	PLEKHG4	Puratrophin-1 OS=Homo sapiens GN=PLEKHG4 PE=1 SV=1	476.71	8.89697
P42167	40	2	TMPO	Lamina-associated polypeptide 2_ isoforms beta/gamma OS=Homo sapiens GN=TMPO PE=1 SV=2	472.915	8.88544
P26358	85	15	DNMT1	DNA (cytosine-5)-methyltransferase 1 OS=Homo sapiens GN=DNMT1 PE=1 SV=2	472.682	8.88473
O43747	35	17	AP1G1	AP-1 complex subunit gamma-1 OS=Homo sapiens GN=AP1G1 PE=1 SV=5	472.629	8.88457
Q9UHN6	56	5	TMEM2	Cell surface hyaluronidase OS=Homo sapiens GN=TMEM2 PE=1 SV=1	472.138	8.88306
Q96Q89	91	15	KIF20B	Kinesin-like protein KIF20B OS=Homo sapiens GN=KIF20B PE=1 SV=3	471.715	8.88177
P13521	10	5	SCG2	Secretogranin-2 OS=Homo sapiens GN=SCG2 PE=1 SV=2	471.554	8.88128
Q9NR09	101	20	BIRC6	Baculoviral IAP repeat-containing protein 6 OS=Homo sapiens GN=BIRC6 PE=1 SV=2	471.068	8.87979
Q13547	27	2	HDAC1	Histone deacetylase 1 OS=Homo sapiens GN=HDAC1 PE=1 SV=1	471.048	8.87973
Q9UGV2	9	2	NDRG3	Protein NDRG3 OS=Homo sapiens GN=NDRG3 PE=1 SV=2	470.179	8.87707
P15259	42	13	PGAM2	Phosphoglycerate mutase 2 OS=Homo sapiens GN=PGAM2 PE=1 SV=3	470.107	8.87684
Q9UPV0	32	8	CEP164	Centrosomal protein of 164 kDa OS=Homo sapiens GN=CEP164 PE=1 SV=3	466.333	8.86522
A6NI56	25	3	CCDC154	Coiled-coil domain-containing protein 154 OS=Homo sapiens GN=CCDC154 PE=2 SV=4	466.018	8.86424
Q9UBV2	19	2	SEL1L	Protein sel-1 homolog 1 OS=Homo sapiens GN=SEL1L PE=1 SV=3	465.317	8.86207
Q9P2K5	84	8	MYEF2	Myelin expression factor 2 OS=Homo sapiens GN=MYEF2 PE=1 SV=3	464.436	8.85934
Q6TFL3	101	22	CCDC171	Coiled-coil domain-containing protein 171 OS=Homo sapiens GN=CCDC171 PE=2 SV=1	464.032	8.85808
P35913	30	6	PDE6B	Rod cGMP-specific 3'_5'-cyclic phosphodiesterase subunit beta OS=Homo sapiens GN=PDE6B PE=1 SV=2	463.369	8.85602
Q16649	14	6	NFIL3	Nuclear factor interleukin-3-regulated protein OS=Homo sapiens GN=NFIL3 PE=1 SV=2	463.345	8.85594
Q9UH99	24	2	SUN2	SUN domain-containing protein 2 OS=Homo sapiens GN=SUN2 PE=1 SV=3	463.226	8.85557
Q6GQQ9	35	4	OTUD7B	OTU domain-containing protein 7B OS=Homo sapiens GN=OTUD7B PE=1 SV=1	461.666	8.85071
O94874	19	4	UFL1	E3 UFM1-protein ligase 1 OS=Homo sapiens GN=UFL1 PE=1 SV=2	459.864	8.84506
A0A0U1RR07	140	24	SYTL2	Synaptotagmin-like protein 2 OS=Homo sapiens GN=SYTL2 PE=1 SV=1	458.503	8.84079
Q9NUJ1	16	3	ABHD10	Mycophenolic acid acyl-glucuronide esterase_ mitochondrial OS=Homo sapiens GN=ABHD10 PE=1 SV=1	458.404	8.84048
Q15059	41	9	BRD3	Bromodomain-containing protein 3 OS=Homo sapiens GN=BRD3 PE=1 SV=1	457.648	8.8381
Q9BVP2	24	8	GNL3	Guanine nucleotide-binding protein-like 3 OS=Homo sapiens GN=GNL3 PE=1 SV=2	457.1	8.83637
Q96AJ9	5	2	VTI1A	Vesicle transport through interaction with t-SNAREs homolog 1A OS=Homo sapiens GN=VTI1A PE=1 SV=2	456.083	8.83315
P33991	104	30	MCM4	DNA replication licensing factor MCM4 OS=Homo sapiens GN=MCM4 PE=1 SV=5	455.709	8.83197
P52209	83	28	PGD	6-phosphogluconate dehydrogenase_ decarboxylating OS=Homo sapiens GN=PGD PE=1 SV=3	455.318	8.83073
Q14028	29	8	CNGB1	Cyclic nucleotide-gated cation channel beta-1 OS=Homo sapiens GN=CNGB1 PE=1 SV=2	454.985	8.82967
Q8IX03	42	2	WWC1	Protein KIBRA OS=Homo sapiens GN=WWC1 PE=1 SV=1	454.457	8.828
P08243	42	10	ASNS	Asparagine synthetase [glutamine-hydrolyzing] OS=Homo sapiens GN=ASNS PE=1 SV=4	453.928	8.82632
Q9UNW9	29	8	NOVA2	RNA-binding protein Nova-2 OS=Homo sapiens GN=NOVA2 PE=1 SV=1	453.54	8.82509
O75781	31	5	PALM	Paralemmin-1 OS=Homo sapiens GN=PALM PE=1 SV=2	452.425	8.82153
A6NHR9	75	9	SMCHD1	Structural maintenance of chromosomes flexible hinge domain-containing protein 1 OS=Homo sapiens GN=SMCHD1 PE=1 SV=2	452.308	8.82116
P35052	47	7	GPC1	Glypican-1 OS=Homo sapiens GN=GPC1 PE=1 SV=2	451.66	8.81909
Q6ZU80	103	8	CEP128	Centrosomal protein of 128 kDa OS=Homo sapiens GN=CEP128 PE=1 SV=2	451.589	8.81887
Q0VFZ6	31	6	CCDC173	Coiled-coil domain-containing protein 173 OS=Homo sapiens GN=CCDC173 PE=2 SV=2	451.549	8.81874
P31327	50	11	CPS1	Carbamoyl-phosphate synthase [ammonia]_ mitochondrial OS=Homo sapiens GN=CPS1 PE=1 SV=2	451.123	8.81738
Q9NYQ8	25	6	FAT2	Protocadherin Fat 2 OS=Homo sapiens GN=FAT2 PE=1 SV=2	450.713	8.81607
P19105	27	4	MYL12A	Myosin regulatory light chain 12A OS=Homo sapiens GN=MYL12A PE=1 SV=2	450.701	8.81603
Q9NQX3	27	2	GPHN	Gephyrin OS=Homo sapiens GN=GPHN PE=1 SV=1	450.201	8.81442
A6ND36	4	2	FAM83G	Protein FAM83G OS=Homo sapiens GN=FAM83G PE=1 SV=2	450.079	8.81403
Q15843	8	2	NEDD8	NEDD8 OS=Homo sapiens GN=NEDD8 PE=1 SV=1	449.995	8.81376
Q659C4	29	6	LARP1B	La-related protein 1B OS=Homo sapiens GN=LARP1B PE=1 SV=2	449.165	8.8111
Q5T1B0	36	2	AXDND1	Axonemal dynein light chain domain-containing protein 1 OS=Homo sapiens GN=AXDND1 PE=2 SV=1	448.464	8.80885
Q02779	17	3	MAP3K10	Mitogen-activated protein kinase kinase kinase 10 OS=Homo sapiens GN=MAP3K10 PE=1 SV=3	448.361	8.80852
Q99615	47	4	DNAJC7	DnaJ homolog subfamily C member 7 OS=Homo sapiens GN=DNAJC7 PE=1 SV=2	448.129	8.80777
Q14517	105	5	FAT1	Protocadherin Fat 1 OS=Homo sapiens GN=FAT1 PE=1 SV=2	447.683	8.80633
A2RUB6	20	2	CCDC66	Coiled-coil domain-containing protein 66 OS=Homo sapiens GN=CCDC66 PE=1 SV=4	447.211	8.80481
Q96JB1	237	8	DNAH8	Dynein heavy chain 8_ axonemal OS=Homo sapiens GN=DNAH8 PE=1 SV=2	446.973	8.80404
Q00537	28	3	CDK17	Cyclin-dependent kinase 17 OS=Homo sapiens GN=CDK17 PE=1 SV=2	446.364	8.80208
Q9BZ23	24	2	PANK2	Pantothenate kinase 2_ mitochondrial OS=Homo sapiens GN=PANK2 PE=1 SV=3	446.347	8.80202
Q8NB90	22	3	SPATA5	Spermatogenesis-associated protein 5 OS=Homo sapiens GN=SPATA5 PE=1 SV=3	445.603	8.79961
P0CG39	117	11	POTEJ	POTE ankyrin domain family member J OS=Homo sapiens GN=POTEJ PE=3 SV=1	445.323	8.79871
P62191	72	21	PSMC1	26S proteasome regulatory subunit 4 OS=Homo sapiens GN=PSMC1 PE=1 SV=1	444.928	8.79743
Q04695	54	3	KRT17	Keratin_ type I cytoskeletal 17 OS=Homo sapiens GN=KRT17 PE=1 SV=2	444.634	8.79647
P42224	65	5	STAT1	Signal transducer and activator of transcription 1-alpha/beta OS=Homo sapiens GN=STAT1 PE=1 SV=2	443.664	8.79332
Q9H706	13	2	GAREM1	GRB2-associated and regulator of MAPK protein 1 OS=Homo sapiens GN=GAREM1 PE=1 SV=2	443.336	8.79226
Q9UKY7	20	4	CDV3	Protein CDV3 homolog OS=Homo sapiens GN=CDV3 PE=1 SV=1	440.585	8.78328
Q9BZZ5	84	14	API5	Apoptosis inhibitor 5 OS=Homo sapiens GN=API5 PE=1 SV=3	439.965	8.78125
Q8NDV7	60	10	TNRC6A	Trinucleotide repeat-containing gene 6A protein OS=Homo sapiens GN=TNRC6A PE=1 SV=2	439.5	8.77972
P23468	82	4	PTPRD	Receptor-type tyrosine-protein phosphatase delta OS=Homo sapiens GN=PTPRD PE=1 SV=2	438.636	8.77688
Q9Y5F7	33	5	PCDHGC4	Protocadherin gamma-C4 OS=Homo sapiens GN=PCDHGC4 PE=2 SV=1	438.417	8.77616
Q9Y6X0	23	4	SETBP1	SET-binding protein OS=Homo sapiens GN=SETBP1 PE=1 SV=3	437.955	8.77464
P67936	48	5	TPM4	Tropomyosin alpha-4 chain OS=Homo sapiens GN=TPM4 PE=1 SV=3	437.855	8.77431
Q96SK3	14	3	ZNF607	Zinc finger protein 607 OS=Homo sapiens GN=ZNF607 PE=1 SV=3	437.294	8.77246
Q96JM4	48	13	LRRIQ1	Leucine-rich repeat and IQ domain-containing protein 1 OS=Homo sapiens GN=LRRIQ1 PE=2 SV=3	437.236	8.77227
Q9Y4I1	221	6	MYO5A	Unconventional myosin-Va OS=Homo sapiens GN=MYO5A PE=1 SV=2	436.403	8.76952
Q9H611	13	2	PIF1	ATP-dependent DNA helicase PIF1 OS=Homo sapiens GN=PIF1 PE=1 SV=2	436.23	8.76895
Q96SB8	50	9	SMC6	Structural maintenance of chromosomes protein 6 OS=Homo sapiens GN=SMC6 PE=1 SV=2	435.924	8.76793
O14908	26	7	GIPC1	PDZ domain-containing protein GIPC1 OS=Homo sapiens GN=GIPC1 PE=1 SV=2	435.419	8.76626
O14744	48	8	PRMT5	Protein arginine N-methyltransferase 5 OS=Homo sapiens GN=PRMT5 PE=1 SV=4	435.376	8.76612
P78332	89	7	RBM6	RNA-binding protein 6 OS=Homo sapiens GN=RBM6 PE=1 SV=5	434.439	8.76301
P43121	17	2	MCAM	Cell surface glycoprotein MUC18 OS=Homo sapiens GN=MCAM PE=1 SV=2	434.369	8.76278
P52948	94	9	NUP98	Nuclear pore complex protein Nup98-Nup96 OS=Homo sapiens GN=NUP98 PE=1 SV=4	434.284	8.7625
Q9UKX2	130	7	MYH2	Myosin-2 OS=Homo sapiens GN=MYH2 PE=1 SV=1	433.896	8.7612
Q9NX46	21	5	ADPRHL2	Poly(ADP-ribose) glycohydrolase ARH3 OS=Homo sapiens GN=ADPRHL2 PE=1 SV=1	432.895	8.75787
Q13347	35	9	EIF3I	Eukaryotic translation initiation factor 3 subunit I OS=Homo sapiens GN=EIF3I PE=1 SV=1	431.408	8.75291
O94875	24	2	SORBS2	Sorbin and SH3 domain-containing protein 2 OS=Homo sapiens GN=SORBS2 PE=1 SV=3	429.526	8.7466
Q9NX14	10	5	NDUFB11	NADH dehydrogenase [ubiquinone] 1 beta subcomplex subunit 11_ mitochondrial OS=Homo sapiens GN=NDUFB11 PE=1 SV=1	429.518	8.74658
O95865	36	6	DDAH2	N(G)_N(G)-dimethylarginine dimethylaminohydrolase 2 OS=Homo sapiens GN=DDAH2 PE=1 SV=1	428.77	8.74406
P40938	13	3	RFC3	Replication factor C subunit 3 OS=Homo sapiens GN=RFC3 PE=1 SV=2	428.709	8.74386
O43795	72	4	MYO1B	Unconventional myosin-Ib OS=Homo sapiens GN=MYO1B PE=1 SV=3	427.749	8.74062
P00387	33	12	CYB5R3	NADH-cytochrome b5 reductase 3 OS=Homo sapiens GN=CYB5R3 PE=1 SV=3	427.643	8.74026
O00410	91	21	IPO5	Importin-5 OS=Homo sapiens GN=IPO5 PE=1 SV=4	427.47	8.73968
P61604	9	2	HSPE1	10 kDa heat shock protein_ mitochondrial OS=Homo sapiens GN=HSPE1 PE=1 SV=2	426.415	8.73611
Q8NG31	100	9	KNL1	Kinetochore scaffold 1 OS=Homo sapiens GN=KNL1 PE=1 SV=3	425.716	8.73375
Q00796	23	2	SORD	Sorbitol dehydrogenase OS=Homo sapiens GN=SORD PE=1 SV=4	424.156	8.72845
Q8IVE3	38	10	PLEKHH2	Pleckstrin homology domain-containing family H member 2 OS=Homo sapiens GN=PLEKHH2 PE=1 SV=2	424.025	8.72801
Q9NUU7	62	7	DDX19A	ATP-dependent RNA helicase DDX19A OS=Homo sapiens GN=DDX19A PE=1 SV=1	423.403	8.72589
P13489	23	2	RNH1	Ribonuclease inhibitor OS=Homo sapiens GN=RNH1 PE=1 SV=2	423.087	8.72481
Q13367	64	11	AP3B2	AP-3 complex subunit beta-2 OS=Homo sapiens GN=AP3B2 PE=1 SV=2	422.657	8.72334
O14827	15	3	RASGRF2	Ras-specific guanine nucleotide-releasing factor 2 OS=Homo sapiens GN=RASGRF2 PE=1 SV=2	422.292	8.7221
Q7Z4W1	24	6	DCXR	L-xylulose reductase OS=Homo sapiens GN=DCXR PE=1 SV=2	422.067	8.72133
P08779	67	6	KRT16	Keratin_ type I cytoskeletal 16 OS=Homo sapiens GN=KRT16 PE=1 SV=4	421.706	8.72009
Q8NEV4	43	7	MYO3A	Myosin-IIIa OS=Homo sapiens GN=MYO3A PE=1 SV=2	420.375	8.71553
Q562F6	47	9	SGO2	Shugoshin 2 OS=Homo sapiens GN=SGO2 PE=1 SV=2	419.679	8.71314
Q96M83	119	13	CCDC7	Coiled-coil domain-containing protein 7 OS=Homo sapiens GN=CCDC7 PE=2 SV=3	419.511	8.71256
Q13127	18	3	REST	RE1-silencing transcription factor OS=Homo sapiens GN=REST PE=1 SV=3	419.426	8.71227
P21579	71	13	SYT1	Synaptotagmin-1 OS=Homo sapiens GN=SYT1 PE=1 SV=1	419.093	8.71113
Q9NQW6	36	5	ANLN	Anillin OS=Homo sapiens GN=ANLN PE=1 SV=2	419.07	8.71105
Q5T890	97	9	ERCC6L2	DNA excision repair protein ERCC-6-like 2 OS=Homo sapiens GN=ERCC6L2 PE=1 SV=2	418.733	8.70989
A5D8V7	12	2	CCDC151	Coiled-coil domain-containing protein 151 OS=Homo sapiens GN=CCDC151 PE=1 SV=1	418.609	8.70946
B2RTY4	192	6	MYO9A	Unconventional myosin-IXa OS=Homo sapiens GN=MYO9A PE=1 SV=2	417.712	8.70636
P02792	20	9	FTL	Ferritin light chain OS=Homo sapiens GN=FTL PE=1 SV=2	416.943	8.70371
Q9BVN2	11	2	RUSC1	RUN and SH3 domain-containing protein 1 OS=Homo sapiens GN=RUSC1 PE=1 SV=3	415.442	8.6985
Q8NB25	178	4	FAM184A	Protein FAM184A OS=Homo sapiens GN=FAM184A PE=2 SV=3	415.117	8.69738
Q02818	68	13	NUCB1	Nucleobindin-1 OS=Homo sapiens GN=NUCB1 PE=1 SV=4	413.725	8.69253
P27695	30	2	APEX1	DNA-(apurinic or apyrimidinic site) lyase OS=Homo sapiens GN=APEX1 PE=1 SV=2	413.688	8.6924
P63000	6	3	RAC1	Ras-related C3 botulinum toxin substrate 1 OS=Homo sapiens GN=RAC1 PE=1 SV=1	413.653	8.69228
O60292	53	9	SIPA1L3	Signal-induced proliferation-associated 1-like protein 3 OS=Homo sapiens GN=SIPA1L3 PE=1 SV=3	413.608	8.69212
Q9ULV0	116	24	MYO5B	Unconventional myosin-Vb OS=Homo sapiens GN=MYO5B PE=1 SV=3	412.419	8.68797
O60502	61	20	MGEA5	Protein O-GlcNAcase OS=Homo sapiens GN=MGEA5 PE=1 SV=2	412.065	8.68673
P49720	16	3	PSMB3	Proteasome subunit beta type-3 OS=Homo sapiens GN=PSMB3 PE=1 SV=2	411.012	8.68304
P51504	6	2	ZNF80	Zinc finger protein 80 OS=Homo sapiens GN=ZNF80 PE=1 SV=2	409.977	8.6794
Q7Z4L5	19	3	TTC21B	Tetratricopeptide repeat protein 21B OS=Homo sapiens GN=TTC21B PE=1 SV=2	409.17	8.67656
Q96JM2	75	4	ZNF462	Zinc finger protein 462 OS=Homo sapiens GN=ZNF462 PE=1 SV=3	409.135	8.67643
P51841	7	2	GUCY2F	Retinal guanylyl cyclase 2 OS=Homo sapiens GN=GUCY2F PE=2 SV=2	408.328	8.67359
O14830	17	2	PPEF2	Serine/threonine-protein phosphatase with EF-hands 2 OS=Homo sapiens GN=PPEF2 PE=1 SV=2	408.176	8.67305
O75306	41	11	NDUFS2	NADH dehydrogenase [ubiquinone] iron-sulfur protein 2_ mitochondrial OS=Homo sapiens GN=NDUFS2 PE=1 SV=2	407.731	8.67147
P43490	35	4	NAMPT	Nicotinamide phosphoribosyltransferase OS=Homo sapiens GN=NAMPT PE=1 SV=1	407.16	8.66945
O14818	54	12	PSMA7	Proteasome subunit alpha type-7 OS=Homo sapiens GN=PSMA7 PE=1 SV=1	406.924	8.66861
Q92820	28	8	GGH	Gamma-glutamyl hydrolase OS=Homo sapiens GN=GGH PE=1 SV=2	406.716	8.66788
Q5TFE4	13	2	NT5DC1	5'-nucleotidase domain-containing protein 1 OS=Homo sapiens GN=NT5DC1 PE=1 SV=1	406.609	8.6675
Q969F2	8	4	NKD2	Protein naked cuticle homolog 2 OS=Homo sapiens GN=NKD2 PE=1 SV=1	405.929	8.66508
Q13123	48	5	IK	Protein Red OS=Homo sapiens GN=IK PE=1 SV=3	405.899	8.66498
Q86UR5	42	4	RIMS1	Regulating synaptic membrane exocytosis protein 1 OS=Homo sapiens GN=RIMS1 PE=1 SV=1	405.522	8.66364
Q9P2H0	20	3	CEP126	Centrosomal protein of 126 kDa OS=Homo sapiens GN=CEP126 PE=1 SV=3	405.359	8.66306
E9PGC8	170	2	MAP1A	Microtubule-associated protein 1A OS=Homo sapiens GN=MAP1A PE=1 SV=1	405.138	8.66227
P53618	98	27	COPB1	Coatomer subunit beta OS=Homo sapiens GN=COPB1 PE=1 SV=3	404.073	8.65847
Q16787	82	3	LAMA3	Laminin subunit alpha-3 OS=Homo sapiens GN=LAMA3 PE=1 SV=2	403.762	8.65736
O15230	20	2	LAMA5	Laminin subunit alpha-5 OS=Homo sapiens GN=LAMA5 PE=1 SV=8	402.541	8.65299
O75436	27	6	VPS26A	Vacuolar protein sorting-associated protein 26A OS=Homo sapiens GN=VPS26A PE=1 SV=2	402.014	8.6511
Q32MZ4	69	14	LRRFIP1	Leucine-rich repeat flightless-interacting protein 1 OS=Homo sapiens GN=LRRFIP1 PE=1 SV=2	401.83	8.65044
O75132	3	2	ZBED4	Zinc finger BED domain-containing protein 4 OS=Homo sapiens GN=ZBED4 PE=1 SV=2	401.739	8.65011
Q8IUX7	4	2	AEBP1	Adipocyte enhancer-binding protein 1 OS=Homo sapiens GN=AEBP1 PE=1 SV=1	401.566	8.64949
Q6ZTW0	8	3	TPGS1	Tubulin polyglutamylase complex subunit 1 OS=Homo sapiens GN=TPGS1 PE=1 SV=2	401.244	8.64833
O75475	52	21	PSIP1	PC4 and SFRS1-interacting protein OS=Homo sapiens GN=PSIP1 PE=1 SV=1	400.261	8.6448
P20042	51	15	EIF2S2	Eukaryotic translation initiation factor 2 subunit 2 OS=Homo sapiens GN=EIF2S2 PE=1 SV=2	399.832	8.64325
Q9NSE4	40	9	IARS2	Isoleucine--tRNA ligase_ mitochondrial OS=Homo sapiens GN=IARS2 PE=1 SV=2	399.549	8.64223
P13646	77	12	KRT13	Keratin_ type I cytoskeletal 13 OS=Homo sapiens GN=KRT13 PE=1 SV=4	398.835	8.63965
Q96HP0	42	3	DOCK6	Dedicator of cytokinesis protein 6 OS=Homo sapiens GN=DOCK6 PE=1 SV=3	398.472	8.63834
Q9NYU2	151	50	UGGT1	UDP-glucose:glycoprotein glucosyltransferase 1 OS=Homo sapiens GN=UGGT1 PE=1 SV=3	398.186	8.6373
O75460	17	3	ERN1	Serine/threonine-protein kinase/endoribonuclease IRE1 OS=Homo sapiens GN=ERN1 PE=1 SV=2	398.043	8.63678
Q13033	32	5	STRN3	Striatin-3 OS=Homo sapiens GN=STRN3 PE=1 SV=3	397.145	8.63352
Q5THK1	120	17	PRR14L	Protein PRR14L OS=Homo sapiens GN=PRR14L PE=1 SV=1	397.034	8.63312
Q5T6W2	55	4	HNRNPK	Heterogeneous nuclear ribonucleoprotein K (Fragment) OS=Homo sapiens GN=HNRNPK PE=1 SV=1	395.53	8.62764
P54098	63	11	POLG	DNA polymerase subunit gamma-1 OS=Homo sapiens GN=POLG PE=1 SV=1	392.801	8.61765
Q99536	50	10	VAT1	Synaptic vesicle membrane protein VAT-1 homolog OS=Homo sapiens GN=VAT1 PE=1 SV=2	392.751	8.61747
Q15907	29	2	RAB11B	Ras-related protein Rab-11B OS=Homo sapiens GN=RAB11B PE=1 SV=4	391.758	8.61382
Q9UPM8	11	3	AP4E1	AP-4 complex subunit epsilon-1 OS=Homo sapiens GN=AP4E1 PE=1 SV=2	391.736	8.61374
O75376	199	10	NCOR1	Nuclear receptor corepressor 1 OS=Homo sapiens GN=NCOR1 PE=1 SV=2	391.038	8.61116
Q5T200	231	51	ZC3H13	Zinc finger CCCH domain-containing protein 13 OS=Homo sapiens GN=ZC3H13 PE=1 SV=1	390.677	8.60983
O95757	100	7	HSPA4L	Heat shock 70 kDa protein 4L OS=Homo sapiens GN=HSPA4L PE=1 SV=3	390.305	8.60846
Q12756	117	7	KIF1A	Kinesin-like protein KIF1A OS=Homo sapiens GN=KIF1A PE=1 SV=2	388.315	8.60108
Q9P2N6	5	2	KANSL3	KAT8 regulatory NSL complex subunit 3 OS=Homo sapiens GN=KANSL3 PE=1 SV=2	388.034	8.60004
Q9C0I3	24	2	CCSER1	Serine-rich coiled-coil domain-containing protein 1 OS=Homo sapiens GN=CCSER1 PE=2 SV=2	387.416	8.59774
P40939	84	18	HADHA	Trifunctional enzyme subunit alpha_ mitochondrial OS=Homo sapiens GN=HADHA PE=1 SV=2	386.556	8.59453
Q96C24	8	3	SYTL4	Synaptotagmin-like protein 4 OS=Homo sapiens GN=SYTL4 PE=1 SV=2	386.255	8.59341
Q8N2N9	123	6	ANKRD36B	Ankyrin repeat domain-containing protein 36B OS=Homo sapiens GN=ANKRD36B PE=1 SV=4	386.21	8.59324
O95671	39	7	ASMTL	N-acetylserotonin O-methyltransferase-like protein OS=Homo sapiens GN=ASMTL PE=1 SV=3	386.08	8.59276
A0A1W2PQM2	29	4	TUBA1C	Tubulin alpha-1C chain OS=Homo sapiens GN=TUBA1C PE=1 SV=1	383.834	8.58434
P63010	107	11	AP2B1	AP-2 complex subunit beta OS=Homo sapiens GN=AP2B1 PE=1 SV=1	381.88	8.57697
P01833	17	2	PIGR	Polymeric immunoglobulin receptor OS=Homo sapiens GN=PIGR PE=1 SV=4	381.503	8.57555
P13473	9	7	LAMP2	Lysosome-associated membrane glycoprotein 2 OS=Homo sapiens GN=LAMP2 PE=1 SV=2	381.485	8.57548
P22695	59	11	UQCRC2	Cytochrome b-c1 complex subunit 2_ mitochondrial OS=Homo sapiens GN=UQCRC2 PE=1 SV=3	380.936	8.5734
P42785	11	4	PRCP	Lysosomal Pro-X carboxypeptidase OS=Homo sapiens GN=PRCP PE=1 SV=1	380.684	8.57245
Q7L7X3	56	8	TAOK1	Serine/threonine-protein kinase TAO1 OS=Homo sapiens GN=TAOK1 PE=1 SV=1	379.557	8.56817
P04181	37	14	OAT	Ornithine aminotransferase_ mitochondrial OS=Homo sapiens GN=OAT PE=1 SV=1	379.479	8.56788
A0A087WVD0	3	2	NCAM1	Neural cell adhesion molecule 1 (Fragment) OS=Homo sapiens GN=NCAM1 PE=1 SV=1	378.75	8.5651
Q9H0R5	8	2	GBP3	Guanylate-binding protein 3 OS=Homo sapiens GN=GBP3 PE=1 SV=3	378.743	8.56508
Q09028	41	9	RBBP4	Histone-binding protein RBBP4 OS=Homo sapiens GN=RBBP4 PE=1 SV=3	378.57	8.56442
P51659	104	16	HSD17B4	Peroxisomal multifunctional enzyme type 2 OS=Homo sapiens GN=HSD17B4 PE=1 SV=3	376.613	8.55694
Q13148	35	5	TARDBP	TAR DNA-binding protein 43 OS=Homo sapiens GN=TARDBP PE=1 SV=1	376.578	8.55681
Q96JI7	104	5	SPG11	Spatacsin OS=Homo sapiens GN=SPG11 PE=1 SV=3	376.235	8.55549
P05387	16	6	RPLP2	60S acidic ribosomal protein P2 OS=Homo sapiens GN=RPLP2 PE=1 SV=1	376.187	8.55531
Q6RI45	14	4	BRWD3	Bromodomain and WD repeat-containing protein 3 OS=Homo sapiens GN=BRWD3 PE=1 SV=2	375.977	8.5545
Q9H9Z2	26	12	LIN28A	Protein lin-28 homolog A OS=Homo sapiens GN=LIN28A PE=1 SV=1	375.636	8.55319
Q9Y2V2	8	4	CARHSP1	Calcium-regulated heat-stable protein 1 OS=Homo sapiens GN=CARHSP1 PE=1 SV=2	375.353	8.5521
Q7Z6Z7	163	36	HUWE1	E3 ubiquitin-protein ligase HUWE1 OS=Homo sapiens GN=HUWE1 PE=1 SV=3	375.297	8.55189
Q92538	27	5	GBF1	Golgi-specific brefeldin A-resistance guanine nucleotide exchange factor 1 OS=Homo sapiens GN=GBF1 PE=1 SV=2	374.89	8.55032
Q02252	48	8	ALDH6A1	Methylmalonate-semialdehyde dehydrogenase [acylating]_ mitochondrial OS=Homo sapiens GN=ALDH6A1 PE=1 SV=2	374.56	8.54905
P05198	38	8	EIF2S1	Eukaryotic translation initiation factor 2 subunit 1 OS=Homo sapiens GN=EIF2S1 PE=1 SV=3	373.202	8.54381
A6NC57	30	4	ANKRD62	Ankyrin repeat domain-containing protein 62 OS=Homo sapiens GN=ANKRD62 PE=2 SV=4	372.811	8.5423
Q96LB3	38	4	IFT74	Intraflagellar transport protein 74 homolog OS=Homo sapiens GN=IFT74 PE=1 SV=1	372.761	8.54211
O15061	110	7	SYNM	Synemin OS=Homo sapiens GN=SYNM PE=1 SV=2	372.557	8.54132
O43813	17	4	LANCL1	LanC-like protein 1 OS=Homo sapiens GN=LANCL1 PE=1 SV=1	372.227	8.54004
Q13315	91	6	ATM	Serine-protein kinase ATM OS=Homo sapiens GN=ATM PE=1 SV=4	371.896	8.53875
Q9NW64	10	2	RBM22	Pre-mRNA-splicing factor RBM22 OS=Homo sapiens GN=RBM22 PE=1 SV=1	371.385	8.53677
Q5QGS0	36	4	NEXMIF	Neurite extension and migration factor OS=Homo sapiens GN=NEXMIF PE=1 SV=1	370.655	8.53393
O00472	20	4	ELL2	RNA polymerase II elongation factor ELL2 OS=Homo sapiens GN=ELL2 PE=1 SV=2	369.74	8.53037
Q15738	18	4	NSDHL	Sterol-4-alpha-carboxylate 3-dehydrogenase_ decarboxylating OS=Homo sapiens GN=NSDHL PE=1 SV=2	368.681	8.52623
Q13011	32	3	ECH1	Delta(3_5)-Delta(2_4)-dienoyl-CoA isomerase_ mitochondrial OS=Homo sapiens GN=ECH1 PE=1 SV=2	367.971	8.52345
P13861	52	9	PRKAR2A	cAMP-dependent protein kinase type II-alpha regulatory subunit OS=Homo sapiens GN=PRKAR2A PE=1 SV=2	367.328	8.52093
Q9BTV4	13	5	TMEM43	Transmembrane protein 43 OS=Homo sapiens GN=TMEM43 PE=1 SV=1	366.02	8.51578
Q6IN85	46	3	PPP4R3A	Serine/threonine-protein phosphatase 4 regulatory subunit 3A OS=Homo sapiens GN=PPP4R3A PE=1 SV=1	365.842	8.51508
P29120	10	2	PCSK1	Neuroendocrine convertase 1 OS=Homo sapiens GN=PCSK1 PE=1 SV=2	365.608	8.51415
P12814	159	21	ACTN1	Alpha-actinin-1 OS=Homo sapiens GN=ACTN1 PE=1 SV=2	365.088	8.5121
Q9NY99	10	2	SNTG2	Gamma-2-syntrophin OS=Homo sapiens GN=SNTG2 PE=1 SV=2	364.984	8.51169
Q9P2B2	49	12	PTGFRN	Prostaglandin F2 receptor negative regulator OS=Homo sapiens GN=PTGFRN PE=1 SV=2	364.88	8.51128
Q8NHM5	51	5	KDM2B	Lysine-specific demethylase 2B OS=Homo sapiens GN=KDM2B PE=1 SV=1	364.876	8.51126
Q7Z3B4	34	10	NUP54	Nucleoporin p54 OS=Homo sapiens GN=NUP54 PE=1 SV=2	362.551	8.50204
Q92805	43	4	GOLGA1	Golgin subfamily A member 1 OS=Homo sapiens GN=GOLGA1 PE=1 SV=3	362.116	8.50031
O60307	27	5	MAST3	Microtubule-associated serine/threonine-protein kinase 3 OS=Homo sapiens GN=MAST3 PE=1 SV=2	361.7	8.49865
Q8N9K5	15	3	ZNF565	Zinc finger protein 565 OS=Homo sapiens GN=ZNF565 PE=2 SV=2	361.528	8.49796
Q86TI0	22	3	TBC1D1	TBC1 domain family member 1 OS=Homo sapiens GN=TBC1D1 PE=1 SV=2	360.346	8.49324
Q86TB9	23	6	PATL1	Protein PAT1 homolog 1 OS=Homo sapiens GN=PATL1 PE=1 SV=2	360.291	8.49302
O15144	49	19	ARPC2	Actin-related protein 2/3 complex subunit 2 OS=Homo sapiens GN=ARPC2 PE=1 SV=1	360.109	8.49229
Q9ULX6	22	5	AKAP8L	A-kinase anchor protein 8-like OS=Homo sapiens GN=AKAP8L PE=1 SV=3	360.048	8.49204
Q9Y243	25	4	AKT3	RAC-gamma serine/threonine-protein kinase OS=Homo sapiens GN=AKT3 PE=1 SV=1	359.403	8.48946
P21359	101	3	NF1	Neurofibromin OS=Homo sapiens GN=NF1 PE=1 SV=2	358.573	8.48612
O75197	16	3	LRP5	Low-density lipoprotein receptor-related protein 5 OS=Homo sapiens GN=LRP5 PE=1 SV=2	358.192	8.48459
Q9P0L0	42	12	VAPA	Vesicle-associated membrane protein-associated protein A OS=Homo sapiens GN=VAPA PE=1 SV=3	357.69	8.48257
Q9UHX1	56	9	PUF60	Poly(U)-binding-splicing factor PUF60 OS=Homo sapiens GN=PUF60 PE=1 SV=1	356.246	8.47673
P07686	24	3	HEXB	Beta-hexosaminidase subunit beta OS=Homo sapiens GN=HEXB PE=1 SV=3	355.573	8.474
Q9C0B2	55	9	CFAP74	Cilia- and flagella-associated protein 74 OS=Homo sapiens GN=CFAP74 PE=2 SV=3	354.786	8.4708
P29144	66	3	TPP2	Tripeptidyl-peptidase 2 OS=Homo sapiens GN=TPP2 PE=1 SV=4	354.225	8.46852
Q9UNH7	41	3	SNX6	Sorting nexin-6 OS=Homo sapiens GN=SNX6 PE=1 SV=1	353.883	8.46713
O00445	11	3	SYT5	Synaptotagmin-5 OS=Homo sapiens GN=SYT5 PE=1 SV=2	353.83	8.46691
Q8NFG4	9	2	FLCN	Folliculin OS=Homo sapiens GN=FLCN PE=1 SV=1	353.371	8.46504
Q96HS1	11	2	PGAM5	Serine/threonine-protein phosphatase PGAM5_ mitochondrial OS=Homo sapiens GN=PGAM5 PE=1 SV=2	352.5	8.46148
O00429	103	12	DNM1L	Dynamin-1-like protein OS=Homo sapiens GN=DNM1L PE=1 SV=2	351.046	8.45552
P49189	47	18	ALDH9A1	4-trimethylaminobutyraldehyde dehydrogenase OS=Homo sapiens GN=ALDH9A1 PE=1 SV=3	350.981	8.45525
Q86YF9	12	6	DZIP1	Zinc finger protein DZIP1 OS=Homo sapiens GN=DZIP1 PE=1 SV=1	350.571	8.45356
Q86XP3	52	7	DDX42	ATP-dependent RNA helicase DDX42 OS=Homo sapiens GN=DDX42 PE=1 SV=1	349.968	8.45108
Q6ZMW3	55	6	EML6	Echinoderm microtubule-associated protein-like 6 OS=Homo sapiens GN=EML6 PE=2 SV=2	349.331	8.44845
Q9H9S4	14	2	CAB39L	Calcium-binding protein 39-like OS=Homo sapiens GN=CAB39L PE=1 SV=3	349.124	8.4476
Q8N9B4	13	3	ANKRD42	Ankyrin repeat domain-containing protein 42 OS=Homo sapiens GN=ANKRD42 PE=2 SV=2	348.661	8.44568
O75955	63	3	FLOT1	Flotillin-1 OS=Homo sapiens GN=FLOT1 PE=1 SV=3	348.587	8.44537
Q13796	47	7	SHROOM2	Protein Shroom2 OS=Homo sapiens GN=SHROOM2 PE=1 SV=1	348.557	8.44525
Q9H0B6	69	11	KLC2	Kinesin light chain 2 OS=Homo sapiens GN=KLC2 PE=1 SV=1	348.34	8.44435
Q9HCJ6	12	2	VAT1L	Synaptic vesicle membrane protein VAT-1 homolog-like OS=Homo sapiens GN=VAT1L PE=1 SV=2	347.642	8.44146
P08621	49	10	SNRNP70	U1 small nuclear ribonucleoprotein 70 kDa OS=Homo sapiens GN=SNRNP70 PE=1 SV=2	347.419	8.44053
Q9P0K7	27	5	RAI14	Ankycorbin OS=Homo sapiens GN=RAI14 PE=1 SV=2	347.338	8.44019
P42356	82	14	PI4KA	Phosphatidylinositol 4-kinase alpha OS=Homo sapiens GN=PI4KA PE=1 SV=4	347.321	8.44013
Q9P2E9	159	6	RRBP1	Ribosome-binding protein 1 OS=Homo sapiens GN=RRBP1 PE=1 SV=4	346.544	8.43689
P35221	104	3	CTNNA1	Catenin alpha-1 OS=Homo sapiens GN=CTNNA1 PE=1 SV=1	346.29	8.43584
P39023	99	19	RPL3	60S ribosomal protein L3 OS=Homo sapiens GN=RPL3 PE=1 SV=2	345.71	8.43342
Q15019	57	9	SEPT2	Septin-2 OS=Homo sapiens GN=SEPT2 PE=1 SV=1	345.649	8.43316
O43592	55	18	XPOT	Exportin-T OS=Homo sapiens GN=XPOT PE=1 SV=2	345.596	8.43294
P07101	14	4	TH	Tyrosine 3-monooxygenase OS=Homo sapiens GN=TH PE=1 SV=5	345.271	8.43158
Q12929	49	10	EPS8	Epidermal growth factor receptor kinase substrate 8 OS=Homo sapiens GN=EPS8 PE=1 SV=1	343.114	8.42255
Q8NA69	12	2	TEX45	Testis-expressed protein 45 OS=Homo sapiens GN=TEX45 PE=2 SV=2	342.608	8.42041
O95219	19	4	SNX4	Sorting nexin-4 OS=Homo sapiens GN=SNX4 PE=1 SV=1	342.161	8.41853
Q7L099	79	12	RUFY3	Protein RUFY3 OS=Homo sapiens GN=RUFY3 PE=1 SV=1	342.028	8.41797
B2R5W2	43	2	HNRNPC	Heterogeneous nuclear ribonucleoproteins C1/C2 OS=Homo sapiens GN=HNRNPC PE=1 SV=1	341.504	8.41576
Q86W24	8	2	NLRP14	NACHT_ LRR and PYD domains-containing protein 14 OS=Homo sapiens GN=NLRP14 PE=1 SV=1	341.256	8.41471
Q8WZ64	32	6	ARAP2	Arf-GAP with Rho-GAP domain_ ANK repeat and PH domain-containing protein 2 OS=Homo sapiens GN=ARAP2 PE=1 SV=3	340.325	8.41077
Q6IMN6	26	3	CAPRIN2	Caprin-2 OS=Homo sapiens GN=CAPRIN2 PE=1 SV=1	340.267	8.41052
P10636	84	7	MAPT	Microtubule-associated protein tau OS=Homo sapiens GN=MAPT PE=1 SV=5	339.109	8.40561
Q96M42	5	4	LINC00479	Putative uncharacterized protein encoded by LINC00479 OS=Homo sapiens GN=LINC00479 PE=5 SV=2	338.647	8.40364
Q9C040	30	5	TRIM2	Tripartite motif-containing protein 2 OS=Homo sapiens GN=TRIM2 PE=1 SV=1	337.893	8.40042
Q86YR7	13	2	MCF2L2	Probable guanine nucleotide exchange factor MCF2L2 OS=Homo sapiens GN=MCF2L2 PE=2 SV=3	337.237	8.39762
O75445	46	10	USH2A	Usherin OS=Homo sapiens GN=USH2A PE=1 SV=3	337.063	8.39687
O15067	69	16	PFAS	Phosphoribosylformylglycinamidine synthase OS=Homo sapiens GN=PFAS PE=1 SV=4	337	8.39661
O60566	46	6	BUB1B	Mitotic checkpoint serine/threonine-protein kinase BUB1 beta OS=Homo sapiens GN=BUB1B PE=1 SV=3	335.071	8.38832
Q16584	20	2	MAP3K11	Mitogen-activated protein kinase kinase kinase 11 OS=Homo sapiens GN=MAP3K11 PE=1 SV=1	334.806	8.38718
Q13162	36	7	PRDX4	Peroxiredoxin-4 OS=Homo sapiens GN=PRDX4 PE=1 SV=1	333.996	8.38369
P35520	54	7	CBS	Cystathionine beta-synthase OS=Homo sapiens GN=CBS PE=1 SV=2	333.079	8.37972
P51149	43	6	RAB7A	Ras-related protein Rab-7a OS=Homo sapiens GN=RAB7A PE=1 SV=1	332.661	8.37791
O75534	78	12	CSDE1	Cold shock domain-containing protein E1 OS=Homo sapiens GN=CSDE1 PE=1 SV=2	332.084	8.3754
O94964	100	2	SOGA1	Protein SOGA1 OS=Homo sapiens GN=SOGA1 PE=1 SV=2	331.93	8.37474
P58397	9	3	ADAMTS12	A disintegrin and metalloproteinase with thrombospondin motifs 12 OS=Homo sapiens GN=ADAMTS12 PE=1 SV=2	331.226	8.37167
Q8TA94	14	3	ZNF563	Zinc finger protein 563 OS=Homo sapiens GN=ZNF563 PE=2 SV=1	330.828	8.36994
O43615	35	3	TIMM44	Mitochondrial import inner membrane translocase subunit TIM44 OS=Homo sapiens GN=TIMM44 PE=1 SV=2	330.823	8.36992
P30084	23	8	ECHS1	Enoyl-CoA hydratase_ mitochondrial OS=Homo sapiens GN=ECHS1 PE=1 SV=4	329.512	8.36419
Q9UNF1	53	4	MAGED2	Melanoma-associated antigen D2 OS=Homo sapiens GN=MAGED2 PE=1 SV=2	328.689	8.36058
Q01814	70	5	ATP2B2	Plasma membrane calcium-transporting ATPase 2 OS=Homo sapiens GN=ATP2B2 PE=1 SV=2	327.735	8.35639
P47897	72	8	QARS	Glutamine--tRNA ligase OS=Homo sapiens GN=QARS PE=1 SV=1	327.621	8.35589
Q06787	50	2	FMR1	Synaptic functional regulator FMR1 OS=Homo sapiens GN=FMR1 PE=1 SV=1	327.499	8.35535
Q9HCS7	33	3	XAB2	Pre-mRNA-splicing factor SYF1 OS=Homo sapiens GN=XAB2 PE=1 SV=2	327.16	8.35385
Q9UC07	14	4	ZNF69	Zinc finger protein 69 OS=Homo sapiens GN=ZNF69 PE=1 SV=2	326.777	8.35216
P53621	58	25	COPA	Coatomer subunit alpha OS=Homo sapiens GN=COPA PE=1 SV=2	326.504	8.35096
J3KPF0	84	2	HECTD4	Probable E3 ubiquitin-protein ligase HECTD4 OS=Homo sapiens GN=HECTD4 PE=1 SV=3	325.97	8.3486
Q9H2G2	102	10	SLK	STE20-like serine/threonine-protein kinase OS=Homo sapiens GN=SLK PE=1 SV=1	325.679	8.34731
P00491	25	9	PNP	Purine nucleoside phosphorylase OS=Homo sapiens GN=PNP PE=1 SV=2	325.211	8.34523
P08729	50	10	KRT7	Keratin_ type II cytoskeletal 7 OS=Homo sapiens GN=KRT7 PE=1 SV=5	324.07	8.34016
Q96K17	2	2	BTF3L4	Transcription factor BTF3 homolog 4 OS=Homo sapiens GN=BTF3L4 PE=1 SV=1	323.907	8.33943
Q8TBY0	3	2	RBM46	Probable RNA-binding protein 46 OS=Homo sapiens GN=RBM46 PE=2 SV=1	322.721	8.33415
P40123	49	6	CAP2	Adenylyl cyclase-associated protein 2 OS=Homo sapiens GN=CAP2 PE=1 SV=1	321.589	8.32908
Q8NDW8	43	7	TTC21A	Tetratricopeptide repeat protein 21A OS=Homo sapiens GN=TTC21A PE=2 SV=3	321.108	8.32692
Q9H2P0	36	9	ADNP	Activity-dependent neuroprotector homeobox protein OS=Homo sapiens GN=ADNP PE=1 SV=1	320.954	8.32622
P35222	73	8	CTNNB1	Catenin beta-1 OS=Homo sapiens GN=CTNNB1 PE=1 SV=1	320.631	8.32477
Q8N201	19	2	INTS1	Integrator complex subunit 1 OS=Homo sapiens GN=INTS1 PE=1 SV=2	320.631	8.32477
P17480	66	2	UBTF	Nucleolar transcription factor 1 OS=Homo sapiens GN=UBTF PE=1 SV=1	320.623	8.32474
Q99848	25	2	EBNA1BP2	Probable rRNA-processing protein EBP2 OS=Homo sapiens GN=EBNA1BP2 PE=1 SV=2	319.363	8.31905
Q96QE3	36	5	ATAD5	ATPase family AAA domain-containing protein 5 OS=Homo sapiens GN=ATAD5 PE=1 SV=4	319.188	8.31826
O76041	54	7	NEBL	Nebulette OS=Homo sapiens GN=NEBL PE=1 SV=1	318.774	8.31639
Q00722	18	3	PLCB2	1-phosphatidylinositol 4_5-bisphosphate phosphodiesterase beta-2 OS=Homo sapiens GN=PLCB2 PE=1 SV=2	318.415	8.31476
Q13153	55	5	PAK1	Serine/threonine-protein kinase PAK 1 OS=Homo sapiens GN=PAK1 PE=1 SV=2	318.352	8.31448
Q15652	65	3	JMJD1C	Probable JmjC domain-containing histone demethylation protein 2C OS=Homo sapiens GN=JMJD1C PE=1 SV=2	318.286	8.31418
Q9BYT8	91	12	NLN	Neurolysin_ mitochondrial OS=Homo sapiens GN=NLN PE=1 SV=1	318.135	8.3135
Q9Y277	24	7	VDAC3	Voltage-dependent anion-selective channel protein 3 OS=Homo sapiens GN=VDAC3 PE=1 SV=1	317.878	8.31233
Q6YHU6	32	9	THADA	Thyroid adenoma-associated protein OS=Homo sapiens GN=THADA PE=1 SV=1	317.628	8.31119
Q13228	21	3	SELENBP1	Selenium-binding protein 1 OS=Homo sapiens GN=SELENBP1 PE=1 SV=2	317.413	8.31022
Q9Y224	27	7	C14orf166	UPF0568 protein C14orf166 OS=Homo sapiens GN=C14orf166 PE=1 SV=1	317.321	8.3098
P56182	6	3	RRP1	Ribosomal RNA processing protein 1 homolog A OS=Homo sapiens GN=RRP1 PE=1 SV=1	316.677	8.30687
P01266	71	8	TG	Thyroglobulin OS=Homo sapiens GN=TG PE=1 SV=5	315.451	8.30127
Q9NPI1	15	3	BRD7	Bromodomain-containing protein 7 OS=Homo sapiens GN=BRD7 PE=1 SV=1	314.868	8.2986
Q6IQ23	30	2	PLEKHA7	Pleckstrin homology domain-containing family A member 7 OS=Homo sapiens GN=PLEKHA7 PE=1 SV=2	314.477	8.29681
Q14687	36	3	GSE1	Genetic suppressor element 1 OS=Homo sapiens GN=GSE1 PE=1 SV=3	313.817	8.29378
Q9P2P5	44	10	HECW2	E3 ubiquitin-protein ligase HECW2 OS=Homo sapiens GN=HECW2 PE=1 SV=2	313.285	8.29133
P51148	21	3	RAB5C	Ras-related protein Rab-5C OS=Homo sapiens GN=RAB5C PE=1 SV=2	313.017	8.2901
O15438	11	3	ABCC3	Canalicular multispecific organic anion transporter 2 OS=Homo sapiens GN=ABCC3 PE=1 SV=3	310.662	8.2792
Q9Y6G9	69	15	DYNC1LI1	Cytoplasmic dynein 1 light intermediate chain 1 OS=Homo sapiens GN=DYNC1LI1 PE=1 SV=3	309.819	8.27528
P56537	12	4	EIF6	Eukaryotic translation initiation factor 6 OS=Homo sapiens GN=EIF6 PE=1 SV=1	309.213	8.27246
P14314	84	17	PRKCSH	Glucosidase 2 subunit beta OS=Homo sapiens GN=PRKCSH PE=1 SV=2	307.731	8.26553
Q8WXG6	52	6	MADD	MAP kinase-activating death domain protein OS=Homo sapiens GN=MADD PE=1 SV=2	307.447	8.26419
Q8IYJ1	19	3	CPNE9	Copine-9 OS=Homo sapiens GN=CPNE9 PE=1 SV=3	307.177	8.26293
Q9BX66	52	8	SORBS1	Sorbin and SH3 domain-containing protein 1 OS=Homo sapiens GN=SORBS1 PE=1 SV=3	306.966	8.26193
O95433	42	5	AHSA1	Activator of 90 kDa heat shock protein ATPase homolog 1 OS=Homo sapiens GN=AHSA1 PE=1 SV=1	306.941	8.26182
A0AVT1	63	17	UBA6	Ubiquitin-like modifier-activating enzyme 6 OS=Homo sapiens GN=UBA6 PE=1 SV=1	306.435	8.25944
Q96RN1	15	3	SLC26A8	Testis anion transporter 1 OS=Homo sapiens GN=SLC26A8 PE=1 SV=1	306.182	8.25825
P10645	11	2	CHGA	Chromogranin-A OS=Homo sapiens GN=CHGA PE=1 SV=7	305.95	8.25715
O14745	42	7	SLC9A3R1	Na(+)/H(+) exchange regulatory cofactor NHE-RF1 OS=Homo sapiens GN=SLC9A3R1 PE=1 SV=4	305.95	8.25715
Q8N140	4	2	EID3	EP300-interacting inhibitor of differentiation 3 OS=Homo sapiens GN=EID3 PE=1 SV=1	305.697	8.25596
Q96G03	54	12	PGM2	Phosphoglucomutase-2 OS=Homo sapiens GN=PGM2 PE=1 SV=4	305.37	8.25442
P62249	22	6	RPS16	40S ribosomal protein S16 OS=Homo sapiens GN=RPS16 PE=1 SV=2	304.914	8.25226
Q9UMX0	39	8	UBQLN1	Ubiquilin-1 OS=Homo sapiens GN=UBQLN1 PE=1 SV=2	304.86	8.252
Q13137	18	2	CALCOCO2	Calcium-binding and coiled-coil domain-containing protein 2 OS=Homo sapiens GN=CALCOCO2 PE=1 SV=1	304.307	8.24938
Q7Z7M0	9	2	MEGF8	Multiple epidermal growth factor-like domains protein 8 OS=Homo sapiens GN=MEGF8 PE=1 SV=2	303.92	8.24755
P30613	25	4	PKLR	Pyruvate kinase PKLR OS=Homo sapiens GN=PKLR PE=1 SV=2	303.792	8.24694
Q9NY97	5	2	B3GNT2	N-acetyllactosaminide beta-1_3-N-acetylglucosaminyltransferase 2 OS=Homo sapiens GN=B3GNT2 PE=1 SV=2	303.727	8.24663
P07384	71	23	CAPN1	Calpain-1 catalytic subunit OS=Homo sapiens GN=CAPN1 PE=1 SV=1	303.403	8.24509
Q15054	11	3	POLD3	DNA polymerase delta subunit 3 OS=Homo sapiens GN=POLD3 PE=1 SV=2	303.125	8.24377
Q3SY84	31	3	KRT71	Keratin_ type II cytoskeletal 71 OS=Homo sapiens GN=KRT71 PE=1 SV=3	302.562	8.24109
P29320	33	2	EPHA3	Ephrin type-A receptor 3 OS=Homo sapiens GN=EPHA3 PE=1 SV=2	300.135	8.22947
Q13363	29	5	CTBP1	C-terminal-binding protein 1 OS=Homo sapiens GN=CTBP1 PE=1 SV=2	299.854	8.22811
Q9H2K8	29	4	TAOK3	Serine/threonine-protein kinase TAO3 OS=Homo sapiens GN=TAOK3 PE=1 SV=2	299.76	8.22767
P23396	58	10	RPS3	40S ribosomal protein S3 OS=Homo sapiens GN=RPS3 PE=1 SV=2	298.254	8.2204
P26583	23	3	HMGB2	High mobility group protein B2 OS=Homo sapiens GN=HMGB2 PE=1 SV=2	298.085	8.21958
O60293	43	6	ZFC3H1	Zinc finger C3H1 domain-containing protein OS=Homo sapiens GN=ZFC3H1 PE=1 SV=3	297.502	8.21676
P61221	41	5	ABCE1	ATP-binding cassette sub-family E member 1 OS=Homo sapiens GN=ABCE1 PE=1 SV=1	296.923	8.21394
P53602	23	2	MVD	Diphosphomevalonate decarboxylase OS=Homo sapiens GN=MVD PE=1 SV=1	296.882	8.21375
Q7Z6I6	14	3	ARHGAP30	Rho GTPase-activating protein 30 OS=Homo sapiens GN=ARHGAP30 PE=1 SV=3	296.632	8.21253
Q9UKA9	46	18	PTBP2	Polypyrimidine tract-binding protein 2 OS=Homo sapiens GN=PTBP2 PE=1 SV=1	296.575	8.21225
Q16513	25	2	PKN2	Serine/threonine-protein kinase N2 OS=Homo sapiens GN=PKN2 PE=1 SV=1	295.953	8.20923
A0A0B4J1Y9	3	2	IGHV3-72	Immunoglobulin heavy variable 3-72 OS=Homo sapiens GN=IGHV3-72 PE=3 SV=1	295.953	8.20922
Q7Z794	48	6	KRT77	Keratin_ type II cytoskeletal 1b OS=Homo sapiens GN=KRT77 PE=1 SV=3	295.121	8.20516
Q8NAT2	16	4	TDRD5	Tudor domain-containing protein 5 OS=Homo sapiens GN=TDRD5 PE=1 SV=3	295.114	8.20513
Q58FG0	30	6	HSP90AA5P	Putative heat shock protein HSP 90-alpha A5 OS=Homo sapiens GN=HSP90AA5P PE=2 SV=1	294.807	8.20363
Q9NZM3	84	3	ITSN2	Intersectin-2 OS=Homo sapiens GN=ITSN2 PE=1 SV=3	294.593	8.20258
Q06124	54	7	PTPN11	Tyrosine-protein phosphatase non-receptor type 11 OS=Homo sapiens GN=PTPN11 PE=1 SV=2	294.232	8.20081
O15075	51	12	DCLK1	Serine/threonine-protein kinase DCLK1 OS=Homo sapiens GN=DCLK1 PE=1 SV=2	294.203	8.20067
Q93050	58	10	ATP6V0A1	V-type proton ATPase 116 kDa subunit a isoform 1 OS=Homo sapiens GN=ATP6V0A1 PE=1 SV=3	294.086	8.2001
Q5VVM6	41	3	CCDC30	Coiled-coil domain-containing protein 30 OS=Homo sapiens GN=CCDC30 PE=2 SV=1	293.517	8.1973
Q9C0D4	23	3	ZNF518B	Zinc finger protein 518B OS=Homo sapiens GN=ZNF518B PE=1 SV=2	292.175	8.19069
Q9H095	17	4	IQCG	IQ domain-containing protein G OS=Homo sapiens GN=IQCG PE=1 SV=1	292.163	8.19063
Q9UQ90	26	4	SPG7	Paraplegin OS=Homo sapiens GN=SPG7 PE=1 SV=2	292.113	8.19038
Q92562	8	3	FIG4	Polyphosphoinositide phosphatase OS=Homo sapiens GN=FIG4 PE=1 SV=1	290.864	8.1842
P00568	18	3	AK1	Adenylate kinase isoenzyme 1 OS=Homo sapiens GN=AK1 PE=1 SV=3	288.381	8.17183
P52756	45	9	RBM5	RNA-binding protein 5 OS=Homo sapiens GN=RBM5 PE=1 SV=2	288.091	8.17038
Q6ZMV9	28	4	KIF6	Kinesin-like protein KIF6 OS=Homo sapiens GN=KIF6 PE=1 SV=3	287.618	8.16801
F8WE98	66	3	FLNA	Filamin-A (Fragment) OS=Homo sapiens GN=FLNA PE=1 SV=2	286.96	8.1647
O76094	50	8	SRP72	Signal recognition particle subunit SRP72 OS=Homo sapiens GN=SRP72 PE=1 SV=3	286.489	8.16234
Q8NEU8	20	4	APPL2	DCC-interacting protein 13-beta OS=Homo sapiens GN=APPL2 PE=1 SV=3	286.273	8.16125
Q9NRJ5	16	2	PAPOLB	Poly(A) polymerase beta OS=Homo sapiens GN=PAPOLB PE=2 SV=1	285.82	8.15896
P22626	135	50	HNRNPA2B1	Heterogeneous nuclear ribonucleoproteins A2/B1 OS=Homo sapiens GN=HNRNPA2B1 PE=1 SV=2	284.592	8.15275
P14324	34	3	FDPS	Farnesyl pyrophosphate synthase OS=Homo sapiens GN=FDPS PE=1 SV=4	283.574	8.14758
Q15027	11	4	ACAP1	Arf-GAP with coiled-coil_ ANK repeat and PH domain-containing protein 1 OS=Homo sapiens GN=ACAP1 PE=1 SV=1	283.114	8.14524
Q9H582	14	3	ZNF644	Zinc finger protein 644 OS=Homo sapiens GN=ZNF644 PE=1 SV=2	282.773	8.1435
Q9BPX5	7	5	ARPC5L	Actin-related protein 2/3 complex subunit 5-like protein OS=Homo sapiens GN=ARPC5L PE=1 SV=1	281.637	8.13769
Q9UBZ9	22	5	REV1	DNA repair protein REV1 OS=Homo sapiens GN=REV1 PE=1 SV=1	281.441	8.13669
P62136	29	3	PPP1CA	Serine/threonine-protein phosphatase PP1-alpha catalytic subunit OS=Homo sapiens GN=PPP1CA PE=1 SV=1	281.069	8.13478
Q9UPQ9	52	5	TNRC6B	Trinucleotide repeat-containing gene 6B protein OS=Homo sapiens GN=TNRC6B PE=1 SV=4	281.037	8.13462
O95425	75	7	SVIL	Supervillin OS=Homo sapiens GN=SVIL PE=1 SV=2	281.035	8.13461
Q1ED39	20	3	KNOP1	Lysine-rich nucleolar protein 1 OS=Homo sapiens GN=KNOP1 PE=1 SV=1	280.849	8.13365
P54920	45	4	NAPA	Alpha-soluble NSF attachment protein OS=Homo sapiens GN=NAPA PE=1 SV=3	280.823	8.13352
Q9UHG3	43	9	PCYOX1	Prenylcysteine oxidase 1 OS=Homo sapiens GN=PCYOX1 PE=1 SV=3	280.795	8.13337
Q5VWT5	18	4	FYB2	FYN-binding protein 2 OS=Homo sapiens GN=FYB2 PE=1 SV=1	278.014	8.11901
Q8NCA5	17	3	FAM98A	Protein FAM98A OS=Homo sapiens GN=FAM98A PE=1 SV=1	277.56	8.11666
Q9H3R0	20	3	KDM4C	Lysine-specific demethylase 4C OS=Homo sapiens GN=KDM4C PE=1 SV=2	276.854	8.11298
O14939	13	4	PLD2	Phospholipase D2 OS=Homo sapiens GN=PLD2 PE=1 SV=2	276.816	8.11278
P16144	44	8	ITGB4	Integrin beta-4 OS=Homo sapiens GN=ITGB4 PE=1 SV=5	276.772	8.11256
Q5M9N0	72	12	CCDC158	Coiled-coil domain-containing protein 158 OS=Homo sapiens GN=CCDC158 PE=2 SV=2	276.518	8.11123
Q96PY5	32	6	FMNL2	Formin-like protein 2 OS=Homo sapiens GN=FMNL2 PE=1 SV=3	276.395	8.11059
Q9NRR5	31	9	UBQLN4	Ubiquilin-4 OS=Homo sapiens GN=UBQLN4 PE=1 SV=2	275.743	8.10718
Q5XXA6	25	5	ANO1	Anoctamin-1 OS=Homo sapiens GN=ANO1 PE=1 SV=1	275.593	8.1064
O43759	5	2	SYNGR1	Synaptogyrin-1 OS=Homo sapiens GN=SYNGR1 PE=1 SV=2	275.514	8.10598
P07339	39	8	CTSD	Cathepsin D OS=Homo sapiens GN=CTSD PE=1 SV=1	275.445	8.10562
O75334	129	6	PPFIA2	Liprin-alpha-2 OS=Homo sapiens GN=PPFIA2 PE=1 SV=2	275.267	8.10469
Q9P273	35	6	TENM3	Teneurin-3 OS=Homo sapiens GN=TENM3 PE=2 SV=3	274.99	8.10324
Q92878	167	18	RAD50	DNA repair protein RAD50 OS=Homo sapiens GN=RAD50 PE=1 SV=1	273.937	8.0977
Q16222	14	2	UAP1	UDP-N-acetylhexosamine pyrophosphorylase OS=Homo sapiens GN=UAP1 PE=1 SV=3	273.464	8.09521
P84085	27	8	ARF5	ADP-ribosylation factor 5 OS=Homo sapiens GN=ARF5 PE=1 SV=2	272.443	8.08981
Q01826	17	5	SATB1	DNA-binding protein SATB1 OS=Homo sapiens GN=SATB1 PE=1 SV=1	271.752	8.08615
Q8NC60	8	2	NOA1	Nitric oxide-associated protein 1 OS=Homo sapiens GN=NOA1 PE=1 SV=2	271.529	8.08496
Q86X52	7	3	CHSY1	Chondroitin sulfate synthase 1 OS=Homo sapiens GN=CHSY1 PE=1 SV=3	271.49	8.08475
Q14974	102	19	KPNB1	Importin subunit beta-1 OS=Homo sapiens GN=KPNB1 PE=1 SV=2	270.9	8.08162
Q7RTP6	91	9	MICAL3	[F-actin]-monooxygenase MICAL3 OS=Homo sapiens GN=MICAL3 PE=1 SV=2	270.781	8.08098
Q13243	29	4	SRSF5	Serine/arginine-rich splicing factor 5 OS=Homo sapiens GN=SRSF5 PE=1 SV=1	269.972	8.07666
Q9UQM7	33	8	CAMK2A	Calcium/calmodulin-dependent protein kinase type II subunit alpha OS=Homo sapiens GN=CAMK2A PE=1 SV=2	269.846	8.07599
P32969	19	4	RPL9	60S ribosomal protein L9 OS=Homo sapiens GN=RPL9 PE=1 SV=1	269.054	8.07175
Q9H0L4	38	11	CSTF2T	Cleavage stimulation factor subunit 2 tau variant OS=Homo sapiens GN=CSTF2T PE=1 SV=1	268.911	8.07098
P30419	28	5	NMT1	Glycylpeptide N-tetradecanoyltransferase 1 OS=Homo sapiens GN=NMT1 PE=1 SV=2	268.067	8.06645
Q16363	42	3	LAMA4	Laminin subunit alpha-4 OS=Homo sapiens GN=LAMA4 PE=1 SV=4	267.637	8.06413
Q96EV2	16	3	RBM33	RNA-binding protein 33 OS=Homo sapiens GN=RBM33 PE=1 SV=3	267.593	8.06389
Q08J23	62	12	NSUN2	tRNA (cytosine(34)-C(5))-methyltransferase OS=Homo sapiens GN=NSUN2 PE=1 SV=2	266.668	8.0589
Q96CN9	31	5	GCC1	GRIP and coiled-coil domain-containing protein 1 OS=Homo sapiens GN=GCC1 PE=1 SV=1	266.284	8.05682
Q9BXU1	50	10	STK31	Serine/threonine-protein kinase 31 OS=Homo sapiens GN=STK31 PE=2 SV=2	265.87	8.05458
Q9BS26	33	11	ERP44	Endoplasmic reticulum resident protein 44 OS=Homo sapiens GN=ERP44 PE=1 SV=1	265.5	8.05257
Q8NC96	10	2	NECAP1	Adaptin ear-binding coat-associated protein 1 OS=Homo sapiens GN=NECAP1 PE=1 SV=2	264.946	8.04955
P16435	45	2	POR	NADPH--cytochrome P450 reductase OS=Homo sapiens GN=POR PE=1 SV=2	264.64	8.04789
Q9H2M9	31	5	RAB3GAP2	Rab3 GTPase-activating protein non-catalytic subunit OS=Homo sapiens GN=RAB3GAP2 PE=1 SV=1	264.425	8.04672
Q9UJC3	23	6	HOOK1	Protein Hook homolog 1 OS=Homo sapiens GN=HOOK1 PE=1 SV=2	264.362	8.04637
P12107	34	5	COL11A1	Collagen alpha-1(XI) chain OS=Homo sapiens GN=COL11A1 PE=1 SV=4	264.355	8.04633
H0Y2S9	137	7	MPRIP	Myosin phosphatase Rho-interacting protein (Fragment) OS=Homo sapiens GN=MPRIP PE=1 SV=3	263.954	8.04414
O60716	92	4	CTNND1	Catenin delta-1 OS=Homo sapiens GN=CTNND1 PE=1 SV=1	263.479	8.04155
Q16836	26	2	HADH	Hydroxyacyl-coenzyme A dehydrogenase_ mitochondrial OS=Homo sapiens GN=HADH PE=1 SV=3	262.86	8.03815
O95071	121	3	UBR5	E3 ubiquitin-protein ligase UBR5 OS=Homo sapiens GN=UBR5 PE=1 SV=2	262.839	8.03803
Q9UKX7	26	5	NUP50	Nuclear pore complex protein Nup50 OS=Homo sapiens GN=NUP50 PE=1 SV=2	262.758	8.03759
Q15020	81	13	SART3	Squamous cell carcinoma antigen recognized by T-cells 3 OS=Homo sapiens GN=SART3 PE=1 SV=1	262.624	8.03686
O95793	40	3	STAU1	Double-stranded RNA-binding protein Staufen homolog 1 OS=Homo sapiens GN=STAU1 PE=1 SV=2	262.559	8.0365
Q01432	21	2	AMPD3	AMP deaminase 3 OS=Homo sapiens GN=AMPD3 PE=1 SV=1	262.546	8.03643
P13535	88	4	MYH8	Myosin-8 OS=Homo sapiens GN=MYH8 PE=1 SV=3	262.223	8.03465
P36915	26	7	GNL1	Guanine nucleotide-binding protein-like 1 OS=Homo sapiens GN=GNL1 PE=1 SV=2	261.819	8.03242
Q99747	24	7	NAPG	Gamma-soluble NSF attachment protein OS=Homo sapiens GN=NAPG PE=1 SV=1	261.278	8.02944
O60885	58	9	BRD4	Bromodomain-containing protein 4 OS=Homo sapiens GN=BRD4 PE=1 SV=2	260.78	8.02669
Q86VQ3	4	2	TXNDC2	Thioredoxin domain-containing protein 2 OS=Homo sapiens GN=TXNDC2 PE=1 SV=4	260.543	8.02538
M0QXQ7	2	2	KLK2	Kallikrein-2 (Fragment) OS=Homo sapiens GN=KLK2 PE=4 SV=1	260.115	8.02301
P24666	13	2	ACP1	Low molecular weight phosphotyrosine protein phosphatase OS=Homo sapiens GN=ACP1 PE=1 SV=3	259.776	8.02112
Q14376	16	2	GALE	UDP-glucose 4-epimerase OS=Homo sapiens GN=GALE PE=1 SV=2	259.721	8.02082
O60522	22	6	TDRD6	Tudor domain-containing protein 6 OS=Homo sapiens GN=TDRD6 PE=2 SV=2	259.297	8.01846
O43399	35	5	TPD52L2	Tumor protein D54 OS=Homo sapiens GN=TPD52L2 PE=1 SV=2	259.031	8.01698
Q96NG3	44	5	TTC25	Tetratricopeptide repeat protein 25 OS=Homo sapiens GN=TTC25 PE=1 SV=2	258.229	8.01251
P38117	22	5	ETFB	Electron transfer flavoprotein subunit beta OS=Homo sapiens GN=ETFB PE=1 SV=3	257.34	8.00753
P13637	113	7	ATP1A3	Sodium/potassium-transporting ATPase subunit alpha-3 OS=Homo sapiens GN=ATP1A3 PE=1 SV=3	256.924	8.0052
O43683	25	5	BUB1	Mitotic checkpoint serine/threonine-protein kinase BUB1 OS=Homo sapiens GN=BUB1 PE=1 SV=1	256.805	8.00453
Q6BDS2	35	2	UHRF1BP1	UHRF1-binding protein 1 OS=Homo sapiens GN=UHRF1BP1 PE=1 SV=1	256.635	8.00358
Q9P212	18	4	PLCE1	1-phosphatidylinositol 4_5-bisphosphate phosphodiesterase epsilon-1 OS=Homo sapiens GN=PLCE1 PE=1 SV=3	256.239	8.00135
Q92769	56	13	HDAC2	Histone deacetylase 2 OS=Homo sapiens GN=HDAC2 PE=1 SV=2	256.192	8.00108
Q5TAX3	79	2	ZCCHC11	Terminal uridylyltransferase 4 OS=Homo sapiens GN=ZCCHC11 PE=1 SV=3	255.852	7.99917
P08708	19	3	RPS17	40S ribosomal protein S17 OS=Homo sapiens GN=RPS17 PE=1 SV=2	255.818	7.99897
Q9BY12	56	6	SCAPER	S phase cyclin A-associated protein in the endoplasmic reticulum OS=Homo sapiens GN=SCAPER PE=1 SV=2	255.083	7.99482
P98160	44	6	HSPG2	Basement membrane-specific heparan sulfate proteoglycan core protein OS=Homo sapiens GN=HSPG2 PE=1 SV=4	254.624	7.99222
Q7Z4S6	106	5	KIF21A	Kinesin-like protein KIF21A OS=Homo sapiens GN=KIF21A PE=1 SV=2	253.757	7.9873
P35232	54	15	PHB	Prohibitin OS=Homo sapiens GN=PHB PE=1 SV=1	253.196	7.98411
Q01130	22	3	SRSF2	Serine/arginine-rich splicing factor 2 OS=Homo sapiens GN=SRSF2 PE=1 SV=4	252.938	7.98264
Q96F07	95	3	CYFIP2	Cytoplasmic FMR1-interacting protein 2 OS=Homo sapiens GN=CYFIP2 PE=1 SV=2	252.698	7.98127
O43854	24	7	EDIL3	EGF-like repeat and discoidin I-like domain-containing protein 3 OS=Homo sapiens GN=EDIL3 PE=1 SV=1	252.572	7.98055
G3V3A5	72	9	TTC6	Tetratricopeptide repeat protein 6 OS=Homo sapiens GN=TTC6 PE=1 SV=1	252.406	7.9796
Q96CX2	26	4	KCTD12	BTB/POZ domain-containing protein KCTD12 OS=Homo sapiens GN=KCTD12 PE=1 SV=1	252.294	7.97896
Q92522	19	5	H1FX	Histone H1x OS=Homo sapiens GN=H1FX PE=1 SV=1	252.19	7.97837
P10253	32	5	GAA	Lysosomal alpha-glucosidase OS=Homo sapiens GN=GAA PE=1 SV=4	252.095	7.97782
P13796	35	8	LCP1	Plastin-2 OS=Homo sapiens GN=LCP1 PE=1 SV=6	251.902	7.97672
Q8TAT6	27	3	NPLOC4	Nuclear protein localization protein 4 homolog OS=Homo sapiens GN=NPLOC4 PE=1 SV=3	251.77	7.97596
G5EA03	43	5	LIMCH1	LIM and calponin homology domains-containing protein 1 OS=Homo sapiens GN=LIMCH1 PE=1 SV=1	251.672	7.9754
P13533	82	3	MYH6	Myosin-6 OS=Homo sapiens GN=MYH6 PE=1 SV=5	251.634	7.97518
Q6ZV73	43	2	FGD6	FYVE_ RhoGEF and PH domain-containing protein 6 OS=Homo sapiens GN=FGD6 PE=1 SV=2	250.684	7.96973
Q12797	28	4	ASPH	Aspartyl/asparaginyl beta-hydroxylase OS=Homo sapiens GN=ASPH PE=1 SV=3	250.512	7.96874
O95359	180	11	TACC2	Transforming acidic coiled-coil-containing protein 2 OS=Homo sapiens GN=TACC2 PE=1 SV=3	250.499	7.96866
P51116	45	9	FXR2	Fragile X mental retardation syndrome-related protein 2 OS=Homo sapiens GN=FXR2 PE=1 SV=2	250.452	7.96839
Q8TDR0	10	2	TRAF3IP1	TRAF3-interacting protein 1 OS=Homo sapiens GN=TRAF3IP1 PE=1 SV=1	250.238	7.96716
Q9Y6D9	52	8	MAD1L1	Mitotic spindle assembly checkpoint protein MAD1 OS=Homo sapiens GN=MAD1L1 PE=1 SV=2	250.038	7.966
P49639	3	2	HOXA1	Homeobox protein Hox-A1 OS=Homo sapiens GN=HOXA1 PE=1 SV=2	249.683	7.96395
Q14978	30	2	NOLC1	Nucleolar and coiled-body phosphoprotein 1 OS=Homo sapiens GN=NOLC1 PE=1 SV=2	249.358	7.96208
P49755	22	3	TMED10	Transmembrane emp24 domain-containing protein 10 OS=Homo sapiens GN=TMED10 PE=1 SV=2	249.082	7.96048
Q93009	96	5	USP7	Ubiquitin carboxyl-terminal hydrolase 7 OS=Homo sapiens GN=USP7 PE=1 SV=2	248.605	7.95771
Q8WWZ7	34	3	ABCA5	ATP-binding cassette sub-family A member 5 OS=Homo sapiens GN=ABCA5 PE=2 SV=2	248.427	7.95668
Q01650	10	4	SLC7A5	Large neutral amino acids transporter small subunit 1 OS=Homo sapiens GN=SLC7A5 PE=1 SV=2	248.356	7.95627
Q6KC79	52	7	NIPBL	Nipped-B-like protein OS=Homo sapiens GN=NIPBL PE=1 SV=2	247.652	7.95217
P12111	117	17	COL6A3	Collagen alpha-3(VI) chain OS=Homo sapiens GN=COL6A3 PE=1 SV=5	247.435	7.95091
P62917	40	7	RPL8	60S ribosomal protein L8 OS=Homo sapiens GN=RPL8 PE=1 SV=2	246.574	7.94588
Q00688	25	6	FKBP3	Peptidyl-prolyl cis-trans isomerase FKBP3 OS=Homo sapiens GN=FKBP3 PE=1 SV=1	246.369	7.94467
O75054	27	9	IGSF3	Immunoglobulin superfamily member 3 OS=Homo sapiens GN=IGSF3 PE=2 SV=3	245.784	7.94125
Q3MJ40	32	2	CCDC144B	Coiled-coil domain-containing protein 144B OS=Homo sapiens GN=CCDC144B PE=2 SV=1	245.669	7.94057
Q8TDR2	4	2	STK35	Serine/threonine-protein kinase 35 OS=Homo sapiens GN=STK35 PE=1 SV=2	245.663	7.94054
P56282	4	2	POLE2	DNA polymerase epsilon subunit 2 OS=Homo sapiens GN=POLE2 PE=1 SV=2	245.416	7.93909
Q494V2	24	4	CFAP100	Cilia- and flagella-associated protein 100 OS=Homo sapiens GN=CFAP100 PE=2 SV=1	245.31	7.93846
Q8TEM1	32	10	NUP210	Nuclear pore membrane glycoprotein 210 OS=Homo sapiens GN=NUP210 PE=1 SV=3	244.904	7.93607
P13804	33	2	ETFA	Electron transfer flavoprotein subunit alpha_ mitochondrial OS=Homo sapiens GN=ETFA PE=1 SV=1	244.497	7.93367
Q96RT1	23	3	ERBIN	Erbin OS=Homo sapiens GN=ERBIN PE=1 SV=2	244.405	7.93313
Q6ZRK6	55	12	CCDC73	Coiled-coil domain-containing protein 73 OS=Homo sapiens GN=CCDC73 PE=2 SV=2	243.633	7.92856
Q14141	52	5	SEPT6	Septin-6 OS=Homo sapiens GN=SEPT6 PE=1 SV=4	243.196	7.92598
Q9BXL6	24	6	CARD14	Caspase recruitment domain-containing protein 14 OS=Homo sapiens GN=CARD14 PE=1 SV=2	242.84	7.92386
O96008	19	7	TOMM40	Mitochondrial import receptor subunit TOM40 homolog OS=Homo sapiens GN=TOMM40 PE=1 SV=1	242.599	7.92243
Q13464	126	8	ROCK1	Rho-associated protein kinase 1 OS=Homo sapiens GN=ROCK1 PE=1 SV=1	242.078	7.91933
F8W9U4	68	5	MAP4	Microtubule-associated protein OS=Homo sapiens GN=MAP4 PE=1 SV=1	242.014	7.91895
Q9H4E7	29	5	DEF6	Differentially expressed in FDCP 6 homolog OS=Homo sapiens GN=DEF6 PE=1 SV=1	241.607	7.91652
P14923	32	6	JUP	Junction plakoglobin OS=Homo sapiens GN=JUP PE=1 SV=3	241.035	7.9131
Q13574	31	3	DGKZ	Diacylglycerol kinase zeta OS=Homo sapiens GN=DGKZ PE=1 SV=3	240.974	7.91273
Q13136	94	9	PPFIA1	Liprin-alpha-1 OS=Homo sapiens GN=PPFIA1 PE=1 SV=1	240.298	7.90868
A6NHQ2	13	5	FBLL1	rRNA/tRNA 2'-O-methyltransferase fibrillarin-like protein 1 OS=Homo sapiens GN=FBLL1 PE=3 SV=2	239.722	7.90522
Q49A88	23	3	CCDC14	Coiled-coil domain-containing protein 14 OS=Homo sapiens GN=CCDC14 PE=1 SV=3	239.533	7.90408
P61026	30	12	RAB10	Ras-related protein Rab-10 OS=Homo sapiens GN=RAB10 PE=1 SV=1	238.994	7.90083
Q96BP3	31	5	PPWD1	Peptidylprolyl isomerase domain and WD repeat-containing protein 1 OS=Homo sapiens GN=PPWD1 PE=1 SV=1	238.834	7.89986
Q9P287	6	3	BCCIP	BRCA2 and CDKN1A-interacting protein OS=Homo sapiens GN=BCCIP PE=1 SV=1	238.425	7.89739
Q8IY63	18	3	AMOTL1	Angiomotin-like protein 1 OS=Homo sapiens GN=AMOTL1 PE=1 SV=1	238.195	7.896
Q9BPW8	42	13	NIPSNAP1	Protein NipSnap homolog 1 OS=Homo sapiens GN=NIPSNAP1 PE=1 SV=1	238.078	7.89529
Q7Z6G8	35	3	ANKS1B	Ankyrin repeat and sterile alpha motif domain-containing protein 1B OS=Homo sapiens GN=ANKS1B PE=1 SV=2	236.926	7.88829
O95373	64	28	IPO7	Importin-7 OS=Homo sapiens GN=IPO7 PE=1 SV=1	236.819	7.88764
Q9UIJ7	14	5	AK3	GTP:AMP phosphotransferase AK3_ mitochondrial OS=Homo sapiens GN=AK3 PE=1 SV=4	236.748	7.88721
Q16531	113	15	DDB1	DNA damage-binding protein 1 OS=Homo sapiens GN=DDB1 PE=1 SV=1	236.108	7.8833
Q9HCD5	60	8	NCOA5	Nuclear receptor coactivator 5 OS=Homo sapiens GN=NCOA5 PE=1 SV=2	235.73	7.88099
P11172	36	3	UMPS	Uridine 5'-monophosphate synthase OS=Homo sapiens GN=UMPS PE=1 SV=1	235.572	7.88003
Q9UIF8	40	5	BAZ2B	Bromodomain adjacent to zinc finger domain protein 2B OS=Homo sapiens GN=BAZ2B PE=1 SV=3	234.971	7.87634
Q9NP72	17	4	RAB18	Ras-related protein Rab-18 OS=Homo sapiens GN=RAB18 PE=1 SV=1	234.754	7.875
Q92541	72	15	RTF1	RNA polymerase-associated protein RTF1 homolog OS=Homo sapiens GN=RTF1 PE=1 SV=4	234.512	7.87352
O00555	80	3	CACNA1A	Voltage-dependent P/Q-type calcium channel subunit alpha-1A OS=Homo sapiens GN=CACNA1A PE=1 SV=2	234.343	7.87248
Q5VZ89	30	4	DENND4C	DENN domain-containing protein 4C OS=Homo sapiens GN=DENND4C PE=1 SV=3	233.516	7.86738
Q9H7E2	17	2	TDRD3	Tudor domain-containing protein 3 OS=Homo sapiens GN=TDRD3 PE=1 SV=1	233.501	7.86729
Q9UP83	10	3	COG5	Conserved oligomeric Golgi complex subunit 5 OS=Homo sapiens GN=COG5 PE=1 SV=3	232.934	7.86378
A8MQ02	160	2	AFDN	Afadin OS=Homo sapiens GN=AFDN PE=1 SV=2	232.643	7.86198
Q9ULV4	35	4	CORO1C	Coronin-1C OS=Homo sapiens GN=CORO1C PE=1 SV=1	232.564	7.86149
P45983	8	2	MAPK8	Mitogen-activated protein kinase 8 OS=Homo sapiens GN=MAPK8 PE=1 SV=2	232.47	7.8609
J3KNJ4	3	2	ASCC3	Activating signal cointegrator 1 complex subunit 3 OS=Homo sapiens GN=ASCC3 PE=1 SV=1	232.423	7.86061
Q8NCX0	63	6	CCDC150	Coiled-coil domain-containing protein 150 OS=Homo sapiens GN=CCDC150 PE=1 SV=2	232.273	7.85968
Q9UMZ2	45	10	SYNRG	Synergin gamma OS=Homo sapiens GN=SYNRG PE=1 SV=2	231.895	7.85733
O14513	83	5	NCKAP5	Nck-associated protein 5 OS=Homo sapiens GN=NCKAP5 PE=1 SV=2	231.558	7.85523
P16615	78	5	ATP2A2	Sarcoplasmic/endoplasmic reticulum calcium ATPase 2 OS=Homo sapiens GN=ATP2A2 PE=1 SV=1	231.424	7.8544
Q8NFA0	51	5	USP32	Ubiquitin carboxyl-terminal hydrolase 32 OS=Homo sapiens GN=USP32 PE=1 SV=1	230.961	7.8515
P15531	34	2	NME1	Nucleoside diphosphate kinase A OS=Homo sapiens GN=NME1 PE=1 SV=1	230.095	7.84609
Q6NXT6	10	2	TAPT1	Transmembrane anterior posterior transformation protein 1 homolog OS=Homo sapiens GN=TAPT1 PE=1 SV=1	229.599	7.84298
P53992	30	2	SEC24C	Protein transport protein Sec24C OS=Homo sapiens GN=SEC24C PE=1 SV=3	229.583	7.84287
Q9P270	18	3	SLAIN2	SLAIN motif-containing protein 2 OS=Homo sapiens GN=SLAIN2 PE=1 SV=2	229.527	7.84252
Q58FG1	47	7	HSP90AA4P	Putative heat shock protein HSP 90-alpha A4 OS=Homo sapiens GN=HSP90AA4P PE=5 SV=1	229.251	7.84079
Q12774	44	4	ARHGEF5	Rho guanine nucleotide exchange factor 5 OS=Homo sapiens GN=ARHGEF5 PE=1 SV=3	229.218	7.84058
Q96CN7	7	2	ISOC1	Isochorismatase domain-containing protein 1 OS=Homo sapiens GN=ISOC1 PE=1 SV=3	229.164	7.84023
P06213	15	2	INSR	Insulin receptor OS=Homo sapiens GN=INSR PE=1 SV=4	229.089	7.83976
O00303	23	12	EIF3F	Eukaryotic translation initiation factor 3 subunit F OS=Homo sapiens GN=EIF3F PE=1 SV=1	229.085	7.83974
P60866	10	4	RPS20	40S ribosomal protein S20 OS=Homo sapiens GN=RPS20 PE=1 SV=1	228.97	7.83901
P61247	72	17	RPS3A	40S ribosomal protein S3a OS=Homo sapiens GN=RPS3A PE=1 SV=2	228.611	7.83675
P08754	38	8	GNAI3	Guanine nucleotide-binding protein G(k) subunit alpha OS=Homo sapiens GN=GNAI3 PE=1 SV=3	228.059	7.83327
Q9Y473	17	3	ZNF175	Zinc finger protein 175 OS=Homo sapiens GN=ZNF175 PE=1 SV=1	227.73	7.83118
O75122	126	5	CLASP2	CLIP-associating protein 2 OS=Homo sapiens GN=CLASP2 PE=1 SV=2	227.157	7.82754
P08758	88	24	ANXA5	Annexin A5 OS=Homo sapiens GN=ANXA5 PE=1 SV=2	226.755	7.82499
O00505	16	7	KPNA3	Importin subunit alpha-4 OS=Homo sapiens GN=KPNA3 PE=1 SV=2	226.607	7.82405
P62081	33	13	RPS7	40S ribosomal protein S7 OS=Homo sapiens GN=RPS7 PE=1 SV=1	226.445	7.82301
P25788	43	5	PSMA3	Proteasome subunit alpha type-3 OS=Homo sapiens GN=PSMA3 PE=1 SV=2	226.421	7.82287
P11171	50	4	EPB41	Protein 4.1 OS=Homo sapiens GN=EPB41 PE=1 SV=4	226.245	7.82174
Q8ND30	64	6	PPFIBP2	Liprin-beta-2 OS=Homo sapiens GN=PPFIBP2 PE=1 SV=3	226.014	7.82027
Q13009	69	12	TIAM1	T-lymphoma invasion and metastasis-inducing protein 1 OS=Homo sapiens GN=TIAM1 PE=1 SV=2	225.683	7.81815
O94856	126	9	NFASC	Neurofascin OS=Homo sapiens GN=NFASC PE=1 SV=4	224.972	7.8136
Q8NFW9	10	2	MYRIP	Rab effector MyRIP OS=Homo sapiens GN=MYRIP PE=1 SV=2	224.611	7.81129
O15195	29	5	VILL	Villin-like protein OS=Homo sapiens GN=VILL PE=2 SV=3	224.546	7.81087
Q96HE7	41	12	ERO1A	ERO1-like protein alpha OS=Homo sapiens GN=ERO1A PE=1 SV=2	224.468	7.81036
Q14568	67	19	HSP90AA2P	Heat shock protein HSP 90-alpha A2 OS=Homo sapiens GN=HSP90AA2P PE=1 SV=2	224.105	7.80803
P11274	53	9	BCR	Breakpoint cluster region protein OS=Homo sapiens GN=BCR PE=1 SV=2	224.081	7.80788
Q9UKJ3	20	4	GPATCH8	G patch domain-containing protein 8 OS=Homo sapiens GN=GPATCH8 PE=1 SV=2	223.328	7.80302
Q9NRX4	7	2	PHPT1	14 kDa phosphohistidine phosphatase OS=Homo sapiens GN=PHPT1 PE=1 SV=1	223.002	7.80091
P20849	10	2	COL9A1	Collagen alpha-1(IX) chain OS=Homo sapiens GN=COL9A1 PE=1 SV=3	222.894	7.80021
P50749	4	2	RASSF2	Ras association domain-containing protein 2 OS=Homo sapiens GN=RASSF2 PE=1 SV=1	222.728	7.79914
P54289	55	12	CACNA2D1	Voltage-dependent calcium channel subunit alpha-2/delta-1 OS=Homo sapiens GN=CACNA2D1 PE=1 SV=3	221.937	7.794
Q9UPV7	10	3	PHF24	PHD finger protein 24 OS=Homo sapiens GN=PHF24 PE=1 SV=2	221.88	7.79364
P62993	25	8	GRB2	Growth factor receptor-bound protein 2 OS=Homo sapiens GN=GRB2 PE=1 SV=1	220.853	7.78694
O43488	24	2	AKR7A2	Aflatoxin B1 aldehyde reductase member 2 OS=Homo sapiens GN=AKR7A2 PE=1 SV=3	220.778	7.78646
Q99613	89	7	EIF3C	Eukaryotic translation initiation factor 3 subunit C OS=Homo sapiens GN=EIF3C PE=1 SV=1	220.002	7.78138
O14490	18	2	DLGAP1	Disks large-associated protein 1 OS=Homo sapiens GN=DLGAP1 PE=1 SV=1	219.759	7.77978
Q6ZN84	6	2	CCDC81	Coiled-coil domain-containing protein 81 OS=Homo sapiens GN=CCDC81 PE=2 SV=2	218.93	7.77432
O95678	60	5	KRT75	Keratin_ type II cytoskeletal 75 OS=Homo sapiens GN=KRT75 PE=1 SV=2	218.884	7.77402
Q70EK8	26	5	USP53	Inactive ubiquitin carboxyl-terminal hydrolase 53 OS=Homo sapiens GN=USP53 PE=1 SV=2	218.856	7.77384
O14920	11	2	IKBKB	Inhibitor of nuclear factor kappa-B kinase subunit beta OS=Homo sapiens GN=IKBKB PE=1 SV=1	218.675	7.77264
Q6ZWK6	2	2	TMPRSS11F	Transmembrane protease serine 11F OS=Homo sapiens GN=TMPRSS11F PE=2 SV=2	217.61	7.7656
P36543	32	4	ATP6V1E1	V-type proton ATPase subunit E 1 OS=Homo sapiens GN=ATP6V1E1 PE=1 SV=1	217.472	7.76469
Q92688	20	5	ANP32B	Acidic leucine-rich nuclear phosphoprotein 32 family member B OS=Homo sapiens GN=ANP32B PE=1 SV=1	216.961	7.76129
P36405	8	6	ARL3	ADP-ribosylation factor-like protein 3 OS=Homo sapiens GN=ARL3 PE=1 SV=2	216.51	7.75829
Q6P2E9	38	8	EDC4	Enhancer of mRNA-decapping protein 4 OS=Homo sapiens GN=EDC4 PE=1 SV=1	216.508	7.75827
O00222	9	3	GRM8	Metabotropic glutamate receptor 8 OS=Homo sapiens GN=GRM8 PE=2 SV=2	216.497	7.75821
P20020	116	16	ATP2B1	Plasma membrane calcium-transporting ATPase 1 OS=Homo sapiens GN=ATP2B1 PE=1 SV=3	216.361	7.7573
Q6P3R8	17	2	NEK5	Serine/threonine-protein kinase Nek5 OS=Homo sapiens GN=NEK5 PE=2 SV=1	216.241	7.75649
P35900	33	7	KRT20	Keratin_ type I cytoskeletal 20 OS=Homo sapiens GN=KRT20 PE=1 SV=1	216.108	7.75561
P12273	2	2	PIP	Prolactin-inducible protein OS=Homo sapiens GN=PIP PE=1 SV=1	215.003	7.74821
Q8IX21	24	4	SLF2	SMC5-SMC6 complex localization factor protein 2 OS=Homo sapiens GN=SLF2 PE=1 SV=2	214.918	7.74764
P63208	18	3	SKP1	S-phase kinase-associated protein 1 OS=Homo sapiens GN=SKP1 PE=1 SV=2	214.246	7.74312
Q13435	115	12	SF3B2	Splicing factor 3B subunit 2 OS=Homo sapiens GN=SF3B2 PE=1 SV=2	213.956	7.74117
Q8N7J2	11	2	AMER2	APC membrane recruitment protein 2 OS=Homo sapiens GN=AMER2 PE=1 SV=3	213.735	7.73968
Q96R06	57	10	SPAG5	Sperm-associated antigen 5 OS=Homo sapiens GN=SPAG5 PE=1 SV=2	213.721	7.73959
P29692	73	12	EEF1D	Elongation factor 1-delta OS=Homo sapiens GN=EEF1D PE=1 SV=5	213.384	7.73731
P68402	9	7	PAFAH1B2	Platelet-activating factor acetylhydrolase IB subunit beta OS=Homo sapiens GN=PAFAH1B2 PE=1 SV=1	213.191	7.736
Q05086	61	4	UBE3A	Ubiquitin-protein ligase E3A OS=Homo sapiens GN=UBE3A PE=1 SV=4	213.167	7.73584
P62857	11	5	RPS28	40S ribosomal protein S28 OS=Homo sapiens GN=RPS28 PE=1 SV=1	213.08	7.73525
Q14444	65	7	CAPRIN1	Caprin-1 OS=Homo sapiens GN=CAPRIN1 PE=1 SV=2	212.814	7.73345
P47914	12	5	RPL29	60S ribosomal protein L29 OS=Homo sapiens GN=RPL29 PE=1 SV=2	212.546	7.73163
Q08379	49	8	GOLGA2	Golgin subfamily A member 2 OS=Homo sapiens GN=GOLGA2 PE=1 SV=3	212.489	7.73125
Q8IYK8	3	2	REM2	GTP-binding protein REM 2 OS=Homo sapiens GN=REM2 PE=1 SV=2	212.476	7.73116
P15104	20	10	GLUL	Glutamine synthetase OS=Homo sapiens GN=GLUL PE=1 SV=4	212.032	7.72814
Q8N573	31	3	OXR1	Oxidation resistance protein 1 OS=Homo sapiens GN=OXR1 PE=1 SV=2	211.95	7.72758
P54868	17	4	HMGCS2	Hydroxymethylglutaryl-CoA synthase_ mitochondrial OS=Homo sapiens GN=HMGCS2 PE=1 SV=1	211.918	7.72736
Q9UKM9	36	3	RALY	RNA-binding protein Raly OS=Homo sapiens GN=RALY PE=1 SV=1	211.754	7.72625
Q8N895	17	2	ZNF366	Zinc finger protein 366 OS=Homo sapiens GN=ZNF366 PE=1 SV=1	211.739	7.72615
Q02809	40	9	PLOD1	Procollagen-lysine_2-oxoglutarate 5-dioxygenase 1 OS=Homo sapiens GN=PLOD1 PE=1 SV=2	211.547	7.72483
P23634	88	19	ATP2B4	Plasma membrane calcium-transporting ATPase 4 OS=Homo sapiens GN=ATP2B4 PE=1 SV=2	211.458	7.72423
Q9Y2Q0	49	9	ATP8A1	Phospholipid-transporting ATPase IA OS=Homo sapiens GN=ATP8A1 PE=1 SV=1	210.765	7.71949
Q9C0D2	142	26	CEP295	Centrosomal protein of 295 kDa OS=Homo sapiens GN=CEP295 PE=1 SV=4	210.539	7.71794
P26232	86	13	CTNNA2	Catenin alpha-2 OS=Homo sapiens GN=CTNNA2 PE=1 SV=5	210.486	7.71758
Q9ULU8	97	2	CADPS	Calcium-dependent secretion activator 1 OS=Homo sapiens GN=CADPS PE=1 SV=3	210.454	7.71736
P18124	42	11	RPL7	60S ribosomal protein L7 OS=Homo sapiens GN=RPL7 PE=1 SV=1	210.312	7.71639
Q8IYD8	70	3	FANCM	Fanconi anemia group M protein OS=Homo sapiens GN=FANCM PE=1 SV=2	210.115	7.71503
Q9Y2A7	41	8	NCKAP1	Nck-associated protein 1 OS=Homo sapiens GN=NCKAP1 PE=1 SV=1	209.519	7.71094
Q16775	14	2	HAGH	Hydroxyacylglutathione hydrolase_ mitochondrial OS=Homo sapiens GN=HAGH PE=1 SV=2	209.477	7.71065
P32929	12	5	CTH	Cystathionine gamma-lyase OS=Homo sapiens GN=CTH PE=1 SV=3	209.234	7.70897
Q8N7H5	20	7	PAF1	RNA polymerase II-associated factor 1 homolog OS=Homo sapiens GN=PAF1 PE=1 SV=2	208.913	7.70676
Q9UIA9	45	2	XPO7	Exportin-7 OS=Homo sapiens GN=XPO7 PE=1 SV=3	208.677	7.70512
O95251	15	2	KAT7	Histone acetyltransferase KAT7 OS=Homo sapiens GN=KAT7 PE=1 SV=1	208.562	7.70433
Q15276	95	15	RABEP1	Rab GTPase-binding effector protein 1 OS=Homo sapiens GN=RABEP1 PE=1 SV=2	207.242	7.69518
A0A0A0MRM8	124	5	MYO6	Unconventional myosin-VI OS=Homo sapiens GN=MYO6 PE=1 SV=1	206.414	7.68939
Q96B97	14	2	SH3KBP1	SH3 domain-containing kinase-binding protein 1 OS=Homo sapiens GN=SH3KBP1 PE=1 SV=2	206.078	7.68705
Q9H6D7	9	2	HAUS4	HAUS augmin-like complex subunit 4 OS=Homo sapiens GN=HAUS4 PE=1 SV=1	205.985	7.68639
Q3KQU3	17	4	MAP7D1	MAP7 domain-containing protein 1 OS=Homo sapiens GN=MAP7D1 PE=1 SV=1	204.98	7.67934
Q99426	28	3	TBCB	Tubulin-folding cofactor B OS=Homo sapiens GN=TBCB PE=1 SV=2	204.837	7.67833
Q9Y5K6	33	8	CD2AP	CD2-associated protein OS=Homo sapiens GN=CD2AP PE=1 SV=1	204.815	7.67817
A5PKW4	7	2	PSD	PH and SEC7 domain-containing protein 1 OS=Homo sapiens GN=PSD PE=1 SV=2	204.78	7.67793
P54753	18	3	EPHB3	Ephrin type-B receptor 3 OS=Homo sapiens GN=EPHB3 PE=1 SV=2	204.408	7.67531
O14841	11	2	OPLAH	5-oxoprolinase OS=Homo sapiens GN=OPLAH PE=1 SV=3	204.335	7.67479
Q8TDZ2	26	5	MICAL1	[F-actin]-monooxygenase MICAL1 OS=Homo sapiens GN=MICAL1 PE=1 SV=2	204.237	7.6741
Q07890	33	3	SOS2	Son of sevenless homolog 2 OS=Homo sapiens GN=SOS2 PE=1 SV=2	204.156	7.67353
P50748	46	4	KNTC1	Kinetochore-associated protein 1 OS=Homo sapiens GN=KNTC1 PE=1 SV=1	203.778	7.67085
O75828	21	3	CBR3	Carbonyl reductase [NADPH] 3 OS=Homo sapiens GN=CBR3 PE=1 SV=3	203.711	7.67038
P07737	36	14	PFN1	Profilin-1 OS=Homo sapiens GN=PFN1 PE=1 SV=2	203.541	7.66917
P22061	23	2	PCMT1	Protein-L-isoaspartate(D-aspartate) O-methyltransferase OS=Homo sapiens GN=PCMT1 PE=1 SV=4	203.53	7.6691
Q00325	36	3	SLC25A3	Phosphate carrier protein_ mitochondrial OS=Homo sapiens GN=SLC25A3 PE=1 SV=2	202.237	7.6599
Q9ULU4	51	3	ZMYND8	Protein kinase C-binding protein 1 OS=Homo sapiens GN=ZMYND8 PE=1 SV=2	202.192	7.65958
Q8IZD9	50	6	DOCK3	Dedicator of cytokinesis protein 3 OS=Homo sapiens GN=DOCK3 PE=1 SV=1	202.116	7.65904
P10515	34	3	DLAT	Dihydrolipoyllysine-residue acetyltransferase component of pyruvate dehydrogenase complex_ mitochondrial OS=Homo sapiens GN=DLAT PE=1 SV=3	202.031	7.65843
Q15155	47	3	NOMO1	Nodal modulator 1 OS=Homo sapiens GN=NOMO1 PE=1 SV=5	201.636	7.65561
P29762	30	6	CRABP1	Cellular retinoic acid-binding protein 1 OS=Homo sapiens GN=CRABP1 PE=1 SV=2	201.471	7.65443
Q03113	30	7	GNA12	Guanine nucleotide-binding protein subunit alpha-12 OS=Homo sapiens GN=GNA12 PE=1 SV=4	201.17	7.65227
Q58F21	17	2	BRDT	Bromodomain testis-specific protein OS=Homo sapiens GN=BRDT PE=1 SV=4	200.844	7.64993
Q9H4M7	6	2	PLEKHA4	Pleckstrin homology domain-containing family A member 4 OS=Homo sapiens GN=PLEKHA4 PE=1 SV=2	200.81	7.64969
Q7Z3U7	22	4	MON2	Protein MON2 homolog OS=Homo sapiens GN=MON2 PE=1 SV=3	200.766	7.64937
P40222	22	4	TXLNA	Alpha-taxilin OS=Homo sapiens GN=TXLNA PE=1 SV=3	199.074	7.63716
Q6JQN1	35	4	ACAD10	Acyl-CoA dehydrogenase family member 10 OS=Homo sapiens GN=ACAD10 PE=1 SV=1	198.862	7.63562
Q92523	6	4	CPT1B	Carnitine O-palmitoyltransferase 1_ muscle isoform OS=Homo sapiens GN=CPT1B PE=1 SV=2	198.802	7.63519
O95674	7	3	CDS2	Phosphatidate cytidylyltransferase 2 OS=Homo sapiens GN=CDS2 PE=1 SV=1	198.144	7.63041
Q9Y3Z3	23	6	SAMHD1	Deoxynucleoside triphosphate triphosphohydrolase SAMHD1 OS=Homo sapiens GN=SAMHD1 PE=1 SV=2	197.993	7.6293
Q15751	150	30	HERC1	Probable E3 ubiquitin-protein ligase HERC1 OS=Homo sapiens GN=HERC1 PE=1 SV=2	196.966	7.62181
P50851	130	7	LRBA	Lipopolysaccharide-responsive and beige-like anchor protein OS=Homo sapiens GN=LRBA PE=1 SV=4	196.759	7.62028
Q9NPD3	5	2	EXOSC4	Exosome complex component RRP41 OS=Homo sapiens GN=EXOSC4 PE=1 SV=3	195.932	7.61421
Q01968	18	3	OCRL	Inositol polyphosphate 5-phosphatase OCRL-1 OS=Homo sapiens GN=OCRL PE=1 SV=3	195.808	7.61329
O00754	24	6	MAN2B1	Lysosomal alpha-mannosidase OS=Homo sapiens GN=MAN2B1 PE=1 SV=3	195.003	7.60735
Q96PU5	62	8	NEDD4L	E3 ubiquitin-protein ligase NEDD4-like OS=Homo sapiens GN=NEDD4L PE=1 SV=2	194.348	7.6025
Q96DI7	24	7	SNRNP40	U5 small nuclear ribonucleoprotein 40 kDa protein OS=Homo sapiens GN=SNRNP40 PE=1 SV=1	193.659	7.59738
Q6P1X5	21	3	TAF2	Transcription initiation factor TFIID subunit 2 OS=Homo sapiens GN=TAF2 PE=1 SV=3	193.423	7.59561
P30622	149	5	CLIP1	CAP-Gly domain-containing linker protein 1 OS=Homo sapiens GN=CLIP1 PE=1 SV=2	193.362	7.59516
Q8WVM8	38	10	SCFD1	Sec1 family domain-containing protein 1 OS=Homo sapiens GN=SCFD1 PE=1 SV=4	193.36	7.59515
P43487	35	7	RANBP1	Ran-specific GTPase-activating protein OS=Homo sapiens GN=RANBP1 PE=1 SV=1	193.208	7.59401
Q8TDJ6	29	5	DMXL2	DmX-like protein 2 OS=Homo sapiens GN=DMXL2 PE=1 SV=2	192.654	7.58987
O94986	76	10	CEP152	Centrosomal protein of 152 kDa OS=Homo sapiens GN=CEP152 PE=1 SV=4	192.416	7.58808
Q15814	16	2	TBCC	Tubulin-specific chaperone C OS=Homo sapiens GN=TBCC PE=1 SV=2	191.489	7.58112
A0A1B0GUH0	41	3	RP1	Oxygen-regulated protein 1 OS=Homo sapiens GN=RP1 PE=4 SV=1	191.427	7.58065
Q9UBS9	10	2	SUCO	SUN domain-containing ossification factor OS=Homo sapiens GN=SUCO PE=1 SV=1	191.394	7.5804
Q13332	89	10	PTPRS	Receptor-type tyrosine-protein phosphatase S OS=Homo sapiens GN=PTPRS PE=1 SV=3	190.925	7.57686
P52789	59	4	HK2	Hexokinase-2 OS=Homo sapiens GN=HK2 PE=1 SV=2	190.646	7.57475
O95336	16	4	PGLS	6-phosphogluconolactonase OS=Homo sapiens GN=PGLS PE=1 SV=2	190.266	7.57187
Q92835	33	2	INPP5D	Phosphatidylinositol 3_4_5-trisphosphate 5-phosphatase 1 OS=Homo sapiens GN=INPP5D PE=1 SV=2	190.19	7.57129
P63162	22	4	SNRPN	Small nuclear ribonucleoprotein-associated protein N OS=Homo sapiens GN=SNRPN PE=1 SV=1	189.949	7.56947
P50440	25	6	GATM	Glycine amidinotransferase_ mitochondrial OS=Homo sapiens GN=GATM PE=1 SV=1	189.194	7.56372
O15360	22	2	FANCA	Fanconi anemia group A protein OS=Homo sapiens GN=FANCA PE=1 SV=2	189.16	7.56347
H3BTV3	3	3	FEM1B	Protein fem-1 homolog B (Fragment) OS=Homo sapiens GN=FEM1B PE=1 SV=1	189.042	7.56256
Q8N944	3	2	AMER3	APC membrane recruitment protein 3 OS=Homo sapiens GN=AMER3 PE=1 SV=2	188.664	7.55967
P09543	95	39	CNP	2'_3'-cyclic-nucleotide 3'-phosphodiesterase OS=Homo sapiens GN=CNP PE=1 SV=2	188.361	7.55736
Q5T655	91	17	CFAP58	Cilia- and flagella-associated protein 58 OS=Homo sapiens GN=CFAP58 PE=1 SV=1	188.244	7.55646
Q76NI1	22	5	KNDC1	Protein very KIND OS=Homo sapiens GN=KNDC1 PE=2 SV=2	187.952	7.55422
P62333	52	6	PSMC6	26S proteasome regulatory subunit 10B OS=Homo sapiens GN=PSMC6 PE=1 SV=1	187.594	7.55147
Q460N5	57	7	PARP14	Poly [ADP-ribose] polymerase 14 OS=Homo sapiens GN=PARP14 PE=1 SV=3	187.594	7.55147
Q00169	31	5	PITPNA	Phosphatidylinositol transfer protein alpha isoform OS=Homo sapiens GN=PITPNA PE=1 SV=2	187.316	7.54933
Q96PP9	19	4	GBP4	Guanylate-binding protein 4 OS=Homo sapiens GN=GBP4 PE=2 SV=2	187.177	7.54826
P06753	65	2	TPM3	Tropomyosin alpha-3 chain OS=Homo sapiens GN=TPM3 PE=1 SV=2	187.117	7.5478
H7C0I3	6	2	DOCK10	Dedicator of cytokinesis protein 10 (Fragment) OS=Homo sapiens GN=DOCK10 PE=1 SV=1	186.324	7.54167
Q9Y608	63	8	LRRFIP2	Leucine-rich repeat flightless-interacting protein 2 OS=Homo sapiens GN=LRRFIP2 PE=1 SV=1	185.683	7.5367
Q8TD84	30	2	DSCAML1	Down syndrome cell adhesion molecule-like protein 1 OS=Homo sapiens GN=DSCAML1 PE=1 SV=2	185.523	7.53546
Q8N5Y2	9	2	MSL3	Male-specific lethal 3 homolog OS=Homo sapiens GN=MSL3 PE=1 SV=1	185.4	7.53449
P35998	74	5	PSMC2	26S proteasome regulatory subunit 7 OS=Homo sapiens GN=PSMC2 PE=1 SV=3	185.194	7.53289
Q9Y520	162	2	PRRC2C	Protein PRRC2C OS=Homo sapiens GN=PRRC2C PE=1 SV=4	185.012	7.53148
Q7Z6E9	116	22	RBBP6	E3 ubiquitin-protein ligase RBBP6 OS=Homo sapiens GN=RBBP6 PE=1 SV=1	184.01	7.52364
E5RG59	9	4	ZNF395	Zinc finger protein 395 (Fragment) OS=Homo sapiens GN=ZNF395 PE=1 SV=1	183.52	7.51979
Q9NRC6	102	24	SPTBN5	Spectrin beta chain_ non-erythrocytic 5 OS=Homo sapiens GN=SPTBN5 PE=1 SV=2	183.251	7.51768
Q9Y4G6	138	20	TLN2	Talin-2 OS=Homo sapiens GN=TLN2 PE=1 SV=4	183.239	7.51758
Q9UN70	29	7	PCDHGC3	Protocadherin gamma-C3 OS=Homo sapiens GN=PCDHGC3 PE=1 SV=1	183.031	7.51595
Q9Y2J2	120	12	EPB41L3	Band 4.1-like protein 3 OS=Homo sapiens GN=EPB41L3 PE=1 SV=2	182.34	7.51049
O95218	8	3	ZRANB2	Zinc finger Ran-binding domain-containing protein 2 OS=Homo sapiens GN=ZRANB2 PE=1 SV=2	182.335	7.51045
Q66LE6	23	3	PPP2R2D	Serine/threonine-protein phosphatase 2A 55 kDa regulatory subunit B delta isoform OS=Homo sapiens GN=PPP2R2D PE=1 SV=1	181.672	7.50519
Q9Y5G2	7	2	PCDHGB2	Protocadherin gamma-B2 OS=Homo sapiens GN=PCDHGB2 PE=2 SV=1	181.348	7.50262
P00450	12	3	CP	Ceruloplasmin OS=Homo sapiens GN=CP PE=1 SV=1	181.204	7.50147
Q8IVL1	113	4	NAV2	Neuron navigator 2 OS=Homo sapiens GN=NAV2 PE=1 SV=3	181.185	7.50132
Q6SZW1	24	6	SARM1	Sterile alpha and TIR motif-containing protein 1 OS=Homo sapiens GN=SARM1 PE=1 SV=1	180.925	7.49925
Q96MU7	16	2	YTHDC1	YTH domain-containing protein 1 OS=Homo sapiens GN=YTHDC1 PE=1 SV=3	180.902	7.49906
Q9H501	27	5	ESF1	ESF1 homolog OS=Homo sapiens GN=ESF1 PE=1 SV=1	180.423	7.49524
Q5T9A4	42	2	ATAD3B	ATPase family AAA domain-containing protein 3B OS=Homo sapiens GN=ATAD3B PE=1 SV=1	180.162	7.49315
P21439	27	8	ABCB4	Phosphatidylcholine translocator ABCB4 OS=Homo sapiens GN=ABCB4 PE=1 SV=2	180.017	7.49199
Q8NEZ3	51	4	WDR19	WD repeat-containing protein 19 OS=Homo sapiens GN=WDR19 PE=1 SV=2	179.949	7.49145
Q70EL1	53	6	USP54	Inactive ubiquitin carboxyl-terminal hydrolase 54 OS=Homo sapiens GN=USP54 PE=1 SV=4	179.601	7.48865
P78524	50	4	ST5	Suppression of tumorigenicity 5 protein OS=Homo sapiens GN=ST5 PE=1 SV=3	178.698	7.48138
P37268	60	6	FDFT1	Squalene synthase OS=Homo sapiens GN=FDFT1 PE=1 SV=1	178.29	7.47808
Q6NV74	12	4	KIAA1211L	Uncharacterized protein KIAA1211-like OS=Homo sapiens GN=KIAA1211L PE=1 SV=3	177.944	7.47528
Q8NHP1	12	5	AKR7L	Aflatoxin B1 aldehyde reductase member 4 OS=Homo sapiens GN=AKR7L PE=1 SV=6	177.899	7.47492
Q5TB80	49	7	CEP162	Centrosomal protein of 162 kDa OS=Homo sapiens GN=CEP162 PE=1 SV=2	177.777	7.47392
A4FU69	70	9	EFCAB5	EF-hand calcium-binding domain-containing protein 5 OS=Homo sapiens GN=EFCAB5 PE=1 SV=3	177.761	7.47379
O94804	19	2	STK10	Serine/threonine-protein kinase 10 OS=Homo sapiens GN=STK10 PE=1 SV=1	177.576	7.47229
Q96E17	14	5	RAB3C	Ras-related protein Rab-3C OS=Homo sapiens GN=RAB3C PE=2 SV=1	177.523	7.47187
Q14696	9	2	MESD	LRP chaperone MESD OS=Homo sapiens GN=MESD PE=1 SV=2	177.448	7.47125
Q15349	50	4	RPS6KA2	Ribosomal protein S6 kinase alpha-2 OS=Homo sapiens GN=RPS6KA2 PE=1 SV=2	177.441	7.4712
P38398	98	6	BRCA1	Breast cancer type 1 susceptibility protein OS=Homo sapiens GN=BRCA1 PE=1 SV=2	177.44	7.47119
Q8IUG5	172	3	MYO18B	Unconventional myosin-XVIIIb OS=Homo sapiens GN=MYO18B PE=1 SV=1	177.396	7.47083
O95197	72	11	RTN3	Reticulon-3 OS=Homo sapiens GN=RTN3 PE=1 SV=2	177.255	7.46968
P42858	60	12	HTT	Huntingtin OS=Homo sapiens GN=HTT PE=1 SV=2	176.967	7.46734
Q15811	122	14	ITSN1	Intersectin-1 OS=Homo sapiens GN=ITSN1 PE=1 SV=3	176.925	7.46699
A0A1B0GTW6	39	2	EPB41L1	Band 4.1-like protein 1 (Fragment) OS=Homo sapiens GN=EPB41L1 PE=1 SV=1	176.883	7.46665
Q9UNM6	43	3	PSMD13	26S proteasome non-ATPase regulatory subunit 13 OS=Homo sapiens GN=PSMD13 PE=1 SV=2	176.502	7.46354
Q92766	20	5	RREB1	Ras-responsive element-binding protein 1 OS=Homo sapiens GN=RREB1 PE=1 SV=3	176.381	7.46255
P42685	13	3	FRK	Tyrosine-protein kinase FRK OS=Homo sapiens GN=FRK PE=1 SV=1	176.322	7.46207
O43301	47	2	HSPA12A	Heat shock 70 kDa protein 12A OS=Homo sapiens GN=HSPA12A PE=1 SV=2	176.273	7.46167
O14672	14	5	ADAM10	Disintegrin and metalloproteinase domain-containing protein 10 OS=Homo sapiens GN=ADAM10 PE=1 SV=1	176.084	7.46012
B1AHL2	11	2	FBLN1	Fibulin-1 OS=Homo sapiens GN=FBLN1 PE=1 SV=1	175.844	7.45815
P53041	51	3	PPP5C	Serine/threonine-protein phosphatase 5 OS=Homo sapiens GN=PPP5C PE=1 SV=1	175.606	7.4562
Q9Y5S2	72	15	CDC42BPB	Serine/threonine-protein kinase MRCK beta OS=Homo sapiens GN=CDC42BPB PE=1 SV=2	175.374	7.45429
P27694	58	9	RPA1	Replication protein A 70 kDa DNA-binding subunit OS=Homo sapiens GN=RPA1 PE=1 SV=2	175.026	7.45143
Q8WX93	47	7	PALLD	Palladin OS=Homo sapiens GN=PALLD PE=1 SV=3	174.904	7.45042
P11310	34	5	ACADM	Medium-chain specific acyl-CoA dehydrogenase_ mitochondrial OS=Homo sapiens GN=ACADM PE=1 SV=1	174.572	7.44768
Q9UBK9	8	2	UXT	Protein UXT OS=Homo sapiens GN=UXT PE=1 SV=1	174.265	7.44514
Q8IZJ3	13	3	CPAMD8	C3 and PZP-like alpha-2-macroglobulin domain-containing protein 8 OS=Homo sapiens GN=CPAMD8 PE=1 SV=2	174.002	7.44296
Q92752	64	34	TNR	Tenascin-R OS=Homo sapiens GN=TNR PE=1 SV=3	173.893	7.44206
O15164	31	14	TRIM24	Transcription intermediary factor 1-alpha OS=Homo sapiens GN=TRIM24 PE=1 SV=3	173.739	7.44078
Q6V0I7	97	13	FAT4	Protocadherin Fat 4 OS=Homo sapiens GN=FAT4 PE=1 SV=2	173.469	7.43854
P78362	24	5	SRPK2	SRSF protein kinase 2 OS=Homo sapiens GN=SRPK2 PE=1 SV=3	173.353	7.43757
Q9H6Z4	24	2	RANBP3	Ran-binding protein 3 OS=Homo sapiens GN=RANBP3 PE=1 SV=1	172.957	7.43427
P35030	9	2	PRSS3	Trypsin-3 OS=Homo sapiens GN=PRSS3 PE=1 SV=2	172.931	7.43405
O00567	32	7	NOP56	Nucleolar protein 56 OS=Homo sapiens GN=NOP56 PE=1 SV=4	172.884	7.43366
Q6ZNJ1	51	6	NBEAL2	Neurobeachin-like protein 2 OS=Homo sapiens GN=NBEAL2 PE=1 SV=2	172.655	7.43175
Q6N022	42	7	TENM4	Teneurin-4 OS=Homo sapiens GN=TENM4 PE=1 SV=2	172.47	7.43021
Q9NPQ8	27	3	RIC8A	Synembryn-A OS=Homo sapiens GN=RIC8A PE=1 SV=3	172.342	7.42913
Q9H3S7	64	10	PTPN23	Tyrosine-protein phosphatase non-receptor type 23 OS=Homo sapiens GN=PTPN23 PE=1 SV=1	172.254	7.42839
P62263	10	3	RPS14	40S ribosomal protein S14 OS=Homo sapiens GN=RPS14 PE=1 SV=3	172.041	7.42661
Q96ST8	30	5	CEP89	Centrosomal protein of 89 kDa OS=Homo sapiens GN=CEP89 PE=1 SV=3	171.437	7.42153
Q9UNX4	15	4	WDR3	WD repeat-containing protein 3 OS=Homo sapiens GN=WDR3 PE=1 SV=1	171.225	7.41975
P17252	38	3	PRKCA	Protein kinase C alpha type OS=Homo sapiens GN=PRKCA PE=1 SV=4	171.156	7.41916
P31146	25	6	CORO1A	Coronin-1A OS=Homo sapiens GN=CORO1A PE=1 SV=4	171.074	7.41848
O94826	47	12	TOMM70	Mitochondrial import receptor subunit TOM70 OS=Homo sapiens GN=TOMM70 PE=1 SV=1	170.841	7.41651
P02538	61	3	KRT6A	Keratin_ type II cytoskeletal 6A OS=Homo sapiens GN=KRT6A PE=1 SV=3	170.644	7.41485
P01024	57	12	C3	Complement C3 OS=Homo sapiens GN=C3 PE=1 SV=2	170.583	7.41433
Q8N883	9	2	ZNF614	Zinc finger protein 614 OS=Homo sapiens GN=ZNF614 PE=1 SV=2	170.266	7.41165
Q9BX97	7	3	PLVAP	Plasmalemma vesicle-associated protein OS=Homo sapiens GN=PLVAP PE=2 SV=1	170.224	7.41129
O14686	59	10	KMT2D	Histone-lysine N-methyltransferase 2D OS=Homo sapiens GN=KMT2D PE=1 SV=2	169.706	7.40689
Q9Y5K8	19	2	ATP6V1D	V-type proton ATPase subunit D OS=Homo sapiens GN=ATP6V1D PE=1 SV=1	169.482	7.40499
Q13620	55	4	CUL4B	Cullin-4B OS=Homo sapiens GN=CUL4B PE=1 SV=4	168.724	7.39852
Q86SQ0	46	2	PHLDB2	Pleckstrin homology-like domain family B member 2 OS=Homo sapiens GN=PHLDB2 PE=1 SV=2	168.54	7.39695
Q9Y5A9	24	8	YTHDF2	YTH domain-containing family protein 2 OS=Homo sapiens GN=YTHDF2 PE=1 SV=2	168.4	7.39575
Q9UQR0	14	2	SCML2	Sex comb on midleg-like protein 2 OS=Homo sapiens GN=SCML2 PE=1 SV=1	168.374	7.39552
Q9UIG0	18	3	BAZ1B	Tyrosine-protein kinase BAZ1B OS=Homo sapiens GN=BAZ1B PE=1 SV=2	168.004	7.39235
Q86WI1	34	5	PKHD1L1	Fibrocystin-L OS=Homo sapiens GN=PKHD1L1 PE=2 SV=2	167.979	7.39213
Q96GR2	13	4	ACSBG1	Long-chain-fatty-acid--CoA ligase ACSBG1 OS=Homo sapiens GN=ACSBG1 PE=2 SV=2	167.838	7.39093
Q9UNZ2	45	9	NSFL1C	NSFL1 cofactor p47 OS=Homo sapiens GN=NSFL1C PE=1 SV=2	167.737	7.39006
Q14165	17	2	MLEC	Malectin OS=Homo sapiens GN=MLEC PE=1 SV=1	167.466	7.38773
P62906	18	5	RPL10A	60S ribosomal protein L10a OS=Homo sapiens GN=RPL10A PE=1 SV=2	167.35	7.38673
Q12888	152	7	TP53BP1	TP53-binding protein 1 OS=Homo sapiens GN=TP53BP1 PE=1 SV=2	167.152	7.38501
Q8WVY7	20	5	UBLCP1	Ubiquitin-like domain-containing CTD phosphatase 1 OS=Homo sapiens GN=UBLCP1 PE=1 SV=2	166.391	7.37843
Q9GZL7	28	8	WDR12	Ribosome biogenesis protein WDR12 OS=Homo sapiens GN=WDR12 PE=1 SV=2	166.379	7.37833
Q9BVI0	11	2	PHF20	PHD finger protein 20 OS=Homo sapiens GN=PHF20 PE=1 SV=2	166.37	7.37825
P56192	59	9	MARS	Methionine--tRNA ligase_ cytoplasmic OS=Homo sapiens GN=MARS PE=1 SV=2	166.36	7.37817
Q2Q1W2	33	17	TRIM71	E3 ubiquitin-protein ligase TRIM71 OS=Homo sapiens GN=TRIM71 PE=1 SV=1	165.836	7.37361
P82970	26	2	HMGN5	High mobility group nucleosome-binding domain-containing protein 5 OS=Homo sapiens GN=HMGN5 PE=1 SV=1	165.09	7.36711
Q6P4F7	10	2	ARHGAP11A	Rho GTPase-activating protein 11A OS=Homo sapiens GN=ARHGAP11A PE=1 SV=2	164.696	7.36366
P35813	41	6	PPM1A	Protein phosphatase 1A OS=Homo sapiens GN=PPM1A PE=1 SV=1	164.686	7.36358
Q9H936	15	2	SLC25A22	Mitochondrial glutamate carrier 1 OS=Homo sapiens GN=SLC25A22 PE=1 SV=1	164.139	7.35877
Q9BWT3	19	3	PAPOLG	Poly(A) polymerase gamma OS=Homo sapiens GN=PAPOLG PE=1 SV=2	164.137	7.35875
P05386	5	4	RPLP1	60S acidic ribosomal protein P1 OS=Homo sapiens GN=RPLP1 PE=1 SV=1	163.977	7.35735
P62241	37	5	RPS8	40S ribosomal protein S8 OS=Homo sapiens GN=RPS8 PE=1 SV=2	163.903	7.3567
O00507	49	3	USP9Y	Probable ubiquitin carboxyl-terminal hydrolase FAF-Y OS=Homo sapiens GN=USP9Y PE=2 SV=2	163.877	7.35647
P61077	4	2	UBE2D3	Ubiquitin-conjugating enzyme E2 D3 OS=Homo sapiens GN=UBE2D3 PE=1 SV=1	163.639	7.35438
A8MWY0	16	2	KIAA1324L	UPF0577 protein KIAA1324-like OS=Homo sapiens GN=KIAA1324L PE=1 SV=2	163.547	7.35356
O00487	25	9	PSMD14	26S proteasome non-ATPase regulatory subunit 14 OS=Homo sapiens GN=PSMD14 PE=1 SV=1	163.353	7.35185
P61266	40	14	STX1B	Syntaxin-1B OS=Homo sapiens GN=STX1B PE=1 SV=1	162.951	7.34829
Q6WKZ4	27	3	RAB11FIP1	Rab11 family-interacting protein 1 OS=Homo sapiens GN=RAB11FIP1 PE=1 SV=3	162.202	7.34165
P20339	27	10	RAB5A	Ras-related protein Rab-5A OS=Homo sapiens GN=RAB5A PE=1 SV=2	162.075	7.34052
Q9H8N7	7	2	ZNF395	Zinc finger protein 395 OS=Homo sapiens GN=ZNF395 PE=1 SV=2	161.204	7.33275
O00512	13	4	BCL9	B-cell CLL/lymphoma 9 protein OS=Homo sapiens GN=BCL9 PE=1 SV=4	161.106	7.33187
P30520	23	12	ADSS	Adenylosuccinate synthetase isozyme 2 OS=Homo sapiens GN=ADSS PE=1 SV=3	160.986	7.33079
Q86U44	11	2	METTL3	N6-adenosine-methyltransferase 70 kDa subunit OS=Homo sapiens GN=METTL3 PE=1 SV=2	160.68	7.32804
P42336	28	5	PIK3CA	Phosphatidylinositol 4_5-bisphosphate 3-kinase catalytic subunit alpha isoform OS=Homo sapiens GN=PIK3CA PE=1 SV=2	159.923	7.32123
Q86U86	53	3	PBRM1	Protein polybromo-1 OS=Homo sapiens GN=PBRM1 PE=1 SV=1	159.891	7.32094
O75528	4	2	TADA3	Transcriptional adapter 3 OS=Homo sapiens GN=TADA3 PE=1 SV=1	159.838	7.32047
Q4AC99	8	2	ACCSL	Probable inactive 1-aminocyclopropane-1-carboxylate synthase-like protein 2 OS=Homo sapiens GN=ACCSL PE=2 SV=3	159.751	7.31968
P56945	8	2	BCAR1	Breast cancer anti-estrogen resistance protein 1 OS=Homo sapiens GN=BCAR1 PE=1 SV=2	159.382	7.31634
Q6PCE3	30	8	PGM2L1	Glucose 1_6-bisphosphate synthase OS=Homo sapiens GN=PGM2L1 PE=1 SV=3	159.297	7.31557
P68366	58	9	TUBA4A	Tubulin alpha-4A chain OS=Homo sapiens GN=TUBA4A PE=1 SV=1	159.045	7.31329
Q71UI9	17	2	H2AFV	Histone H2A.V OS=Homo sapiens GN=H2AFV PE=1 SV=3	158.79	7.31097
Q9Y618	195	10	NCOR2	Nuclear receptor corepressor 2 OS=Homo sapiens GN=NCOR2 PE=1 SV=2	158.686	7.31003
Q12901	13	3	ZNF155	Zinc finger protein 155 OS=Homo sapiens GN=ZNF155 PE=1 SV=4	157.991	7.30369
Q5VV41	26	4	ARHGEF16	Rho guanine nucleotide exchange factor 16 OS=Homo sapiens GN=ARHGEF16 PE=1 SV=1	157.871	7.30261
Q14257	42	4	RCN2	Reticulocalbin-2 OS=Homo sapiens GN=RCN2 PE=1 SV=1	157.234	7.29677
Q96SU4	22	3	OSBPL9	Oxysterol-binding protein-related protein 9 OS=Homo sapiens GN=OSBPL9 PE=1 SV=2	157.183	7.2963
Q53SF7	48	5	COBLL1	Cordon-bleu protein-like 1 OS=Homo sapiens GN=COBLL1 PE=1 SV=2	157.064	7.29521
P35613	36	5	BSG	Basigin OS=Homo sapiens GN=BSG PE=1 SV=2	157.05	7.29508
Q9P266	13	4	JCAD	Junctional protein associated with coronary artery disease OS=Homo sapiens GN=JCAD PE=1 SV=3	156.866	7.29339
P59998	13	3	ARPC4	Actin-related protein 2/3 complex subunit 4 OS=Homo sapiens GN=ARPC4 PE=1 SV=3	156.801	7.29279
O60783	5	3	MRPS14	28S ribosomal protein S14_ mitochondrial OS=Homo sapiens GN=MRPS14 PE=1 SV=1	156.619	7.29111
Q9HBD1	24	5	RC3H2	Roquin-2 OS=Homo sapiens GN=RC3H2 PE=1 SV=2	156.406	7.28915
Q16630	42	6	CPSF6	Cleavage and polyadenylation specificity factor subunit 6 OS=Homo sapiens GN=CPSF6 PE=1 SV=2	156.292	7.2881
Q13621	22	3	SLC12A1	Solute carrier family 12 member 1 OS=Homo sapiens GN=SLC12A1 PE=1 SV=2	156.261	7.28781
Q13936	30	2	CACNA1C	Voltage-dependent L-type calcium channel subunit alpha-1C OS=Homo sapiens GN=CACNA1C PE=1 SV=4	156.173	7.287
Q7L0J3	21	4	SV2A	Synaptic vesicle glycoprotein 2A OS=Homo sapiens GN=SV2A PE=1 SV=1	156.057	7.28593
Q8TAQ2	118	3	SMARCC2	SWI/SNF complex subunit SMARCC2 OS=Homo sapiens GN=SMARCC2 PE=1 SV=1	155.947	7.28491
P53634	21	8	CTSC	Dipeptidyl peptidase 1 OS=Homo sapiens GN=CTSC PE=1 SV=2	155.431	7.28013
P46531	14	2	NOTCH1	Neurogenic locus notch homolog protein 1 OS=Homo sapiens GN=NOTCH1 PE=1 SV=4	155.185	7.27784
Q86T65	49	2	DAAM2	Disheveled-associated activator of morphogenesis 2 OS=Homo sapiens GN=DAAM2 PE=1 SV=3	155.151	7.27752
E7ETB9	56	5	DST	Dystonin (Fragment) OS=Homo sapiens GN=DST PE=1 SV=1	154.817	7.27442
Q5R372	19	3	RABGAP1L	Rab GTPase-activating protein 1-like OS=Homo sapiens GN=RABGAP1L PE=1 SV=1	154.284	7.26944
P07951	64	6	TPM2	Tropomyosin beta chain OS=Homo sapiens GN=TPM2 PE=1 SV=1	154.031	7.26708
P06493	24	3	CDK1	Cyclin-dependent kinase 1 OS=Homo sapiens GN=CDK1 PE=1 SV=3	153.973	7.26653
Q92621	52	11	NUP205	Nuclear pore complex protein Nup205 OS=Homo sapiens GN=NUP205 PE=1 SV=3	153.942	7.26624
Q8NI35	50	4	PATJ	InaD-like protein OS=Homo sapiens GN=PATJ PE=1 SV=3	153.81	7.26501
P43004	19	4	SLC1A2	Excitatory amino acid transporter 2 OS=Homo sapiens GN=SLC1A2 PE=1 SV=2	153.479	7.2619
Q8N4C8	28	2	MINK1	Misshapen-like kinase 1 OS=Homo sapiens GN=MINK1 PE=1 SV=2	153.444	7.26157
Q99439	23	2	CNN2	Calponin-2 OS=Homo sapiens GN=CNN2 PE=1 SV=4	153.429	7.26143
P05067	45	3	APP	Amyloid-beta A4 protein OS=Homo sapiens GN=APP PE=1 SV=3	153.415	7.2613
P43246	115	7	MSH2	DNA mismatch repair protein Msh2 OS=Homo sapiens GN=MSH2 PE=1 SV=1	153.104	7.25837
[truncated: 1,074 more rows]
